# Supplementary material for: γ-Valerolactone as an alternative biomass-derived medium for the Sonogashira reaction
Source: Royal Society of Chemistry journal article supplement (doi:10.1039/c4gc01728e), 2014-10-28

## ELECTRONIC SUPPORTING INFORMATION

# **$\gamma$ -Valerolactone as an alternative biomass-derived medium for the Sonogashira reaction**

Giacomo Strappaveccia,<sup>[a]</sup> Lorenzo Luciani,<sup>[a]</sup> Elena Bartollini,<sup>[a]</sup> Assunta Marrocchi,<sup>[a]</sup> Ferdinando Pizzo,<sup>[a]</sup> Luigi Vaccaro\*<sup>[a]</sup>

<sup>[a]</sup> Laboratory of Green Synthetic Organic Chemistry, CEMIN – Dipartimento di Chimica, Università di Perugia Via Elce di Sotto 8, 06123 Perugia, Italia, E-mail: [luigi.vaccaro@unipg.it](mailto:luigi.vaccaro@unipg.it)

### CONTENTS

page ESI 1 Experimental Section

page ESI 2-ESI 21 Full characterization data (<sup>1</sup>H NMR, <sup>13</sup>C NMR, <sup>19</sup>F NMR, EA, GC-EIMS) for Compounds **3 a-q**

page ESI 23-ESI 53 Copies of the <sup>1</sup>H, <sup>13</sup>C NMR and <sup>19</sup>F NMR for compounds **3 a-q**

## Experimental Section

Unless otherwise stated, all solvents and reagents were used as obtained from Sigma-Aldrich Co. without further purification. Commercial Pd/C (10% wt) was not activated prior to use, and the value of palladium loading was taken from its certificate of analysis available at <http://www.sigmaaldrich.com>. GLC analyses were performed by using Hewlett-Packard HP 5890A equipped with a capillary column DB-35MS (30 m, 0.53 mm), a FID detector and hydrogen as gas carrier. GC-EIMS analyses were carried out by using a Hewlett-Packard HP 6890N Network GC system/5975 Mass Selective Detector equipped with an electron impact ionizer at 70 eV. NMR spectra were recorded on a Bruker DRX-ADVANCE 400 MHz ( $^1\text{H}$  at 400 MHz,  $^{13}\text{C}$  at 100.6 MHz and  $^{19}\text{F}$  at 376.4 MHz) in  $\text{CDCl}_3$  using TMS as the internal standard. Elemental Analyses were conducted on a Fisons EA1108CHN. Melting points are not corrected and they were measured on a Büchi 510. An Inductive Coupled Plasma-Optical Emission Spectrometer (ICP-OES 710 Agilent Technology) was used to determine the amount of leached palladium into the reaction products.

Compounds **3a**,<sup>1</sup> **3b**,<sup>1</sup> **3c**,<sup>1</sup> **3d**,<sup>2</sup> **3e**,<sup>1</sup> **3f**,<sup>1</sup> **3g**,<sup>3</sup> **3h**,<sup>4</sup> **3i**,<sup>4</sup> **3j**,<sup>4</sup> **3k**,<sup>5</sup> **3l**,<sup>4</sup> **3m**,<sup>5</sup> **3n**,<sup>6</sup> **3o**,<sup>6</sup> **3p**,<sup>6</sup> **3q**<sup>7</sup> are known compounds.

Characterization data and copies of the  $^1\text{H}$  and  $^{13}\text{C}$  NMR are reported below.

### Reference:

- (1) A. Modak, J. Mondal, A. Bhaumik, *Green Chem.* **2012**, *14*, 2840–2855
- (2) K. Worm-Leonhard, M. Meldal, *Eur. J. Org. Chem.*, **2008**, *31*, 5244-5253
- (3) R. Thorwirth, A. Stolle, B. Ondruschka, *Green Chem.*, **2010**, *12*, 985-991
- (4) S. Mori, T. Yanase, S. Aoyagi, Y. Monguchi, T. Maegawa, H. Sajiki, *Chem. Eur. J.*, **2008**, *14*, 6994-6999
- (5) Y. Shi, X. Li, J. Liu, W. Jiang, L. Sun, *Appl. Organometal. Chem.*, **2011**, *25*, 514-520
- (6) S. Urgaonkar, J. G. Verkade, *J. Org. Chem.*, **2004**, *69*, 5752-5755
- (7) L. Yang, Y. Li, Q. Chen, Y. Du, C. Cao, Y. Shi, G. Pang, *Tetrahedron*, **2013**, *69*, 5178-5184
- (8) K. Takahashi, Y. Kuroyama, K. Sonogashira, N. Hagihara, *Synthesis*, **1980**, 627-630

|                                                                                                                                                                                                                                                                                                                                                                                                                                                                                                                                                                                                                                                                                                                                                                                                                                                  |                                                          |              |              |                   |
|--------------------------------------------------------------------------------------------------------------------------------------------------------------------------------------------------------------------------------------------------------------------------------------------------------------------------------------------------------------------------------------------------------------------------------------------------------------------------------------------------------------------------------------------------------------------------------------------------------------------------------------------------------------------------------------------------------------------------------------------------------------------------------------------------------------------------------------------------|----------------------------------------------------------|--------------|--------------|-------------------|
| <b>Chem. Name</b>                                                                                                                                                                                                                                                                                                                                                                                                                                                                                                                                                                                                                                                                                                                                                                                                                                | <b>1,2-diphenylethyne (3a)</b>                           |              |              |                   |
| <b>Lit. Ref.</b>                                                                                                                                                                                                                                                                                                                                                                                                                                                                                                                                                                                                                                                                                                                                                                                                                                 | <i>Green Chem.</i> , <b>2012</b> , <i>14</i> , 2840–2855 |              |              |                   |
| <p style="text-align: center;"> <math>\text{I-C}_6\text{H}_5</math> (1 eq. <b>1a</b>) + <math>\text{C}_6\text{H}_5\text{-C}\equiv\text{C-H}</math> (1.5 eq. <b>2a</b>) <math>\xrightarrow[\text{GVL (1 M), 60 }^\circ\text{C, 4 h, N}_2]{\text{Pd/C (0.5 mol\%), DABCO (1.2 eq.)}}</math> <math>\text{C}_6\text{H}_5\text{-C}\equiv\text{C-C}_6\text{H}_5</math> (<b>3a</b>)<br/> <b>M.W.: 178</b> </p>                                                                                                                                                                                                                                                                                                                                                                                                                                          |                                                          |              |              |                   |
| <b>METHOD:</b>                                                                                                                                                                                                                                                                                                                                                                                                                                                                                                                                                                                                                                                                                                                                                                                                                                   |                                                          |              |              |                   |
| <p>In a screw capped vial equipped with a magnetic stirrer Pd/C 10% wt. (5.3 mg, 0.005 mmol), GVL (1 mL, 98% purity), DABCO (139 mg, 1.2 mmol, 99% purity), iodobenzene (<b>1a</b>) (139 mg, 0.114 mL, 1 mmol, 98% purity), and ethynylbenzene (<b>2a</b>) (156 mg, 0.168 mL, 1.5 mmol, 98% purity) were consecutively added, the resulting mixture was purged with nitrogen and left under stirring at 60 °C. After 4 hours, petroleum ether was added and the reaction mixture was filtered over a small pad of celite, washed with neutral water and, subsequently, with acidic water (1 M HCl). The organic layer was dried over sodium sulphate and the solvent was removed under vacuum. The crude oil was purified by column chromatography on silica gel (petroleum ether) to afford <b>3a</b> as a white solid (124 mg, 70% yield).</p> |                                                          |              |              |                   |
| <b>Mol Formula</b>                                                                                                                                                                                                                                                                                                                                                                                                                                                                                                                                                                                                                                                                                                                                                                                                                               | C <sub>14</sub> H <sub>10</sub>                          | <b>m.p.</b>  | 61-63 °C     |                   |
| <b>Elemental Analysis:</b> Calc.: C: 94.34; H: 5.66; found C: 94.24; H: 5.60                                                                                                                                                                                                                                                                                                                                                                                                                                                                                                                                                                                                                                                                                                                                                                     |                                                          |              |              |                   |
| <b><sup>1</sup>H NMR 400 MHz CDCl<sub>3</sub></b>                                                                                                                                                                                                                                                                                                                                                                                                                                                                                                                                                                                                                                                                                                                                                                                                | <b>δ value</b>                                           | <b>No. H</b> | <b>Mult.</b> | <b>j value/Hz</b> |
|                                                                                                                                                                                                                                                                                                                                                                                                                                                                                                                                                                                                                                                                                                                                                                                                                                                  | 7.34-7.36                                                | 6            | <i>m</i>     |                   |
|                                                                                                                                                                                                                                                                                                                                                                                                                                                                                                                                                                                                                                                                                                                                                                                                                                                  | 7.53-7.55                                                | 4            | <i>m</i>     |                   |
| <b><sup>13</sup>C NMR (100.6 MHz, CDCl<sub>3</sub>) δ :</b> 89.37; 123.28; 128.25; 128.34; 131.61                                                                                                                                                                                                                                                                                                                                                                                                                                                                                                                                                                                                                                                                                                                                                |                                                          |              |              |                   |
| <b>GC-EIMS (m/z, %):</b> 178 (M <sup>+</sup> , 100), 177 (34), 176 (50), 152 (29), 151 (21), 150 (15), 126 (12), 89 (15)                                                                                                                                                                                                                                                                                                                                                                                                                                                                                                                                                                                                                                                                                                                         |                                                          |              |              |                   |

|                                                                                                                                                                                                                                                                                                                                                                                                                                                                                                                                                                                                                                                                                                                                                                                                                                                                  |                                                          |              |              |                   |
|------------------------------------------------------------------------------------------------------------------------------------------------------------------------------------------------------------------------------------------------------------------------------------------------------------------------------------------------------------------------------------------------------------------------------------------------------------------------------------------------------------------------------------------------------------------------------------------------------------------------------------------------------------------------------------------------------------------------------------------------------------------------------------------------------------------------------------------------------------------|----------------------------------------------------------|--------------|--------------|-------------------|
| <b>Chem. Name</b>                                                                                                                                                                                                                                                                                                                                                                                                                                                                                                                                                                                                                                                                                                                                                                                                                                                | <b>1-nitro-4-(phenylethynyl)benzene (3b)</b>             |              |              |                   |
| <b>Lit. Ref.</b>                                                                                                                                                                                                                                                                                                                                                                                                                                                                                                                                                                                                                                                                                                                                                                                                                                                 | <i>Green Chem.</i> , <b>2012</b> , <i>14</i> , 2840–2855 |              |              |                   |
| <p style="text-align: center;"> <math>\text{I-C}_6\text{H}_4\text{-NO}_2</math> (1 eq. <b>1b</b>) + <math>\text{C}_6\text{H}_5\text{-C}\equiv\text{C-H}</math> (1.5 eq. <b>2a</b>) <math>\xrightarrow[\text{GVL (1 M), 60 }^\circ\text{C, 2 h, N}_2]{\text{Pd/C (0.5 mol\%), DABCO (1.2 eq.)}}</math> <math>\text{O}_2\text{N-C}_6\text{H}_4\text{-C}\equiv\text{C-C}_6\text{H}_5</math> (<b>3b</b>)<br/> M.W.: 223 </p>                                                                                                                                                                                                                                                                                                                                                                                                                                         |                                                          |              |              |                   |
| <b>METHOD:</b>                                                                                                                                                                                                                                                                                                                                                                                                                                                                                                                                                                                                                                                                                                                                                                                                                                                   |                                                          |              |              |                   |
| <p>In a screw capped vial equipped with a magnetic stirrer Pd/C 10% wt. (5.3 mg, 0.005 mmol), GVL (1 mL, 98% purity), DABCO (139 mg, 1.2 mmol, 99% purity), 1-iodo-4-nitrobenzene (<b>1b</b>) (254 mg, 1 mmol, 98% purity), and ethynylbenzene (<b>2a</b>) (156 mg, 0.168 mL, 1.5 mmol, 98% purity) were consecutively added, the resulting mixture was purged with nitrogen and left under stirring at 60 °C. After 2 hours, petroleum ether was added and the reaction mixture was filtered over a small pad of celite, washed with neutral water and, subsequently, with acidic water (1 M HCl). The organic layer was dried over sodium sulphate and the solvent was removed under vacuum. The crude oil was purified by column chromatography on silica gel (1:1 / toluene / petroleum ether) to afford <b>3b</b> as a white solid (210 mg, 94% yield).</p> |                                                          |              |              |                   |
| <b>Mol Formula</b>                                                                                                                                                                                                                                                                                                                                                                                                                                                                                                                                                                                                                                                                                                                                                                                                                                               | $\text{C}_{14}\text{H}_9\text{NO}_2$                     | <b>m.p.</b>  | 116-118 °C   |                   |
| <b>Elemental Analysis:</b> Calc.: C: 75.33; H: 4.06; N:6.27; found C: 75.10; H: 4.99; N: 6.20                                                                                                                                                                                                                                                                                                                                                                                                                                                                                                                                                                                                                                                                                                                                                                    |                                                          |              |              |                   |
| <b><sup>1</sup>H NMR</b><br>400 MHz<br><b>CDCl<sub>3</sub></b>                                                                                                                                                                                                                                                                                                                                                                                                                                                                                                                                                                                                                                                                                                                                                                                                   | <b>δ value</b>                                           | <b>No. H</b> | <b>Mult.</b> | <b>j value/Hz</b> |
|                                                                                                                                                                                                                                                                                                                                                                                                                                                                                                                                                                                                                                                                                                                                                                                                                                                                  | 7.39-7.41                                                | 3            | <i>m</i>     |                   |
|                                                                                                                                                                                                                                                                                                                                                                                                                                                                                                                                                                                                                                                                                                                                                                                                                                                                  | 7.55-7.58                                                | 2            | <i>m</i>     |                   |
|                                                                                                                                                                                                                                                                                                                                                                                                                                                                                                                                                                                                                                                                                                                                                                                                                                                                  | 7.67                                                     | 2            | <i>d</i>     | 8.7               |
|                                                                                                                                                                                                                                                                                                                                                                                                                                                                                                                                                                                                                                                                                                                                                                                                                                                                  | 8.23                                                     | 2            | <i>d</i>     | 8.7               |
| <b><sup>13</sup>C NMR (100.6 MHz, CDCl<sub>3</sub>) δ :</b> 87.6, 94.7, 122.1, 123.6, 128.6, 129.3, 130.3, 131.9, 132.3, 147.0                                                                                                                                                                                                                                                                                                                                                                                                                                                                                                                                                                                                                                                                                                                                   |                                                          |              |              |                   |
| <b>GC-EIMS (m/z, %):</b> 223 (M <sup>+</sup> , 100), 193 (29), 176 (60), 165 (27), 177 (19), 151 (20), 150 (16)                                                                                                                                                                                                                                                                                                                                                                                                                                                                                                                                                                                                                                                                                                                                                  |                                                          |              |              |                   |

|                                                                                                                                                                                                                                                                                                                                                                                                                                                                                                                                                                                                                                                                                                                                                                                                                                                                       |                                                  |              |              |                   |
|-----------------------------------------------------------------------------------------------------------------------------------------------------------------------------------------------------------------------------------------------------------------------------------------------------------------------------------------------------------------------------------------------------------------------------------------------------------------------------------------------------------------------------------------------------------------------------------------------------------------------------------------------------------------------------------------------------------------------------------------------------------------------------------------------------------------------------------------------------------------------|--------------------------------------------------|--------------|--------------|-------------------|
| <b>Chem. Name</b>                                                                                                                                                                                                                                                                                                                                                                                                                                                                                                                                                                                                                                                                                                                                                                                                                                                     | <b>1-(4-(phenylethynyl)phenyl)ethanone (3c)</b>  |              |              |                   |
| <b>Lit. Ref.</b>                                                                                                                                                                                                                                                                                                                                                                                                                                                                                                                                                                                                                                                                                                                                                                                                                                                      | <i>Green Chem.</i> , <b>2012</b> , 14, 2840–2855 |              |              |                   |
| <p>1 eq. <b>1c</b> + 1.5 eq. <b>2a</b> <math>\xrightarrow[\text{GVL (1 M), 60^\circ\text{C}, 2.5 h, N_2}]{\text{Pd/C (0.5 mol\%), DABCO (1.2 eq.)}}</math> <b>3c</b><br/>M.W.: 220</p>                                                                                                                                                                                                                                                                                                                                                                                                                                                                                                                                                                                                                                                                                |                                                  |              |              |                   |
| <b>METHOD:</b>                                                                                                                                                                                                                                                                                                                                                                                                                                                                                                                                                                                                                                                                                                                                                                                                                                                        |                                                  |              |              |                   |
| <p>In a screw capped vial equipped with a magnetic stirrer Pd/C 10% wt. (5.3 mg, 0.005 mmol), GVL (1 mL, 98% purity), DABCO (139 mg, 1.2 mmol, 99% purity), 1-(4-iodophenyl)ethanone (<b>1c</b>) (251 mg, 1 mmol, 98% purity), and ethynylbenzene (<b>2a</b>) (156 mg, 0.168 mL, 1.5 mmol, 98% purity) were consecutively added, the resulting mixture was purged with nitrogen and left under stirring at 60 °C. After 2.5 hours, petroleum ether was added and the reaction mixture was filtered over a small pad of celite, washed with neutral water and, subsequently, with acidic water (1 M HCl). The organic layer was dried over sodium sulphate and the solvent was removed under vacuum. The crude oil was purified by column chromatography on silica gel (1:1 / toluene : petroleum ether) to afford <b>3c</b> as a white solid (209 mg, 95% yield).</p> |                                                  |              |              |                   |
| <b>Mol Formula</b>                                                                                                                                                                                                                                                                                                                                                                                                                                                                                                                                                                                                                                                                                                                                                                                                                                                    | C <sub>16</sub> H <sub>12</sub> O                | <b>m.p.</b>  | 98-101 °C    |                   |
| <b>Elemental Analysis:</b> Calc.: C, 87.25; H, 5.49; found C: 87.00; H: 5.40                                                                                                                                                                                                                                                                                                                                                                                                                                                                                                                                                                                                                                                                                                                                                                                          |                                                  |              |              |                   |
| <b><sup>1</sup>H NMR</b><br>400 MHz<br>CDCl <sub>3</sub>                                                                                                                                                                                                                                                                                                                                                                                                                                                                                                                                                                                                                                                                                                                                                                                                              | <b>δ value</b>                                   | <b>No. H</b> | <b>Mult.</b> | <b>j value/Hz</b> |
|                                                                                                                                                                                                                                                                                                                                                                                                                                                                                                                                                                                                                                                                                                                                                                                                                                                                       | 2.63                                             | 3            | <i>s</i>     |                   |
|                                                                                                                                                                                                                                                                                                                                                                                                                                                                                                                                                                                                                                                                                                                                                                                                                                                                       | 7.37-7.38                                        | 3            | <i>m</i>     |                   |
|                                                                                                                                                                                                                                                                                                                                                                                                                                                                                                                                                                                                                                                                                                                                                                                                                                                                       | 7.55-7.57                                        | 2            | <i>m</i>     |                   |
|                                                                                                                                                                                                                                                                                                                                                                                                                                                                                                                                                                                                                                                                                                                                                                                                                                                                       | 7.61                                             | 2            | <i>d</i>     | 8.3               |
|                                                                                                                                                                                                                                                                                                                                                                                                                                                                                                                                                                                                                                                                                                                                                                                                                                                                       | 7.94                                             | 2            | <i>d</i>     | 8.3               |
| <b><sup>13</sup>C NMR (100.6 MHz, CDCl<sub>3</sub>) δ :</b> 26.6, 88.6, 92.7, 122.6, 128.2, 128.3, 128.4, 128.8, 131.69, 131.73, 136.2, 197.3                                                                                                                                                                                                                                                                                                                                                                                                                                                                                                                                                                                                                                                                                                                         |                                                  |              |              |                   |
| <b>GC-EIMS (m/z, %):</b> 220 (M <sup>+</sup> , 61), 205 (100), 177 (24), 176 (55), 151 (21), 150 (17), 88 (10), 43 (10)                                                                                                                                                                                                                                                                                                                                                                                                                                                                                                                                                                                                                                                                                                                                               |                                                  |              |              |                   |

|                   |                                                         |
|-------------------|---------------------------------------------------------|
| <b>Chem. Name</b> | <b>4-(phenylethynyl)benzaldehyde (3d)</b>               |
| <b>Lit. Ref.</b>  | <i>Eur. J. Org. Chem.</i> , <b>2008</b> , 31, 5244-5253 |

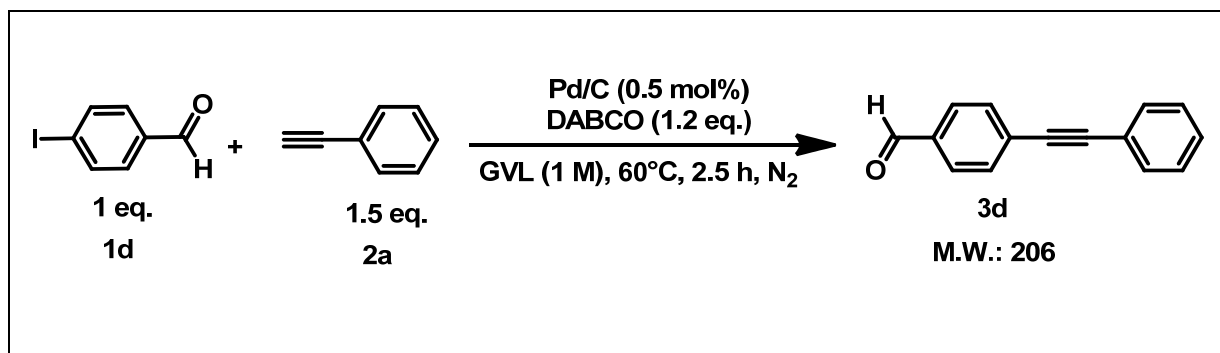

**METHOD:**

In a screw capped vial equipped with a magnetic stirrer Pd/C 10% wt. (5.3 mg, 0.005 mmol), GVL (1 mL, 98% purity), DABCO (139 mg, 1.2 mmol, 99% purity), 4-iodobenzaldehyde (**1d**) (234 mg, 1 mmol, 96% purity), and ethynylbenzene (**2a**) (156 mg, 0.168 mL, 1.5 mmol, 98% purity) were consecutively added, the resulting mixture was purged with nitrogen and left under stirring at 60 °C. After 2.5 hours, petroleum ether was added and the reaction mixture was filtered over a small pad of celite, washed with neutral water and, subsequently, with acidic water (1 M HCl). The organic layer was dried over sodium sulphate and the solvent was removed under vacuum. The crude oil was purified by column chromatography on silica gel (1:1 / toluene : petroleum ether) to afford **3d** as a white solid (186 mg, 90% yield).

|                    |                                   |             |          |
|--------------------|-----------------------------------|-------------|----------|
| <b>Mol Formula</b> | C <sub>15</sub> H <sub>10</sub> O | <b>m.p.</b> | 95-97 °C |
|--------------------|-----------------------------------|-------------|----------|

**Elemental Analysis:** Calc.: C, 87.36; H, 4.89; found C: 87.10; H:4.80

|                                                          | $\delta$ value | No. H | Mult.     | j value/Hz |
|----------------------------------------------------------|----------------|-------|-----------|------------|
| <b><sup>1</sup>H NMR</b><br>400 MHz<br>CDCl <sub>3</sub> | 7.38           | 3     | <i>br</i> |            |
|                                                          | 7.56           | 2     | <i>br</i> |            |
|                                                          | 7.68           | 2     | <i>d</i>  | 7.8        |
|                                                          | 7.87           | 2     | <i>d</i>  | 7.8        |
|                                                          | 10.02          | 1     | <i>s</i>  |            |

**<sup>13</sup>C NMR (100.6 MHz, CDCl<sub>3</sub>)  $\delta$  :** 88.5, 93.5, 122.5, 128.5, 129.0, 129.6, 131.8, 132.1, 135.4, 191.5

**GC-EIMS (m/z, %):** 206 (M<sup>+</sup>, 100), 205 (71), 178 (14), 177 (20), 176 (51), 151 (20), 150 (17)

|                   |                                                          |
|-------------------|----------------------------------------------------------|
| <b>Chem. Name</b> | <b>1-methyl-4-(phenylethynyl)benzene (3e)</b>            |
| <b>Lit. Ref.</b>  | <i>Green Chem.</i> , <b>2012</b> , <i>14</i> , 2840–2855 |

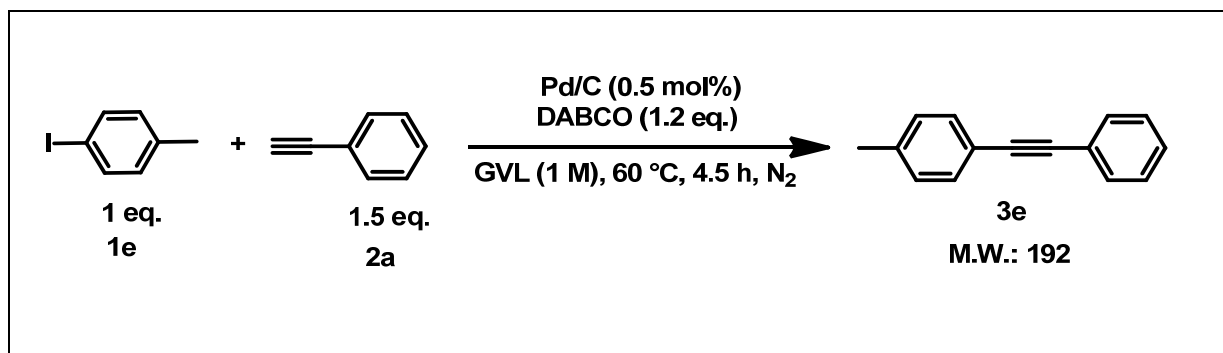

**METHOD:**

In a screw capped vial equipped with a magnetic stirrer Pd/C 10% wt. (5.3 mg, 0.005 mmol), GVL (1 mL, 98% purity), DABCO (139 mg, 1.2 mmol, 99% purity), 1-iodo-4-methylbenzene (**1e**) (220 mg, 1 mmol, 99% purity), and ethynylbenzene (**2a**) (156 mg, 0.168 mL, 1.5 mmol, 98% purity) were consecutively added, the resulting mixture was purged with nitrogen and left under stirring at 60 °C. After 4.5 hours, petroleum ether was added and the reaction mixture was filtered over a small pad of celite, washed with neutral water and, subsequently, with acidic water (1 M HCl). The organic layer was dried over sodium sulphate and the solvent was removed under vacuum. The crude oil was purified by column chromatography on silica gel (petroleum ether) to afford **3e** as a white solid (154 mg, 80% yield).

|                    |                                 |             |          |
|--------------------|---------------------------------|-------------|----------|
| <b>Mol Formula</b> | C <sub>15</sub> H <sub>12</sub> | <b>m.p.</b> | 67-70 °C |
|--------------------|---------------------------------|-------------|----------|

**Elemental Analysis:** Calc.: C: 93.71; H: 6.29; found C: 93.63; H: 6.19

|                                                                       | $\delta$ value | No. H | Mult. | j value/Hz |
|-----------------------------------------------------------------------|----------------|-------|-------|------------|
| <b><sup>1</sup>H NMR</b><br><b>400 MHz</b><br><b>CDCl<sub>3</sub></b> | 2.37           | 3     | s     |            |
|                                                                       | 7.16           | 2     | d     | 7.8        |
|                                                                       | 7.33-7.36      | 3     | m     |            |
|                                                                       | 7.43           | 2     | d     | 7.9        |
|                                                                       | 7.52-7.54      | 2     | m     |            |

**<sup>13</sup>C NMR (100.6 MHz, CDCl<sub>3</sub>)  $\delta$  :** 21.5, 88.7, 89.6, 120.2, 123.5, 128.1, 128.3, 129.1, 131.5, 131.6, 138.4

**GC-EIMS (m/z, %):** 192 (M<sup>+</sup>, 100), 191 (100), 190 (32), 189 (47), 165 (27), 115 (10), 94 (11), 82 (10)

|                   |                                                          |
|-------------------|----------------------------------------------------------|
| <b>Chem. Name</b> | <b>1-methoxy-4-(phenylethynyl)benzene (3f)</b>           |
| <b>Lit. Ref.</b>  | <i>Green Chem.</i> , <b>2012</b> , <i>14</i> , 2840–2855 |

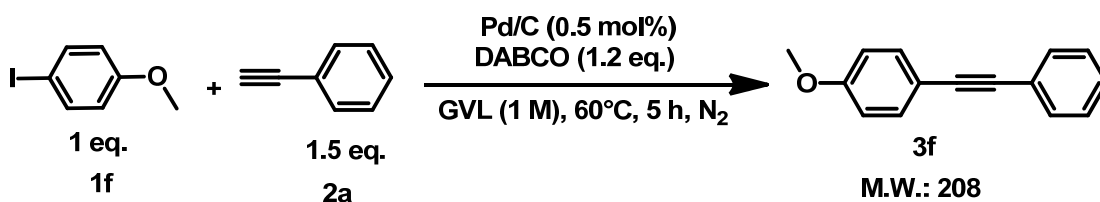

**METHOD:** In a screw capped vial equipped with a magnetic stirrer Pd/C 10% wt. (5.3 mg, 0.005 mmol), GVL (1 mL, 98% purity), DABCO (139 mg, 1.2 mmol, 99% purity), 1-iodo-4-methoxybenzene (**1f**) (238 mg, 1 mmol, 98% purity), and ethynylbenzene (**2a**) (156 mg, 0.168 mL, 1.5 mmol, 98% purity) were consecutively added, the resulting mixture was purged with nitrogen and left under stirring at 60 °C. After 5 hours, petroleum ether was added and the reaction mixture was filtered over a small pad of celite, washed with neutral water and, subsequently, with acidic water (1 M HCl). The organic layer was dried over sodium sulphate and the solvent was removed under vacuum. The crude oil was purified by column chromatography on silica gel (1:1 / toluene : petroleum ether) to afford **3f** as a white solid (156 mg, 75% yield).

|                    |                                   |             |          |
|--------------------|-----------------------------------|-------------|----------|
| <b>Mol Formula</b> | C <sub>15</sub> H <sub>12</sub> O | <b>m.p.</b> | 58-61 °C |
|--------------------|-----------------------------------|-------------|----------|

**Elemental Analysis:** Calc.: C: 86.51; H: 5.81; found C: 86.40; H: 5.75

|                                     | $\delta$ value | No. H | Mult. | j value/Hz |
|-------------------------------------|----------------|-------|-------|------------|
| <b><sup>1</sup>H NMR</b><br>400 MHz | 3.83           | 3     | s     |            |
|                                     | 6.88           | 2     | d     | 8.6        |
| <b>CDCl<sub>3</sub></b>             | 7.26-7.35      | 3     | m     |            |
|                                     | 7.46-7.52      | 4     | m     |            |

**<sup>13</sup>C NMR (100.6 MHz, CDCl<sub>3</sub>)  $\delta$  :** 55.3, 88.0, 89.3, 114.0, 115.4, 123.6, 127.9, 128.3, 131.4, 133.0, 159.6

**GC-EIMS (m/z, %):** 208 (M<sup>+</sup>, 100), 193 (10), 165 (48), 164 (17), 163 (13), 139 (13)

|                   |                                                        |
|-------------------|--------------------------------------------------------|
| <b>Chem. Name</b> | <b>2-(phenylethynyl)thiophene (3g)</b>                 |
| <b>Lit. Ref.</b>  | <i>Green Chem.</i> , <b>2010</b> , <i>12</i> , 985-991 |



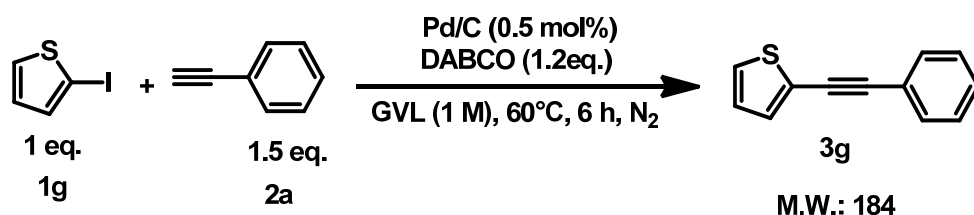

**METHOD:**

In a screw capped vial equipped with a magnetic stirrer Pd/C 10% wt. (5.3 mg, 0.005 mmol), GVL (1 mL, 98% purity), DABCO (139 mg, 1.2 mmol, 99% purity), 2-iodothiophene (**1g**) (215 mg, 0.113 mL, 1 mmol, 98% purity), and ethynylbenzene (**2a**) (156 mg, 0.168 mL, 1.5 mmol, 98% purity) were consecutively added, the resulting mixture was purged with nitrogen and left under stirring at 60 °C. After 6 hours, petroleum ether was added and the reaction mixture was filtered over a small pad of celite, washed with neutral water and, subsequently, with acidic water (1 M HCl). The organic layer was dried over sodium sulphate and the solvent was removed under vacuum. The crude oil was purified by column chromatography on silica gel (petroleum ether) to afford **3g** as a white solid (120 mg, 65% yield).

|                    |                                  |             |          |
|--------------------|----------------------------------|-------------|----------|
| <b>Mol Formula</b> | C <sub>12</sub> H <sub>8</sub> S | <b>m.p.</b> | 50-52 °C |
|--------------------|----------------------------------|-------------|----------|

**Elemental Analysis:** Calc.: C: 78.22; H: 4.38; S: 17.40 found C: 78.19; H: 4.30, S:17.38

|                                                          | $\delta$ value | No. H | Mult.    | j value/Hz |
|----------------------------------------------------------|----------------|-------|----------|------------|
| <b><sup>1</sup>H NMR</b><br>400 MHz<br>CDCl <sub>3</sub> | 7.00-7.02      | 1     | <i>m</i> |            |
|                                                          | 7.29-7.30      | 2     | <i>m</i> |            |
|                                                          | 7.34-7.35      | 3     | <i>m</i> |            |
|                                                          | 7.51-7.53      | 2     | <i>m</i> |            |

**<sup>13</sup>C NMR (100.6 MHz, CDCl<sub>3</sub>)  $\delta$  :** 82.6, 93.0, 122.9, 123.3, 127.1, 127.2, 128.4, 128.4, 129.2, 131.4, 131.9, 132.5

**GC-EIMS (m/z, %):** 184 (M<sup>+</sup>, 100), 183 (8), 152 (16), 139 (25), 126 (10), 113 (5), 98 (5)

|                                                                                                                                                                                                                                                                                                                                                                                                                                                                                                                                                                                                                                                                                                                                                                                                                                                                    |                                                          |              |              |                   |
|--------------------------------------------------------------------------------------------------------------------------------------------------------------------------------------------------------------------------------------------------------------------------------------------------------------------------------------------------------------------------------------------------------------------------------------------------------------------------------------------------------------------------------------------------------------------------------------------------------------------------------------------------------------------------------------------------------------------------------------------------------------------------------------------------------------------------------------------------------------------|----------------------------------------------------------|--------------|--------------|-------------------|
| <b>Chem. Name</b>                                                                                                                                                                                                                                                                                                                                                                                                                                                                                                                                                                                                                                                                                                                                                                                                                                                  | <b>1-nitro-4-(phenylethynyl)benzene (3b)</b>             |              |              |                   |
| <b>Lit. Ref.</b>                                                                                                                                                                                                                                                                                                                                                                                                                                                                                                                                                                                                                                                                                                                                                                                                                                                   | <i>Green Chem.</i> , <b>2012</b> , <i>14</i> , 2840–2855 |              |              |                   |
| <p style="text-align: center;"> <math>\text{Br}-\text{C}_6\text{H}_4-\text{NO}_2</math> (1h) + <math>\text{C}_6\text{H}_5\text{C}\equiv\text{CH}</math> (2a) <math>\xrightarrow[\text{GVL (1 M), 60 }^\circ\text{C, 12 h, N}_2]{\text{Pd/C (0.5 mol\%), DABCO (1.2 eq.)}}</math> <math>\text{O}_2\text{N}-\text{C}_6\text{H}_4-\text{C}\equiv\text{C}-\text{C}_6\text{H}_5</math> (3b) </p> <p style="text-align: center;">M.W.: 223</p>                                                                                                                                                                                                                                                                                                                                                                                                                           |                                                          |              |              |                   |
| <b>METHOD:</b>                                                                                                                                                                                                                                                                                                                                                                                                                                                                                                                                                                                                                                                                                                                                                                                                                                                     |                                                          |              |              |                   |
| <p>In a screw capped vial equipped with a magnetic stirrer Pd/C 10% wt. (5.3 mg, 0.005 mmol), GVL (1 mL, 98% purity), DABCO (139 mg, 1.2 mmol, 99% purity), 1-Bromo-4-nitrobenzene (<b>1h</b>) (204 mg, 1 mmol, 99% purity), and ethynylbenzene (<b>2a</b>) (156 mg, 0.168 mL, 1.5 mmol, 98% purity) were consecutively added, the resulting mixture was purged with nitrogen and left under stirring at 60 °C. After 12 hours, petroleum ether was added and the reaction mixture was filtered over a small pad of celite, washed with neutral water and, subsequently, with acidic water (1 M HCl). The organic layer was dried over sodium sulphate and the solvent was removed under vacuum. The crude oil was purified by column chromatography on silica gel (1:1 / toluene / petroleum ether) to afford <b>3b</b> as a white solid (167 mg, 75% yield).</p> |                                                          |              |              |                   |
| <b>Mol Formula</b>                                                                                                                                                                                                                                                                                                                                                                                                                                                                                                                                                                                                                                                                                                                                                                                                                                                 | $\text{C}_{14}\text{H}_9\text{NO}_2$                     | <b>m.p.</b>  | 116-118 °C   |                   |
| <b>Elemental Analysis:</b> Calc.: C: 75.33; H: 4.06; N:6.27; found C: 75.10; H: 4.99; N: 6.20                                                                                                                                                                                                                                                                                                                                                                                                                                                                                                                                                                                                                                                                                                                                                                      |                                                          |              |              |                   |
| <b><sup>1</sup>H NMR</b><br>400 MHz<br><b>CDCl<sub>3</sub></b>                                                                                                                                                                                                                                                                                                                                                                                                                                                                                                                                                                                                                                                                                                                                                                                                     | <b>δ value</b>                                           | <b>No. H</b> | <b>Mult.</b> | <b>j value/Hz</b> |
|                                                                                                                                                                                                                                                                                                                                                                                                                                                                                                                                                                                                                                                                                                                                                                                                                                                                    | 7.39-7.41                                                | 3            | <i>m</i>     |                   |
|                                                                                                                                                                                                                                                                                                                                                                                                                                                                                                                                                                                                                                                                                                                                                                                                                                                                    | 7.55-7.58                                                | 2            | <i>m</i>     |                   |
|                                                                                                                                                                                                                                                                                                                                                                                                                                                                                                                                                                                                                                                                                                                                                                                                                                                                    | 7.67                                                     | 2            | <i>d</i>     | 8.7               |
|                                                                                                                                                                                                                                                                                                                                                                                                                                                                                                                                                                                                                                                                                                                                                                                                                                                                    | 8.23                                                     | 2            | <i>d</i>     | 8.7               |
| <b><sup>13</sup>C NMR (100.6 MHz, CDCl<sub>3</sub>) δ :</b> 87.6, 94.7, 122.1, 123.6, 128.6, 129.3, 130.24, 131.9, 132.3, 147.0                                                                                                                                                                                                                                                                                                                                                                                                                                                                                                                                                                                                                                                                                                                                    |                                                          |              |              |                   |
| <b>GC-EIMS (m/z, %):</b> 223 (M <sup>+</sup> , 100), 193 (29), 176 (60), 165 (27), 177 (19), 151 (20), 150 (16)                                                                                                                                                                                                                                                                                                                                                                                                                                                                                                                                                                                                                                                                                                                                                    |                                                          |              |              |                   |

|                   |                                                                 |
|-------------------|-----------------------------------------------------------------|
| <b>Chem. Name</b> | <b>4-(phenylethynyl)benzaldehyde (3d)</b>                       |
| <b>Lit. Ref.</b>  | <i>Eur. J. Org. Chem.</i> , <b>2008</b> , <i>31</i> , 5244-5253 |

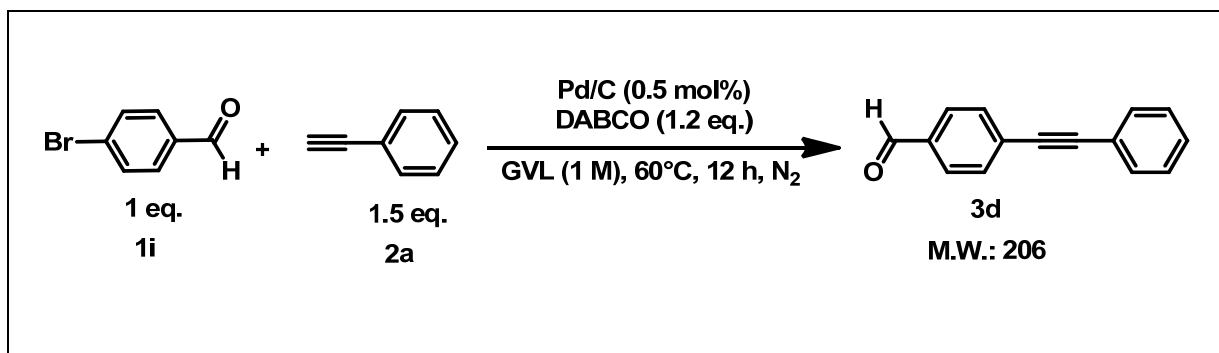

**METHOD:**

In a screw capped vial equipped with a magnetic stirrer Pd/C 10% wt. (5.3 mg, 0.005 mmol), GVL (1 mL, 98% purity), DABCO (139 mg, 1.2 mmol 4-Bromobenzaldehyde (**1i**) (187 mg, 1 mmol, 99% purity), and ethynylbenzene (**2a**) (156 mg, 0.168 mL, 1.5 mmol, 98% purity) were consecutively added, the resulting mixture was purged with nitrogen and left under stirring at 60 °C. After 12 hours, petroleum ether was added and the reaction mixture was filtered over a small pad of celite, washed with neutral water and, subsequently, with acidic water (1 M HCl). The organic layer was dried over sodium sulphate and the solvent was removed under vacuum. The crude oil was purified by column chromatography on silica gel (1:1 / toluene : petroleum ether) to afford **3d** as a white solid (145 mg, 70% yield).

|                    |                                   |             |          |
|--------------------|-----------------------------------|-------------|----------|
| <b>Mol Formula</b> | C <sub>15</sub> H <sub>10</sub> O | <b>m.p.</b> | 95-97 °C |
|--------------------|-----------------------------------|-------------|----------|

**Elemental Analysis:** Calc.: C, 87.36; H, 4.89; found C: 87.10; H:4.80

|                                                                       | δ value | No. H | Mult.     | j value/Hz |  |
|-----------------------------------------------------------------------|---------|-------|-----------|------------|--|
| <b><sup>1</sup>H NMR</b><br><b>400 MHz</b><br><b>CDCl<sub>3</sub></b> | 7.38    | 3     | <i>br</i> |            |  |
|                                                                       | 7.55    | 2     | <i>br</i> |            |  |
|                                                                       | 7.68    | 2     | <i>d</i>  | 7.8        |  |
|                                                                       | 7.87    | 2     | <i>d</i>  | 7.8        |  |
|                                                                       | 10.02   | 1     | <i>s</i>  |            |  |

**<sup>13</sup>C NMR (100.6 MHz, CDCl<sub>3</sub>) δ :** 88.5, 93.5, 122.5, 128.5, 129.0, 129.6, 131.8, 132.1, 135.4, 191.5

**GC-EIMS (m/z, %):** 206 (M<sup>+</sup>, 100), 205 (71), 178 (14), 177 (20), 176 (51), 151 (20), 150 (17)

|                                                                                                                                                                                                                                                                                                                                                                                                                                                                                                                                                                                                                                                                                                                                                                                                                                                                                        |                                                            |              |              |                   |
|----------------------------------------------------------------------------------------------------------------------------------------------------------------------------------------------------------------------------------------------------------------------------------------------------------------------------------------------------------------------------------------------------------------------------------------------------------------------------------------------------------------------------------------------------------------------------------------------------------------------------------------------------------------------------------------------------------------------------------------------------------------------------------------------------------------------------------------------------------------------------------------|------------------------------------------------------------|--------------|--------------|-------------------|
| <b>Chem. Name</b>                                                                                                                                                                                                                                                                                                                                                                                                                                                                                                                                                                                                                                                                                                                                                                                                                                                                      | <b>1-(phenylethynyl)-2-(trifluoromethyl)benzene (3h)</b>   |              |              |                   |
| <b>Lit. Ref.</b>                                                                                                                                                                                                                                                                                                                                                                                                                                                                                                                                                                                                                                                                                                                                                                                                                                                                       | <i>Chem. Eur. J.</i> , <b>2008</b> , <i>14</i> , 6994-6999 |              |              |                   |
| <p style="text-align: center;"> <math>\text{Pd/C (0.5 mol\%)}</math><br/> <math>\text{DABCO (1.2 eq.)}</math><br/> <math>\text{GVL (1 M), 60 }^\circ\text{C, 4 h, N}_2</math> </p> <p style="text-align: center;"> <b>1 eq. 1a</b>      <b>1.5 eq. 2b</b>      <b>3h</b><br/> <b>M.W.: 246</b> </p>                                                                                                                                                                                                                                                                                                                                                                                                                                                                                                                                                                                    |                                                            |              |              |                   |
| <b>METHOD:</b>                                                                                                                                                                                                                                                                                                                                                                                                                                                                                                                                                                                                                                                                                                                                                                                                                                                                         |                                                            |              |              |                   |
| <p>In a screw capped vial equipped with a magnetic stirrer Pd/C 10% wt. (5.3 mg, 0.005 mmol), GVL (1 mL, 98% purity), DABCO (139 mg, 1.2 mmol, 99% purity), iodobenzene (<b>1a</b>) (139 mg, 0.114 mL, 1 mmol, 98% purity), and 1-ethynyl-2-(trifluoromethyl)benzene (<b>2b</b>) (263 mg, 0.215 mL, 1.5 mmol, 97% purity) were consecutively added, the resulting mixture was purged with nitrogen and left under stirring at 60 °C. After 4 hours, petroleum ether was added and the reaction mixture was filtered over a small pad of celite, washed with neutral water and, subsequently, with acidic water (1 M HCl). The organic layer was dried over sodium sulphate and the solvent was removed under vacuum. The crude oil was purified by column chromatography on silica gel (1:1 / petroleum ether : toluene) to obtain <b>3h</b> as a white solid (182 mg, 74% yield).</p> |                                                            |              |              |                   |
| <b>Mol Formula</b>                                                                                                                                                                                                                                                                                                                                                                                                                                                                                                                                                                                                                                                                                                                                                                                                                                                                     | C <sub>15</sub> H <sub>9</sub> F <sub>3</sub>              | <b>m.p.</b>  | 70-73 °C     |                   |
| <b>Elemental Analysis:</b> Calc.: C: 73.17; H: 3.68; found C: 73.00; H: 3.60                                                                                                                                                                                                                                                                                                                                                                                                                                                                                                                                                                                                                                                                                                                                                                                                           |                                                            |              |              |                   |
| <b><sup>1</sup>H NMR</b><br><b>400 MHz</b><br><b>CDCl<sub>3</sub></b>                                                                                                                                                                                                                                                                                                                                                                                                                                                                                                                                                                                                                                                                                                                                                                                                                  | <b>δ value</b>                                             | <b>No. H</b> | <b>Mult.</b> | <b>j value/Hz</b> |
|                                                                                                                                                                                                                                                                                                                                                                                                                                                                                                                                                                                                                                                                                                                                                                                                                                                                                        | 7.36-7.43                                                  | 4            | <i>m</i>     |                   |
|                                                                                                                                                                                                                                                                                                                                                                                                                                                                                                                                                                                                                                                                                                                                                                                                                                                                                        | 7.50-7.56                                                  | 3            | <i>m</i>     |                   |
|                                                                                                                                                                                                                                                                                                                                                                                                                                                                                                                                                                                                                                                                                                                                                                                                                                                                                        | 7.66-7.69                                                  | 2            | <i>m</i>     |                   |
| <b><sup>13</sup>C NMR (100.6 MHz, CDCl<sub>3</sub>) δ:</b> 85.3; 94.9; 121.6, 122.2, 122.7; 125.0, 125.9 (q, <i>j</i> <sub>F-C</sub> = 5.0 Hz), 127.9, 128.4, 128.8, 131.4, 131.7, 133.7                                                                                                                                                                                                                                                                                                                                                                                                                                                                                                                                                                                                                                                                                               |                                                            |              |              |                   |
| <b><sup>19</sup>F NMR(376.4, CDCl<sub>3</sub>) δ :</b> -62.7                                                                                                                                                                                                                                                                                                                                                                                                                                                                                                                                                                                                                                                                                                                                                                                                                           |                                                            |              |              |                   |
| <b>GC-EIMS (m/z, %):</b> 246 (M <sup>+</sup> , 100), 245 (51), 227 (18), 225 (23), 207 (6), 196 (10)                                                                                                                                                                                                                                                                                                                                                                                                                                                                                                                                                                                                                                                                                                                                                                                   |                                                            |              |              |                   |

|                   |                                                                   |
|-------------------|-------------------------------------------------------------------|
| <b>Chem. Name</b> | <b>1-((4-nitrophenyl)ethynyl)-2-(trifluoromethyl)benzene (3i)</b> |
| <b>Lit. Ref.</b>  | <i>Chem. Eur. J.</i> , <b>2008</b> , <i>14</i> , 6994-6999        |

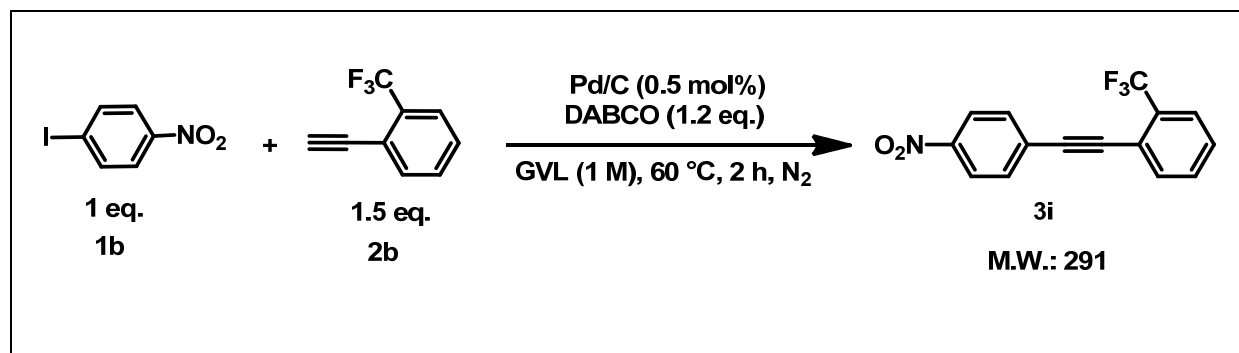

**METHOD:**

In a screw capped vial equipped with a magnetic stirrer Pd/C 10% wt. (5.3 mg, 0.005 mmol), GVL (1 mL, 98% purity), DABCO (139 mg, 1.2 mmol, 99% purity), 1-iodo-4-nitrobenzene (**1b**) (254 mg, 1 mmol, 98% purity), and 1-ethynyl-2-(trifluoromethyl)benzene (**2b**) (263 mg, 0.215 mL, 1.5 mmol, 97% purity) were consecutively added, the resulting mixture was purged with nitrogen and left under stirring at 60 °C. After 2 hours, petroleum ether was added and the reaction mixture was filtered over a small pad of celite, washed with neutral water and, subsequently, with acidic water (1 M HCl). The organic layer was dried over sodium sulphate and the solvent was removed under vacuum. The crude oil was purified by column chromatography on silica gel (1:1 / petroleum ether: toluene) to afford **3i** as a pale yellow solid (265 mg, 91% yield).

|                    |                                                               |             |          |
|--------------------|---------------------------------------------------------------|-------------|----------|
| <b>Mol Formula</b> | C <sub>15</sub> H <sub>8</sub> F <sub>3</sub> NO <sub>2</sub> | <b>m.p.</b> | 95-98 °C |
|--------------------|---------------------------------------------------------------|-------------|----------|

**Elemental Analysis:** Calc.: C: 61.86; H: 2.77; N: 4.81; found C: 61.76; H: 2.70; N: 4.79

|                                                          | $\delta$ value | No. H | Mult.    | j value/Hz |
|----------------------------------------------------------|----------------|-------|----------|------------|
| <b><sup>1</sup>H NMR</b><br>400 MHz<br>CDCl <sub>3</sub> | 7.47-7.51      | 1     | <i>m</i> |            |
|                                                          | 7.54-7.58      | 1     | <i>m</i> |            |
|                                                          | 7.66-7.73      | 4     | <i>m</i> |            |
|                                                          | 8.23           | 2     | <i>d</i> | 8.5        |

**<sup>13</sup>C NMR (100.6 MHz, CDCl<sub>3</sub>)  $\delta$  :** 90.6, 93.0, 120.7, 122.5, 124.1, 125.2, 126.6 (q, *j*<sub>F-C</sub> = 4.9 Hz), 129.4, 129.9, 132.0, 132.4, 132.8, 134.4, 147.7

**<sup>19</sup>F NMR(376.4, CDCl<sub>3</sub>)  $\delta$  :** -62.6

**GC-EIMS (m/z, %):** 291 (M<sup>+</sup>, 100), 261 (19), 245 (24), 243 (10), 233 (24), 232 (24), 225 (34), 214 (12)

|                                                                                                                                                                                                                                                                                                                                                                                                                                                                                                                                                                                                                                                                                                                                                                                                                                                                                             |                                                                        |              |              |                   |
|---------------------------------------------------------------------------------------------------------------------------------------------------------------------------------------------------------------------------------------------------------------------------------------------------------------------------------------------------------------------------------------------------------------------------------------------------------------------------------------------------------------------------------------------------------------------------------------------------------------------------------------------------------------------------------------------------------------------------------------------------------------------------------------------------------------------------------------------------------------------------------------------|------------------------------------------------------------------------|--------------|--------------|-------------------|
| <b>Chem. Name</b>                                                                                                                                                                                                                                                                                                                                                                                                                                                                                                                                                                                                                                                                                                                                                                                                                                                                           | 1-(4-((2-(trifluoromethyl)phenyl)ethynyl)phenyl)ethanone ( <b>3j</b> ) |              |              |                   |
| <b>Lit. Ref.</b>                                                                                                                                                                                                                                                                                                                                                                                                                                                                                                                                                                                                                                                                                                                                                                                                                                                                            | <i>Chem. Eur. J.</i> , <b>2008</b> , 14, 6994-6999                     |              |              |                   |
| <p>1 eq. <b>1c</b> + 1.5 eq. <b>2b</b> <math>\xrightarrow[\text{GVL (1 M), 60}^\circ\text{C, 2.5 h, N}_2]{\text{Pd/C (0.5 mol\%), DABCO (1.2 eq.)}}</math> <b>3j</b><br/>M.W.: 288</p>                                                                                                                                                                                                                                                                                                                                                                                                                                                                                                                                                                                                                                                                                                      |                                                                        |              |              |                   |
| <b>METHOD:</b>                                                                                                                                                                                                                                                                                                                                                                                                                                                                                                                                                                                                                                                                                                                                                                                                                                                                              |                                                                        |              |              |                   |
| <p>In a screw capped vial equipped with a magnetic stirrer Pd/C 10% wt. (5.3 mg, 0.005 mmol), GVL (1 mL, 98% purity), DABCO (139 mg, 1.2 mmol, 99% purity), 1-(4-iodophenyl)ethanone (<b>1c</b>) (251 mg, 1 mmol, 98% purity), and 1-ethynyl-2-(trifluoromethyl)benzene (<b>2b</b>) (263 mg, 0.215 mL, 1.5 mmol, 97% purity) were consecutively added, the resulting mixture was purged with nitrogen and left under stirring at 60 °C. After 2.5 hours, petroleum ether was added and the reaction mixture was filtered over a small pad of celite, washed with neutral water and, subsequently, with acidic water (1 M HCl). The organic layer was dried over sodium sulphate and the solvent was removed under vacuum. The crude oil was purified by column chromatography on silica gel (1:1 / petroleum ether : toluene) to obtain <b>3j</b> as a white solid (277 mg, 96% yield).</p> |                                                                        |              |              |                   |
| <b>Mol Formula</b>                                                                                                                                                                                                                                                                                                                                                                                                                                                                                                                                                                                                                                                                                                                                                                                                                                                                          | C <sub>17</sub> H <sub>11</sub> F <sub>3</sub> O                       | <b>m.p.</b>  | 80-83 °C     |                   |
| <b>Elemental Analysis:</b> Calc.: C: 70.83; H: 3.85; found C:70.79; H: 3.80                                                                                                                                                                                                                                                                                                                                                                                                                                                                                                                                                                                                                                                                                                                                                                                                                 |                                                                        |              |              |                   |
| <b><sup>1</sup>H NMR</b><br>400 MHz<br>CDCl <sub>3</sub>                                                                                                                                                                                                                                                                                                                                                                                                                                                                                                                                                                                                                                                                                                                                                                                                                                    | <b>δ value</b>                                                         | <b>No. H</b> | <b>Mult.</b> | <b>j value/Hz</b> |
|                                                                                                                                                                                                                                                                                                                                                                                                                                                                                                                                                                                                                                                                                                                                                                                                                                                                                             | 2.62                                                                   | 3            | s            |                   |
|                                                                                                                                                                                                                                                                                                                                                                                                                                                                                                                                                                                                                                                                                                                                                                                                                                                                                             | 7.46-7.48                                                              | 1            | m            |                   |
|                                                                                                                                                                                                                                                                                                                                                                                                                                                                                                                                                                                                                                                                                                                                                                                                                                                                                             | 7.53-7.57                                                              | 1            | m            |                   |
|                                                                                                                                                                                                                                                                                                                                                                                                                                                                                                                                                                                                                                                                                                                                                                                                                                                                                             | 7.63                                                                   | 2            | d            | 8.1               |
|                                                                                                                                                                                                                                                                                                                                                                                                                                                                                                                                                                                                                                                                                                                                                                                                                                                                                             | 7.68-7.72                                                              | 2            | m            |                   |
|                                                                                                                                                                                                                                                                                                                                                                                                                                                                                                                                                                                                                                                                                                                                                                                                                                                                                             | 7.96                                                                   | 2            | d            | 8.1               |
| <b><sup>13</sup>C NMR (100.6 MHz, CDCl<sub>3</sub>) δ :</b> 26.7, 88.4, 93.8, 120.9, 122.2, 124.9, 126.0 (q, <i>j</i> <sub>C</sub> = 4.9 Hz), 127.5, 128.3, 128.5, 131.5, 131.8, 133.8, 136.6, 197.3                                                                                                                                                                                                                                                                                                                                                                                                                                                                                                                                                                                                                                                                                        |                                                                        |              |              |                   |
| <b><sup>19</sup>F NMR(376.4, CDCl<sub>3</sub>) δ :</b> -62.7                                                                                                                                                                                                                                                                                                                                                                                                                                                                                                                                                                                                                                                                                                                                                                                                                                |                                                                        |              |              |                   |
| <b>GC-EIMS (m/z, %):</b> 288 (M <sup>+</sup> , 49), 274 (17), 273 (100), 245 (29), 243 (8), 225 (29), 219 (6), 214 (6)                                                                                                                                                                                                                                                                                                                                                                                                                                                                                                                                                                                                                                                                                                                                                                      |                                                                        |              |              |                   |

|                                                                                                                                                                                                                                                                                                                                                                                                                                                                                                                                                                                                                                                                                                                                                                                                                                                                           |                                                                     |              |              |                   |
|---------------------------------------------------------------------------------------------------------------------------------------------------------------------------------------------------------------------------------------------------------------------------------------------------------------------------------------------------------------------------------------------------------------------------------------------------------------------------------------------------------------------------------------------------------------------------------------------------------------------------------------------------------------------------------------------------------------------------------------------------------------------------------------------------------------------------------------------------------------------------|---------------------------------------------------------------------|--------------|--------------|-------------------|
| <b>Chem. Name</b>                                                                                                                                                                                                                                                                                                                                                                                                                                                                                                                                                                                                                                                                                                                                                                                                                                                         | <b>1-(p-tolyethynyl)-2-(trifluoromethyl)benzene (3k)</b>            |              |              |                   |
| <b>Lit. Ref.</b>                                                                                                                                                                                                                                                                                                                                                                                                                                                                                                                                                                                                                                                                                                                                                                                                                                                          | <i>Appl. Organometal. Chem.</i> , <b>2011</b> , <i>25</i> , 514-520 |              |              |                   |
| <p style="text-align: center;"> <math>\text{1 eq. 1e} + \text{1.5 eq. 2b} \xrightarrow[\text{GVL (1 M), 60^\circ\text{C, 4.5 h, N}_2]{\text{Pd/C (0.5 mol\%), DABCO (1.2 eq.)}} \text{3k}</math><br/> <b>M.W.: 260</b> </p>                                                                                                                                                                                                                                                                                                                                                                                                                                                                                                                                                                                                                                               |                                                                     |              |              |                   |
| <b>METHOD:</b>                                                                                                                                                                                                                                                                                                                                                                                                                                                                                                                                                                                                                                                                                                                                                                                                                                                            |                                                                     |              |              |                   |
| <p>In a screw capped vial equipped with a magnetic stirrer Pd/C 10% wt. (5.3 mg, 0.005 mmol), GVL (1 mL, 98% purity), DABCO (139 mg, 1.2 mmol, 99% purity), 1-iodo-4-methylbenzene (<b>1e</b>) (220 mg, 1 mmol, 99% purity), and 1-ethynyl-2-(trifluoromethyl)benzene (<b>2b</b>) (263 mg, 0.215 mL, 1.5 mmol, 97% purity) were consecutively added, the resulting mixture was purged with nitrogen and left under stirring at 60 °C. After 4.5 hours, petroleum ether was added and the reaction mixture was filtered over a small pad of celite, washed with neutral water and, subsequently, with acidic water (1 M HCl). The organic layer was dried over sodium sulphate and the solvent was removed under vacuum. The crude oil was purified by column chromatography on silica gel (petroleum ether) to afford <b>3k</b> as a white solid (182 mg, 70% yield).</p> |                                                                     |              |              |                   |
| <b>Mol Formula</b>                                                                                                                                                                                                                                                                                                                                                                                                                                                                                                                                                                                                                                                                                                                                                                                                                                                        | C <sub>16</sub> H <sub>11</sub> F <sub>3</sub>                      | <b>m.p.</b>  | 73-75 °C     |                   |
| <b>Elemental Analysis:</b> Calc.: C: 73.84; H: 4.26; found C: 73.79; H: 4.25                                                                                                                                                                                                                                                                                                                                                                                                                                                                                                                                                                                                                                                                                                                                                                                              |                                                                     |              |              |                   |
| <b><sup>1</sup>H NMR</b><br>400 MHz<br>CDCl <sub>3</sub>                                                                                                                                                                                                                                                                                                                                                                                                                                                                                                                                                                                                                                                                                                                                                                                                                  | <b>δ value</b>                                                      | <b>No. H</b> | <b>Mult.</b> | <b>j value/Hz</b> |
|                                                                                                                                                                                                                                                                                                                                                                                                                                                                                                                                                                                                                                                                                                                                                                                                                                                                           | 2.38                                                                | 3            | s            |                   |
|                                                                                                                                                                                                                                                                                                                                                                                                                                                                                                                                                                                                                                                                                                                                                                                                                                                                           | 7.18                                                                | 2            | d            | 7.6               |
|                                                                                                                                                                                                                                                                                                                                                                                                                                                                                                                                                                                                                                                                                                                                                                                                                                                                           | 7.38-7.53                                                           | 4            | m            |                   |
|                                                                                                                                                                                                                                                                                                                                                                                                                                                                                                                                                                                                                                                                                                                                                                                                                                                                           | 7.65-7.69                                                           | 2            | m            |                   |
| <b><sup>13</sup>C NMR (100.6 MHz, CDCl<sub>3</sub>) δ :</b> 21.5, 84.8, 95.2, 119.7, 121.8, 122.3, 125.0, 125.9 (q, <i>j</i> <sub>F-C</sub> = 4.8 Hz), 127.7, 129.2, 131.4, 131.6, 133.6, 139.1                                                                                                                                                                                                                                                                                                                                                                                                                                                                                                                                                                                                                                                                           |                                                                     |              |              |                   |
| <b><sup>19</sup>F NMR(376.4, CDCl<sub>3</sub>) δ :</b> -62.6                                                                                                                                                                                                                                                                                                                                                                                                                                                                                                                                                                                                                                                                                                                                                                                                              |                                                                     |              |              |                   |
| <b>GC-EIMS (m/z, %):</b> 260 (M <sup>+</sup> , 100), 259 (26), 239 (21), 238 (25), 221 (9), 220 (20), 189 (11)                                                                                                                                                                                                                                                                                                                                                                                                                                                                                                                                                                                                                                                                                                                                                            |                                                                     |              |              |                   |

|                   |                                                                     |
|-------------------|---------------------------------------------------------------------|
| <b>Chem. Name</b> | <b>1-((4-methoxyphenyl)ethynyl)-2-(trifluoromethyl)benzene (3I)</b> |
| <b>Lit. Ref.</b>  | <i>Chem. Eur. J.</i> , <b>2008</b> , <i>14</i> , 6994-6999          |
|                   |                                                                     |

**METHOD:**

In a screw capped vial equipped with a magnetic stirrer Pd/C 10% wt. (5.3 mg, 0.005 mmol), GVL (1 mL, 98% purity), DABCO (139 mg, 1.2 mmol, 99% purity), 1-iodo-4-methoxybenzene (**1f**) (238 mg, 1 mmol, 98% purity), and 1-ethynyl-2-(trifluoromethyl)benzene (**2b**) (263 mg, 0.215 mL, 1.5 mmol, 97% purity) were consecutively added, the resulting mixture was purged with nitrogen and left under stirring at 60 °C. After 5 hours, petroleum ether was added and the reaction mixture was filtered over a small pad of celite, washed with neutral water and, subsequently, with acidic water (1 M HCl). The organic layer was dried over sodium sulphate and the solvent was removed under vacuum. The crude oil was purified by column chromatography on silica gel (1:1 / petroleum ether : toluene) to afford **3I** as a white solid (180 mg, 65% yield).

|                    |                                                  |             |          |
|--------------------|--------------------------------------------------|-------------|----------|
| <b>Mol Formula</b> | C <sub>16</sub> H <sub>11</sub> F <sub>3</sub> O | <b>m.p.</b> | 64-67 °C |
|--------------------|--------------------------------------------------|-------------|----------|

**Elemental Analysis:** Calc.: C: 69.56; H: 4.01; found C: 69.49; H: 3.99

|                                                          | $\delta$ value | No. H | Mult.    | j value/Hz |
|----------------------------------------------------------|----------------|-------|----------|------------|
| <b><sup>1</sup>H NMR</b><br>400 MHz<br>CDCl <sub>3</sub> | 3.84           | 3     | <i>s</i> |            |
|                                                          | 6.89           | 2     | <i>d</i> | 8          |
|                                                          | 7.36-7.40      | 1     | <i>m</i> |            |
|                                                          | 7.49           | 3     | <i>d</i> | 8          |
|                                                          | 7.63-7.68      | 2     | <i>m</i> |            |

**<sup>13</sup>C NMR (100.6 MHz, CDCl<sub>3</sub>)  $\delta$  :** 55.3, 84.2, 95.1, 114.0, 114.8, 121.9, 122.3, 125.0, 125.9 (q,  $j_{F-C}$  = 4.8 Hz), 127.5, 131.3, 133.2, 133.4, 160.1

**<sup>19</sup>F NMR(376.4,CDCl<sub>3</sub>)  $\delta$  :** -62.9

**GC-EIMS (m/z, %):** 276 (M<sup>+</sup>, 100), 261 (19), 233 (27), 232 (43), 214 (9), 183 (14)

|                   |                                                             |
|-------------------|-------------------------------------------------------------|
| <b>Chem. Name</b> | <b>2-((2-(trifluoromethyl)phenyl)ethynyl)thiophene (3m)</b> |
|-------------------|-------------------------------------------------------------|



Lit. Ref.

Appl. Organometal. Chem., 2011, 25, 514-520

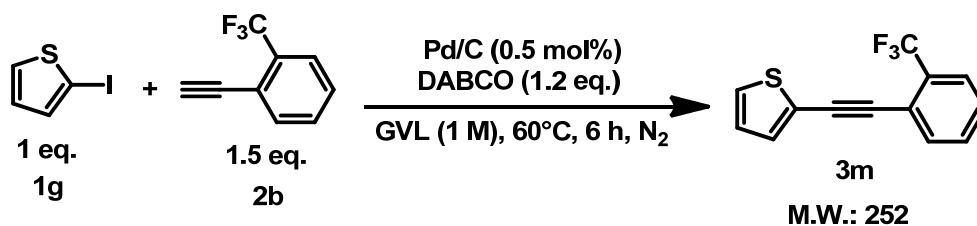

## METHOD:

In a screw capped vial equipped with a magnetic stirrer Pd/C 10% wt. (5.3 mg, 0.005 mmol), GVL (1 mL, 98% purity), DABCO (139 mg, 1.2 mmol, 99% purity), 2-iodothiophene (**1g**) (215 mg, 0.113 mL, 1 mmol, 98% purity), and 1-ethynyl-2-(trifluoromethyl)benzene (**2b**) (263 mg, 0.215 mL, 1.5 mmol, 97% purity) were consecutively added, the resulting mixture was purged with nitrogen and left under stirring at 60 °C. After 6 hours, petroleum ether was added and the reaction mixture was filtered over a small pad of celite, washed with neutral water and, subsequently, with acidic water (1 M HCl). The organic layer was dried over sodium sulphate and the solvent was removed under vacuum. The crude oil was purified by column chromatography on silica gel (petroleum ether) to obtain **3m** as a white solid (151 mg, 60% yield).

|                    |                                                 |             |          |
|--------------------|-------------------------------------------------|-------------|----------|
| <b>Mol Formula</b> | C <sub>13</sub> H <sub>7</sub> F <sub>3</sub> S | <b>m.p.</b> | 55-56 °C |
|--------------------|-------------------------------------------------|-------------|----------|

**Elemental Analysis:** Calc.: C: 61.90; H: 2.80; S: 12.71; found C: 61.88, H: 2.78, S: 12.67

|                                                          | $\delta$ value | No. H | Mult.    | j value/Hz |
|----------------------------------------------------------|----------------|-------|----------|------------|
| <b><sup>1</sup>H NMR</b><br>400 MHz<br>CDCl <sub>3</sub> | 7.04-7.06      | 1     | <i>m</i> |            |
|                                                          | 7.35-7.36      | 2     | <i>m</i> |            |
|                                                          | 7.42-7.43      | 1     | <i>m</i> |            |
|                                                          | 7.50-7.54      | 1     | <i>m</i> |            |
|                                                          | 7.65-7.70      | 2     | <i>m</i> |            |

**<sup>13</sup>C NMR (100.6 MHz, CDCl<sub>3</sub>)  $\delta$  :** 88.3, 89.1, 121.2, 122.2, 122.6, 124.9, 125.9 (q,  $j_{\text{C-F}} = 4.9$  Hz), 127.2, 128.0, 128.2, 131.4, 132.7, 133.4

**<sup>19</sup>F NMR (376.4, CDCl<sub>3</sub>)  $\delta$  :** -62.7

**GC-EIMS (m/z, %):** 252 (M<sup>+</sup>, 100), 233 (32), 219 (11), 207 (9), 206 (11), 202 (10), 188 (10)

|                                                                                                                                                                                                                                                                                                                                                                                                                                                                                                                                                                                                                                                                                                                                                                                                                                                                                          |                                                                   |              |              |                   |
|------------------------------------------------------------------------------------------------------------------------------------------------------------------------------------------------------------------------------------------------------------------------------------------------------------------------------------------------------------------------------------------------------------------------------------------------------------------------------------------------------------------------------------------------------------------------------------------------------------------------------------------------------------------------------------------------------------------------------------------------------------------------------------------------------------------------------------------------------------------------------------------|-------------------------------------------------------------------|--------------|--------------|-------------------|
| <b>Chem. Name</b>                                                                                                                                                                                                                                                                                                                                                                                                                                                                                                                                                                                                                                                                                                                                                                                                                                                                        | <b>1-((4-nitrophenyl)ethynyl)-2-(trifluoromethyl)benzene (3i)</b> |              |              |                   |
| <b>Lit. Ref.</b>                                                                                                                                                                                                                                                                                                                                                                                                                                                                                                                                                                                                                                                                                                                                                                                                                                                                         | <i>Chem. Eur. J.</i> , <b>2008</b> , <i>14</i> , 6994-6999        |              |              |                   |
| <p style="text-align: center;"> <math>\text{Br}-\text{C}_6\text{H}_4-\text{NO}_2</math> (1 eq. <b>1h</b>) + <math>\text{C}_6\text{H}_4(\text{F}_3\text{C})-\text{C}\equiv\text{CH}</math> (1.5 eq. <b>2b</b>) <math>\xrightarrow[\text{GVL (1 M), 60 }^\circ\text{C, 12 h, N}_2]{\text{Pd/C (0.5 mol\%), DABCO (1.2 eq.)}}</math> <math>\text{O}_2\text{N}-\text{C}_6\text{H}_4-\text{C}\equiv\text{C}-\text{C}_6\text{H}_4(\text{F}_3\text{C})</math> (<b>3i</b>)<br/> M.W.: 291 </p>                                                                                                                                                                                                                                                                                                                                                                                                   |                                                                   |              |              |                   |
| <b>METHOD:</b>                                                                                                                                                                                                                                                                                                                                                                                                                                                                                                                                                                                                                                                                                                                                                                                                                                                                           |                                                                   |              |              |                   |
| <p>In a screw capped vial equipped with a magnetic stirrer Pd/C 10% wt. (5.3 mg, 0.005 mmol), GVL (1 mL, 98% purity), DABCO (139 mg, 1.2 mmol, 99% purity), 1-bromo-4-nitrobenzene (<b>1h</b>) (204 mg, 1 mmol, 99% purity), and 1-ethynyl-2-(trifluoromethyl)benzene (<b>2b</b>) (263 mg, 0.215 mL, 1.5 mmol, 97% purity) were consecutively added, the resulting mixture was purged with nitrogen and left under stirring at 60 °C. After 12 hours, petroleum ether was added and the reaction mixture was filtered over a small pad of celite, washed with neutral water and, subsequently, with acidic water (1 M HCl). The organic layer was dried over sodium sulphate and the solvent was removed under vacuum. The crude oil was purified by column chromatography on silica gel (1:1 / petroleum ether : toluene) to afford <b>3i</b> as a white solid (224 mg, 77% yield).</p> |                                                                   |              |              |                   |
| <b>Mol Formula</b>                                                                                                                                                                                                                                                                                                                                                                                                                                                                                                                                                                                                                                                                                                                                                                                                                                                                       | C <sub>15</sub> H <sub>8</sub> F <sub>3</sub> NO <sub>2</sub>     | <b>m.p.</b>  | 95-98 °C     |                   |
| <b>Elemental Analysis:</b> Calc.: C: 61.86; H: 2.77; N: 4.81; found C: 61.76; H: 2.70; N: 4.79                                                                                                                                                                                                                                                                                                                                                                                                                                                                                                                                                                                                                                                                                                                                                                                           |                                                                   |              |              |                   |
| <b><sup>1</sup>H NMR</b><br>400 MHz<br>CDCl <sub>3</sub>                                                                                                                                                                                                                                                                                                                                                                                                                                                                                                                                                                                                                                                                                                                                                                                                                                 | <b>δ value</b>                                                    | <b>No. H</b> | <b>Mult.</b> | <b>j value/Hz</b> |
|                                                                                                                                                                                                                                                                                                                                                                                                                                                                                                                                                                                                                                                                                                                                                                                                                                                                                          | 7.47-7.51                                                         | 1            | <i>m</i>     |                   |
|                                                                                                                                                                                                                                                                                                                                                                                                                                                                                                                                                                                                                                                                                                                                                                                                                                                                                          | 7.54-7.58                                                         | 1            | <i>m</i>     |                   |
|                                                                                                                                                                                                                                                                                                                                                                                                                                                                                                                                                                                                                                                                                                                                                                                                                                                                                          | 7.66-7.73                                                         | 4            | <i>m</i>     |                   |
|                                                                                                                                                                                                                                                                                                                                                                                                                                                                                                                                                                                                                                                                                                                                                                                                                                                                                          | 8.23                                                              | 2            | <i>d</i>     | 8.5               |
| <b><sup>13</sup>C NMR (100.6 MHz, CDCl<sub>3</sub>) δ :</b> 90.6, 93.0, 120.7, 122.5, 124.1, 125.2, 126.6 (q, <i>j</i> <sub>F-C</sub> = 4.9 Hz), 129.4, 129.9, 132.0, 132.4, 132.8, 134.4, 147.7                                                                                                                                                                                                                                                                                                                                                                                                                                                                                                                                                                                                                                                                                         |                                                                   |              |              |                   |
| <b><sup>19</sup>F NMR(376.4, CDCl<sub>3</sub>) δ :</b> 62.6                                                                                                                                                                                                                                                                                                                                                                                                                                                                                                                                                                                                                                                                                                                                                                                                                              |                                                                   |              |              |                   |
| <b>GC-EIMS (m/z, %):</b> 291 (M <sup>+</sup> , 100), 261 (19), 245 (24), 243 (10), 233 (24), 232 (24), 225 (34), 214 (12)                                                                                                                                                                                                                                                                                                                                                                                                                                                                                                                                                                                                                                                                                                                                                                |                                                                   |              |              |                   |

|                                                                                                                                                                                                                                                                                                                                                                                                                                                                                                                                                                                                                                                                                                                                                                                                                                                      |                                                    |              |              |                   |
|------------------------------------------------------------------------------------------------------------------------------------------------------------------------------------------------------------------------------------------------------------------------------------------------------------------------------------------------------------------------------------------------------------------------------------------------------------------------------------------------------------------------------------------------------------------------------------------------------------------------------------------------------------------------------------------------------------------------------------------------------------------------------------------------------------------------------------------------------|----------------------------------------------------|--------------|--------------|-------------------|
| <b>Chem. Name</b>                                                                                                                                                                                                                                                                                                                                                                                                                                                                                                                                                                                                                                                                                                                                                                                                                                    | <b>1-nitro-4-(oct-1-ynyl)benzene (3n)</b>          |              |              |                   |
| <b>Lit. Ref.</b>                                                                                                                                                                                                                                                                                                                                                                                                                                                                                                                                                                                                                                                                                                                                                                                                                                     | <i>J. Org. Chem.</i> , <b>2004</b> , 69, 5752-5755 |              |              |                   |
| <p style="text-align: center;"> <math>\text{Pd/C (0.5 mol\%)}</math><br/> <math>\text{DABCO (2 eq.)}</math><br/> <math>\text{GVL (1 M), 60 }^\circ\text{C, 4.5 h, N}_2</math> </p> <p style="text-align: center;"> <b>1b</b>      <b>2c</b>      <b>3n</b><br/> <b>M.W.: 231</b> </p>                                                                                                                                                                                                                                                                                                                                                                                                                                                                                                                                                                |                                                    |              |              |                   |
| <b>METHOD:</b>                                                                                                                                                                                                                                                                                                                                                                                                                                                                                                                                                                                                                                                                                                                                                                                                                                       |                                                    |              |              |                   |
| <p>In a screw capped vial equipped with a magnetic stirrer Pd/C 10% wt. (5.3 mg, 0.005 mmol), GVL (1 mL, 98% purity), DABCO (231 mg, 2 mmol, 99% purity), 1-iodo-4-nitrobenzene (<b>1b</b>) (254 mg, 1 mmol, 98% purity), and oct-1-yne (<b>2c</b>) (172 mg, 0.230 mL, 1.5 mmol, 97% purity) were consecutively added, the resulting mixture was purged with nitrogen and left under stirring at 60 °C. After 4.5 hours, petroleum ether was added and the reaction mixture was filtered over a small pad of celite, washed with neutral water and, subsequently, with acidic water (1 M HCl). The organic layer was dried over sodium sulphate and the solvent was removed under vacuum. The crude oil was purified by column chromatography on silica gel (1:1 / petroleum ether : toluene) to afford <b>3n</b> as an oil (218 mg, 94% yield).</p> |                                                    |              |              |                   |
| <b>Mol Formula</b>                                                                                                                                                                                                                                                                                                                                                                                                                                                                                                                                                                                                                                                                                                                                                                                                                                   | C <sub>14</sub> H <sub>17</sub> NO <sub>2</sub>    | <b>m.p.</b>  | oil          |                   |
| <b>Elemental Analysis:</b> Calc.: C: 71.87; H: 6.96; N: 6.06; found C: 71.80; H: 6.90; N: 6.00                                                                                                                                                                                                                                                                                                                                                                                                                                                                                                                                                                                                                                                                                                                                                       |                                                    |              |              |                   |
| <b><sup>1</sup>H NMR</b><br><b>400 MHz</b><br><b>CDCl<sub>3</sub></b>                                                                                                                                                                                                                                                                                                                                                                                                                                                                                                                                                                                                                                                                                                                                                                                | <b>δ value</b>                                     | <b>No. H</b> | <b>Mult.</b> | <b>j value/Hz</b> |
|                                                                                                                                                                                                                                                                                                                                                                                                                                                                                                                                                                                                                                                                                                                                                                                                                                                      | 0.91                                               | 3            | <i>t</i>     | 6.6               |
|                                                                                                                                                                                                                                                                                                                                                                                                                                                                                                                                                                                                                                                                                                                                                                                                                                                      | 1.32-1.34                                          | 4            | <i>m</i>     |                   |
|                                                                                                                                                                                                                                                                                                                                                                                                                                                                                                                                                                                                                                                                                                                                                                                                                                                      | 1.42-1.49                                          | 2            | <i>m</i>     |                   |
|                                                                                                                                                                                                                                                                                                                                                                                                                                                                                                                                                                                                                                                                                                                                                                                                                                                      | 1.58 -1.66                                         | 2            | <i>m</i>     |                   |
|                                                                                                                                                                                                                                                                                                                                                                                                                                                                                                                                                                                                                                                                                                                                                                                                                                                      | 2.44                                               | 2            | <i>t</i>     | 7.1               |
|                                                                                                                                                                                                                                                                                                                                                                                                                                                                                                                                                                                                                                                                                                                                                                                                                                                      | 7.51                                               | 2            | <i>d</i>     | 8.7               |
| 8.15                                                                                                                                                                                                                                                                                                                                                                                                                                                                                                                                                                                                                                                                                                                                                                                                                                                 | 2                                                  | <i>d</i>     | 8.7          |                   |
| <b><sup>13</sup>C NMR (100.6 MHz, CDCl<sub>3</sub>) δ :</b> 14.0; 19.6; 22.5; 28.3; 28.6; 31.3; 79.3; 96.2; 123.5; 131.2; 132.2; 146.6                                                                                                                                                                                                                                                                                                                                                                                                                                                                                                                                                                                                                                                                                                               |                                                    |              |              |                   |
| <b>GC-EIMS (m/z, %):</b> 231 (M <sup>+</sup> , 21), 202 (60), 188 (51), 156 (45), 142 (71), 141 (53), 128 (100), 129 (54), 114 (45), 115 (75), 116 (46)                                                                                                                                                                                                                                                                                                                                                                                                                                                                                                                                                                                                                                                                                              |                                                    |              |              |                   |

|                                                                                                                                                                                                                                                                                                                                                                                                                                                                                                                                                                                                                                                                                                                                                                                                                                                         |                                                    |              |              |                   |
|---------------------------------------------------------------------------------------------------------------------------------------------------------------------------------------------------------------------------------------------------------------------------------------------------------------------------------------------------------------------------------------------------------------------------------------------------------------------------------------------------------------------------------------------------------------------------------------------------------------------------------------------------------------------------------------------------------------------------------------------------------------------------------------------------------------------------------------------------------|----------------------------------------------------|--------------|--------------|-------------------|
| <b>Chem. Name</b>                                                                                                                                                                                                                                                                                                                                                                                                                                                                                                                                                                                                                                                                                                                                                                                                                                       | <b>1-(4-(oct-1-ynyl)phenyl)ethanone (3o)</b>       |              |              |                   |
| <b>Lit. Ref.</b>                                                                                                                                                                                                                                                                                                                                                                                                                                                                                                                                                                                                                                                                                                                                                                                                                                        | <i>J. Org. Chem.</i> , <b>2004</b> , 69, 5752-5755 |              |              |                   |
| <p>1 eq. <b>1c</b> + 1.5 eq. <b>2c</b> <math>\xrightarrow[\text{GVL (1 M), 60 }^\circ\text{C, 4.5 h, N}_2]{\text{Pd/C (0.5 mol\%), DABCO (2 eq.)}}</math> <b>3o</b><br/>M.W.: 228</p>                                                                                                                                                                                                                                                                                                                                                                                                                                                                                                                                                                                                                                                                   |                                                    |              |              |                   |
| <b>METHOD:</b>                                                                                                                                                                                                                                                                                                                                                                                                                                                                                                                                                                                                                                                                                                                                                                                                                                          |                                                    |              |              |                   |
| <p>In a screw capped vial equipped with a magnetic stirrer Pd/C 10% wt. (5.3 mg, 0.005 mmol), GVL (1 mL, 98% purity), DABCO (231 mg, 2 mmol, 99% purity), 1-(4-iodophenyl)ethanone (<b>1c</b>) (251 mg, 1 mmol, 98% purity), and oct-1-yne (<b>2c</b>) (172 mg, 0.230 mL, 1.5 mmol, 97% purity) were consecutively added, the resulting mixture was purged with nitrogen and left under stirring at 60 °C. After 4.5 hours, petroleum ether was added and the reaction mixture was filtered over a small pad of celite, washed with neutral water and, subsequently, with acidic water (1 M HCl). The organic layer was dried over sodium sulphate and the solvent was removed under vacuum. The crude oil was purified by column chromatography on silica gel (1:1 / petroleum ether : toluene) to afford <b>3o</b> as an oil (220 mg, 96% yield).</p> |                                                    |              |              |                   |
| <b>Mol Formula</b>                                                                                                                                                                                                                                                                                                                                                                                                                                                                                                                                                                                                                                                                                                                                                                                                                                      | C <sub>16</sub> H <sub>20</sub> O                  | <b>m.p.</b>  | oil          |                   |
| <b>Elemental Analysis:</b> Calc.: C: 84.16; H: 8.83; found C: 84.10; H: 8.79                                                                                                                                                                                                                                                                                                                                                                                                                                                                                                                                                                                                                                                                                                                                                                            |                                                    |              |              |                   |
| <b><sup>1</sup>H NMR</b><br><b>400 MHz</b><br><b>CDCl<sub>3</sub></b>                                                                                                                                                                                                                                                                                                                                                                                                                                                                                                                                                                                                                                                                                                                                                                                   | <b>δ value</b>                                     | <b>No. H</b> | <b>Mult.</b> | <b>j value/Hz</b> |
|                                                                                                                                                                                                                                                                                                                                                                                                                                                                                                                                                                                                                                                                                                                                                                                                                                                         | 0.91                                               | 3            | <i>t</i>     | 6.4               |
|                                                                                                                                                                                                                                                                                                                                                                                                                                                                                                                                                                                                                                                                                                                                                                                                                                                         | 1.24-1.33                                          | 4            | <i>m</i>     |                   |
|                                                                                                                                                                                                                                                                                                                                                                                                                                                                                                                                                                                                                                                                                                                                                                                                                                                         | 1.42-1.49                                          | 2            | <i>m</i>     |                   |
|                                                                                                                                                                                                                                                                                                                                                                                                                                                                                                                                                                                                                                                                                                                                                                                                                                                         | 1.59-1.65                                          | 2            | <i>m</i>     |                   |
|                                                                                                                                                                                                                                                                                                                                                                                                                                                                                                                                                                                                                                                                                                                                                                                                                                                         | 2.43                                               | 2            | <i>t</i>     | 7.1               |
|                                                                                                                                                                                                                                                                                                                                                                                                                                                                                                                                                                                                                                                                                                                                                                                                                                                         | 2.61                                               | 3            | <i>s</i>     |                   |
|                                                                                                                                                                                                                                                                                                                                                                                                                                                                                                                                                                                                                                                                                                                                                                                                                                                         | 7.46                                               | 2            | <i>d</i>     | 8.2               |
| 7.87                                                                                                                                                                                                                                                                                                                                                                                                                                                                                                                                                                                                                                                                                                                                                                                                                                                    | 2                                                  | <i>d</i>     | 8.2          |                   |
| <b><sup>13</sup>C NMR (100.6 MHz, CDCl<sub>3</sub>) δ :</b> 14.0; 19.5; 22.5; 26.6; 28.5; 28.6; 31.3; 80.1; 94.4; 128.1; 129.2; 131.6; 135.6; 197.4                                                                                                                                                                                                                                                                                                                                                                                                                                                                                                                                                                                                                                                                                                     |                                                    |              |              |                   |
| <b>GC-EIMS (m/z, %):</b> 228 (M <sup>+</sup> , 26), 213 (48), 157 (25), 143 (25), 129 (51), 128 (28), 115 (28), 114 (33)                                                                                                                                                                                                                                                                                                                                                                                                                                                                                                                                                                                                                                                                                                                                |                                                    |              |              |                   |

| Chem. Name                                                                                                                                                                                                                                                                                                                                                                                                                                                                                                                                                                                                                                                                                                                                                                                                                                           | 1-(hex-1-ynyl)-4-nitrobenzene (3p)               |       |          |            |
|------------------------------------------------------------------------------------------------------------------------------------------------------------------------------------------------------------------------------------------------------------------------------------------------------------------------------------------------------------------------------------------------------------------------------------------------------------------------------------------------------------------------------------------------------------------------------------------------------------------------------------------------------------------------------------------------------------------------------------------------------------------------------------------------------------------------------------------------------|--------------------------------------------------|-------|----------|------------|
| Lit. Ref.                                                                                                                                                                                                                                                                                                                                                                                                                                                                                                                                                                                                                                                                                                                                                                                                                                            | <i>Tetrahedron</i> , <b>2013</b> , 69, 5178-5184 |       |          |            |
| <p>1 eq. <b>1b</b> + 1.5 eq. <b>2d</b> <math>\xrightarrow[\text{GVL (1 M), 60 }^\circ\text{C, 4.5 h, N}_2]{\text{Pd/C (0.5 mol\%), DABCO (2 eq.)}}</math> <b>3p</b><br/>M.W.: 203</p>                                                                                                                                                                                                                                                                                                                                                                                                                                                                                                                                                                                                                                                                |                                                  |       |          |            |
| METHOD:                                                                                                                                                                                                                                                                                                                                                                                                                                                                                                                                                                                                                                                                                                                                                                                                                                              |                                                  |       |          |            |
| <p>In a screw capped vial equipped with a magnetic stirrer Pd/C 10% wt. (5.3 mg, 0.005 mmol), GVL (1 mL, 98% purity), DABCO (231 mg, 2 mmol, 99% purity), 1-iodo-4-nitrobenzene (<b>1b</b>) (254 mg, 1 mmol, 98% purity), and hex-1-yne (<b>2d</b>) (127 mg, 0.178 mL, 1.5 mmol, 97% purity) were consecutively added, the resulting mixture was purged with nitrogen and left under stirring at 60 °C. After 4.5 hours, petroleum ether was added and the reaction mixture was filtered over a small pad of celite, washed with neutral water and, subsequently, with acidic water (1 M HCl). The organic layer was dried over sodium sulphate and the solvent was removed under vacuum. The crude oil was purified by column chromatography on silica gel (1:1 / petroleum ether : toluene) to afford <b>3p</b> as an oil (177 mg, 87% yield).</p> |                                                  |       |          |            |
| Mol Formula                                                                                                                                                                                                                                                                                                                                                                                                                                                                                                                                                                                                                                                                                                                                                                                                                                          | C <sub>12</sub> H <sub>13</sub> NO <sub>2</sub>  | m.p.  | oil      |            |
| <b>Elemental Analysis:</b> Calc.: C: 70.92; H: 6.45; N: 6.89; found C: 70.89; H: 6.40; N: 6.80                                                                                                                                                                                                                                                                                                                                                                                                                                                                                                                                                                                                                                                                                                                                                       |                                                  |       |          |            |
| <sup>1</sup> H NMR<br>400 MHz<br>CDCl <sub>3</sub>                                                                                                                                                                                                                                                                                                                                                                                                                                                                                                                                                                                                                                                                                                                                                                                                   | δ value                                          | No. H | Mult.    | j value/Hz |
|                                                                                                                                                                                                                                                                                                                                                                                                                                                                                                                                                                                                                                                                                                                                                                                                                                                      | 0.96                                             | 3     | <i>t</i> | 7.2        |
|                                                                                                                                                                                                                                                                                                                                                                                                                                                                                                                                                                                                                                                                                                                                                                                                                                                      | 1.45-1.53                                        | 2     | <i>m</i> |            |
|                                                                                                                                                                                                                                                                                                                                                                                                                                                                                                                                                                                                                                                                                                                                                                                                                                                      | 1.57-1.65                                        | 2     | <i>m</i> |            |
|                                                                                                                                                                                                                                                                                                                                                                                                                                                                                                                                                                                                                                                                                                                                                                                                                                                      | 2.45                                             | 2     | <i>t</i> | 7.1        |
|                                                                                                                                                                                                                                                                                                                                                                                                                                                                                                                                                                                                                                                                                                                                                                                                                                                      | 7.51                                             | 2     | <i>d</i> | 8.7        |
|                                                                                                                                                                                                                                                                                                                                                                                                                                                                                                                                                                                                                                                                                                                                                                                                                                                      | 8.14                                             | 2     | <i>d</i> | 8.7        |
| <sup>13</sup> C NMR (100.6 MHz, CDCl <sub>3</sub> ) δ :13.6; 19.2; 22.0; 30.4; 79.3; 96.8; 123.5; 131.2; 132.2; 146.5                                                                                                                                                                                                                                                                                                                                                                                                                                                                                                                                                                                                                                                                                                                                |                                                  |       |          |            |
| <b>GC-EIMS (m/z, %):</b> 203 (M <sup>+</sup> , 66), 188 (100), 156 (33), 142 (94), 128 (93), 114 (46), 115 (71), 102 (39), 63 (29)                                                                                                                                                                                                                                                                                                                                                                                                                                                                                                                                                                                                                                                                                                                   |                                                  |       |          |            |

|                                                                                                                                                                                                                                                                                                                                                                                                                                                                                                                                                                                                                                                                                                                                                                                                                                                                        |                                                     |              |              |                   |
|------------------------------------------------------------------------------------------------------------------------------------------------------------------------------------------------------------------------------------------------------------------------------------------------------------------------------------------------------------------------------------------------------------------------------------------------------------------------------------------------------------------------------------------------------------------------------------------------------------------------------------------------------------------------------------------------------------------------------------------------------------------------------------------------------------------------------------------------------------------------|-----------------------------------------------------|--------------|--------------|-------------------|
| <b>Chem. Name</b>                                                                                                                                                                                                                                                                                                                                                                                                                                                                                                                                                                                                                                                                                                                                                                                                                                                      | <b>trimethyl((4-nitrophenyl)ethynyl)silane (3q)</b> |              |              |                   |
| <b>Lit. Ref.</b>                                                                                                                                                                                                                                                                                                                                                                                                                                                                                                                                                                                                                                                                                                                                                                                                                                                       | <i>Synthesis</i> , 1980, 627-630                    |              |              |                   |
| <p style="text-align: center;"> <math>\text{I-C}_6\text{H}_4\text{-NO}_2</math> (1 eq. <b>1b</b>) + <math>\text{C}\equiv\text{C-Si(CH}_3\text{)}_3</math> (1.5 eq. <b>2e</b>) <math>\xrightarrow[\text{GVL (1 M), 60 }^\circ\text{C, 6 h, N}_2]{\text{Pd/C (0.5 mol\%), DABCO (2 eq.)}}</math> <math>\text{O}_2\text{N-C}_6\text{H}_4\text{-C}\equiv\text{C-Si(CH}_3\text{)}_3</math> (<b>3q</b>)<br/> <b>M.W.: 219</b> </p>                                                                                                                                                                                                                                                                                                                                                                                                                                           |                                                     |              |              |                   |
| <b>METHOD:</b>                                                                                                                                                                                                                                                                                                                                                                                                                                                                                                                                                                                                                                                                                                                                                                                                                                                         |                                                     |              |              |                   |
| <p>In a screw capped vial equipped with a magnetic stirrer Pd/C 10% wt. (5.3 mg, 0.005 mmol), GVL (1 mL, 98% purity), DABCO (231 mg, 2 mmol, 99% purity), 1-iodo-4-nitrobenzene (<b>1b</b>) (254 mg, 1 mmol, 98% purity), and ethynyltrimethylsilane (<b>2e</b>) (150 mg, 0.216 mL, 1.5 mmol, 98% purity) were consecutively added, the resulting mixture was purged with nitrogen and left under stirring at 60 °C. After 6 hours, petroleum ether was added and the reaction mixture was filtered over a small pad of celite, washed with neutral water and, subsequently, with acidic water (1 M HCl). The organic layer was dried over sodium sulphate and the solvent was removed under vacuum. The crude oil was purified by column chromatography on silica gel (1:1 / petroleum ether : toluene) to afford <b>3q</b> as a white solid (134 mg, 61% yield).</p> |                                                     |              |              |                   |
| <b>Mol Formula</b>                                                                                                                                                                                                                                                                                                                                                                                                                                                                                                                                                                                                                                                                                                                                                                                                                                                     | $\text{C}_{11}\text{H}_{13}\text{NO}_2\text{Si}$    | <b>m.p.</b>  | 98-100 °C    |                   |
| <b>Elemental Analysis:</b> Calc.: C: 60.24; H: 5.97; N: 6.39; found C: 60.00; H: 5.90; N: 6.00                                                                                                                                                                                                                                                                                                                                                                                                                                                                                                                                                                                                                                                                                                                                                                         |                                                     |              |              |                   |
| <b><sup>1</sup>H NMR</b><br>400 MHz<br>$\text{CDCl}_3$<br>$\text{CDCl}_3$                                                                                                                                                                                                                                                                                                                                                                                                                                                                                                                                                                                                                                                                                                                                                                                              | <b><math>\delta</math> value</b>                    | <b>No. H</b> | <b>Mult.</b> | <b>j value/Hz</b> |
|                                                                                                                                                                                                                                                                                                                                                                                                                                                                                                                                                                                                                                                                                                                                                                                                                                                                        | 0.27                                                | 9            | s            |                   |
|                                                                                                                                                                                                                                                                                                                                                                                                                                                                                                                                                                                                                                                                                                                                                                                                                                                                        | 7.59                                                | 2            | d            | 8.6               |
|                                                                                                                                                                                                                                                                                                                                                                                                                                                                                                                                                                                                                                                                                                                                                                                                                                                                        | 8.17                                                | 2            | d            | 8.6               |
| <b><sup>13</sup>C NMR (100.6 MHz, <math>\text{CDCl}_3</math>) <math>\delta</math> :</b> -0.3, 100.6, 102.7, 123.5, 130.0, 132.7, 147.1                                                                                                                                                                                                                                                                                                                                                                                                                                                                                                                                                                                                                                                                                                                                 |                                                     |              |              |                   |
| <b>GC-EIMS (m/z, %):</b> 219 ( $\text{M}^+$ , 16), 205 (22), 204 (100), 158 (35), 145 (9), 143 (17), 117 (7)                                                                                                                                                                                                                                                                                                                                                                                                                                                                                                                                                                                                                                                                                                                                                           |                                                     |              |              |                   |

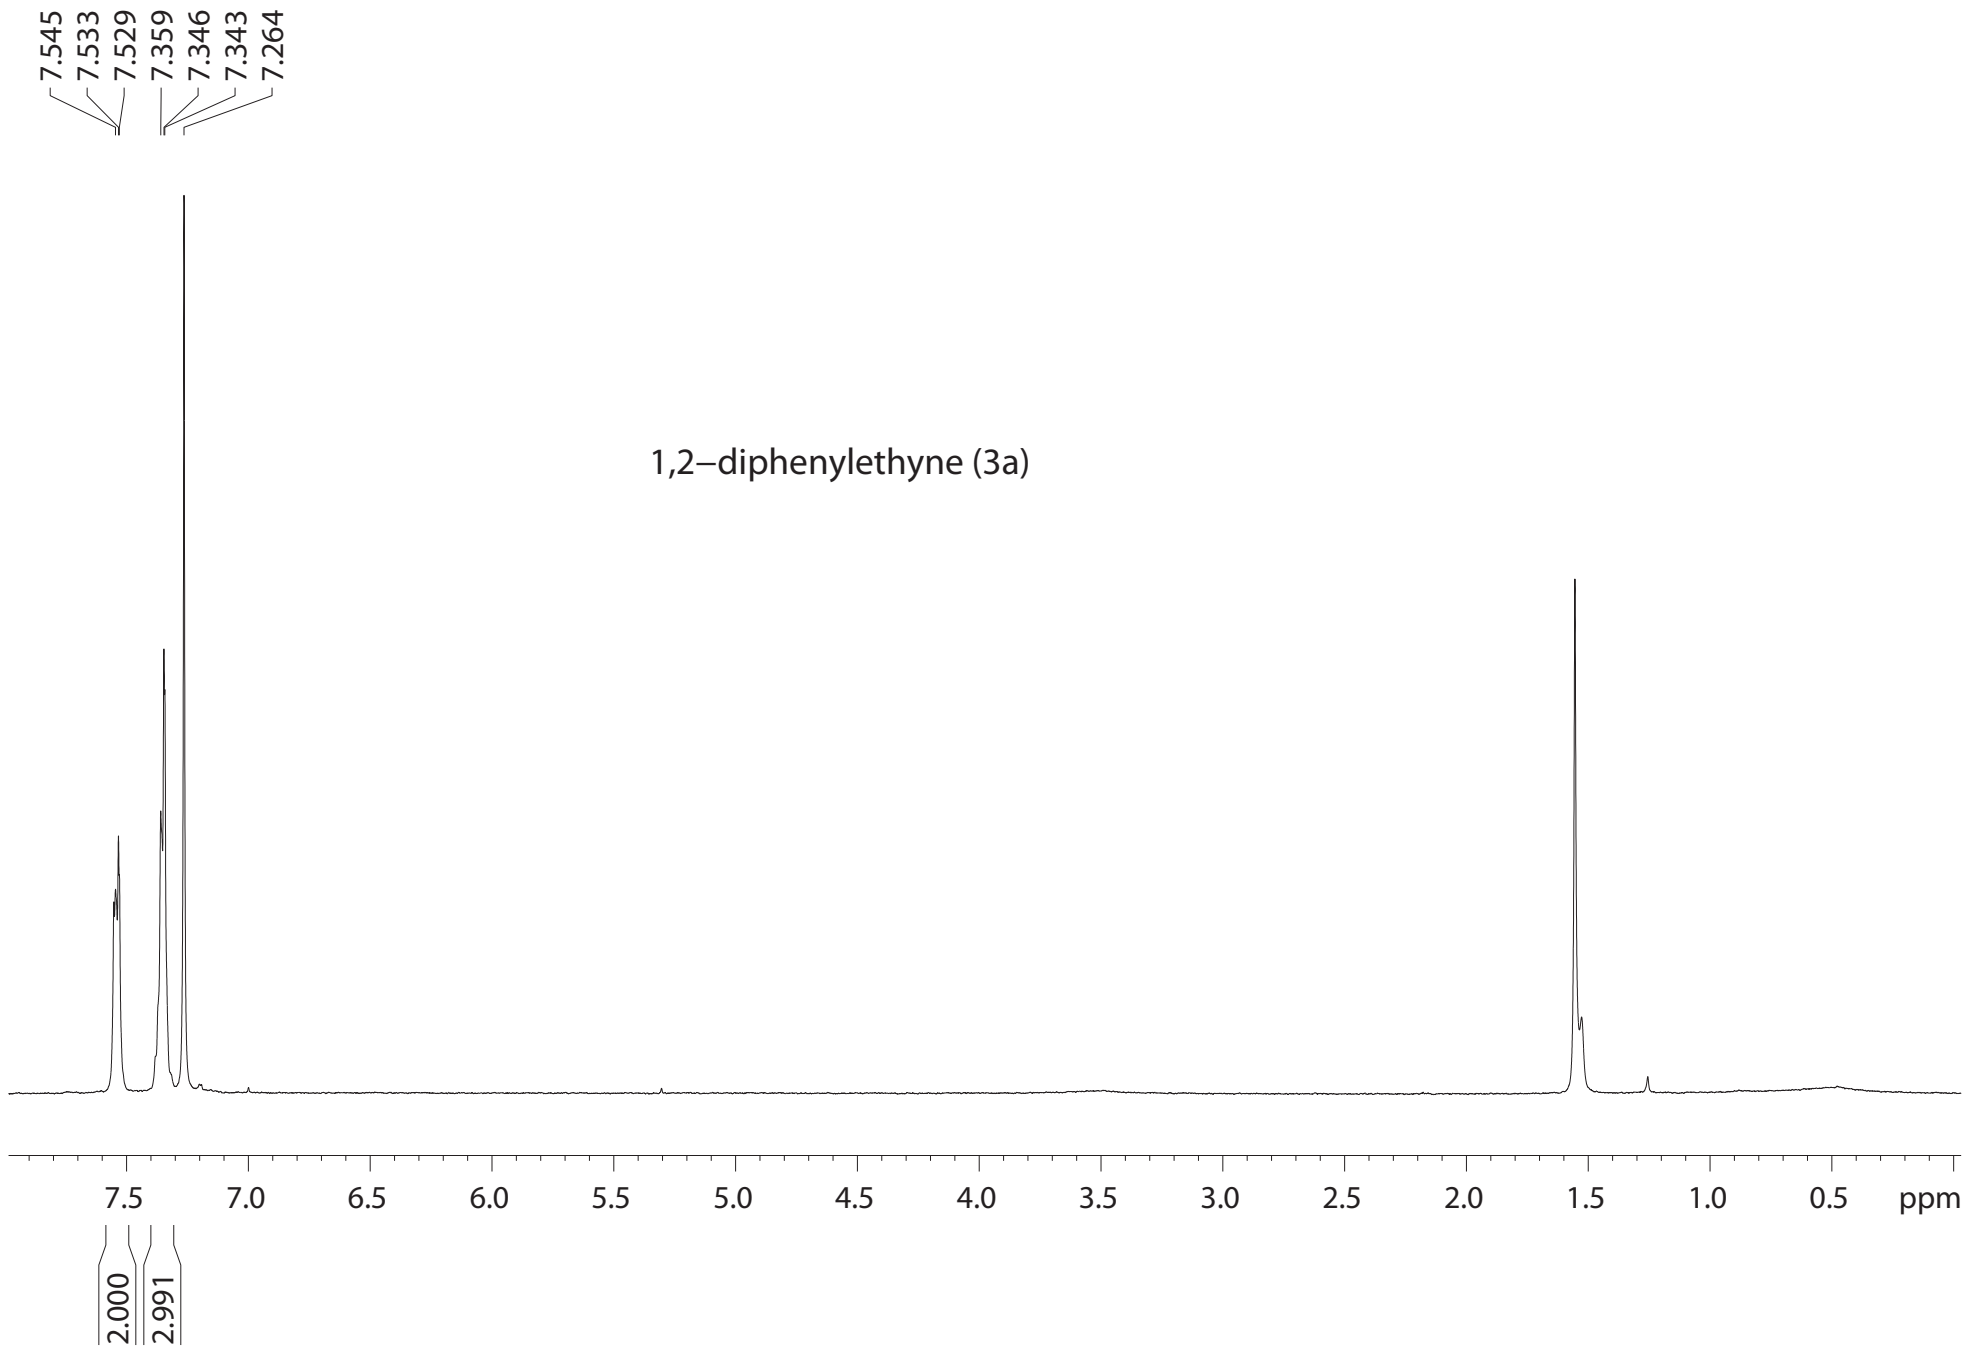

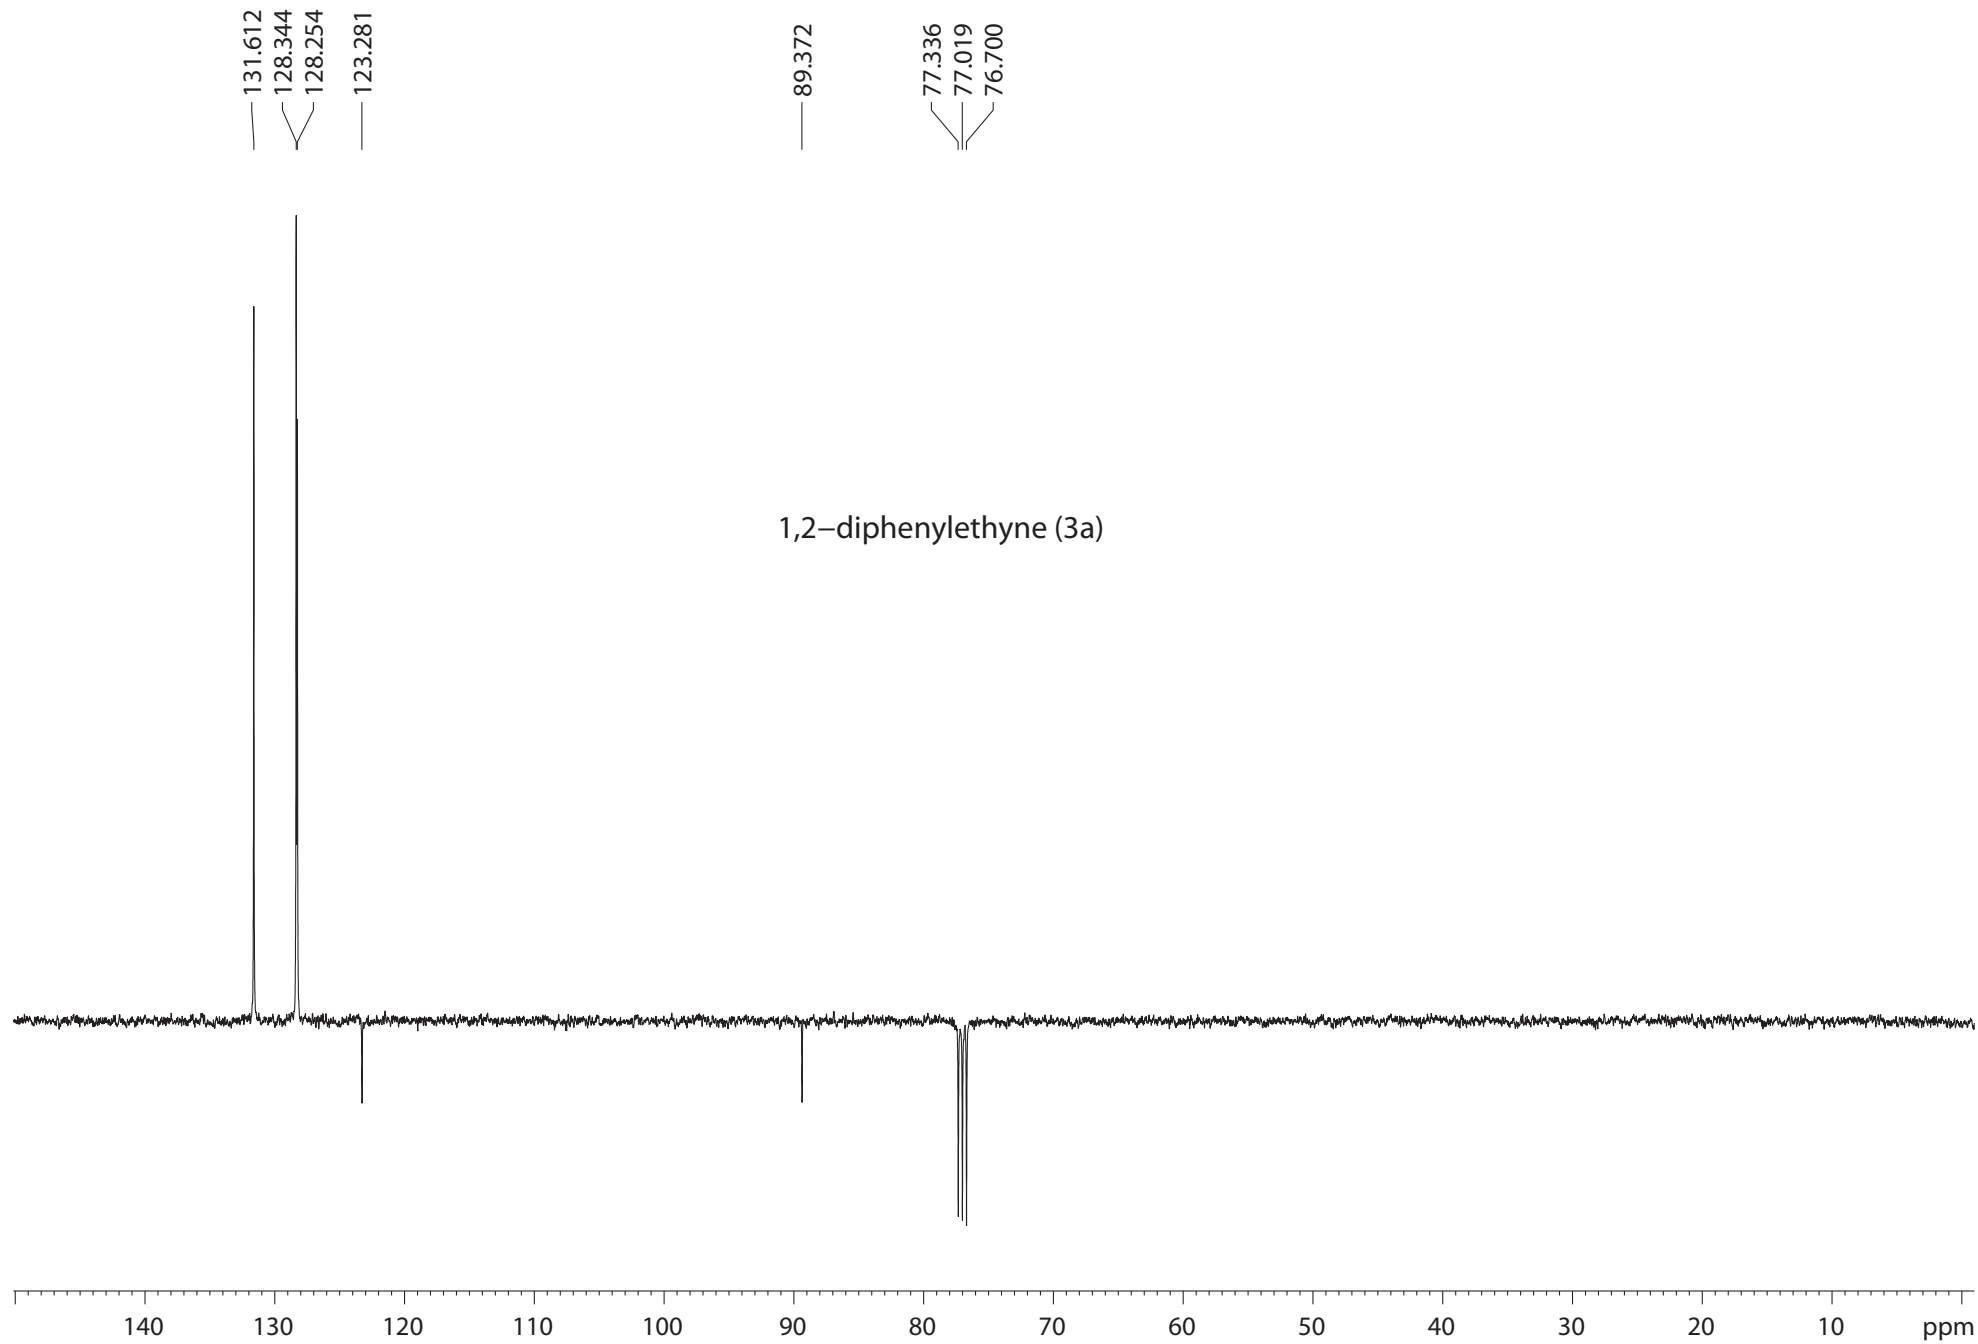



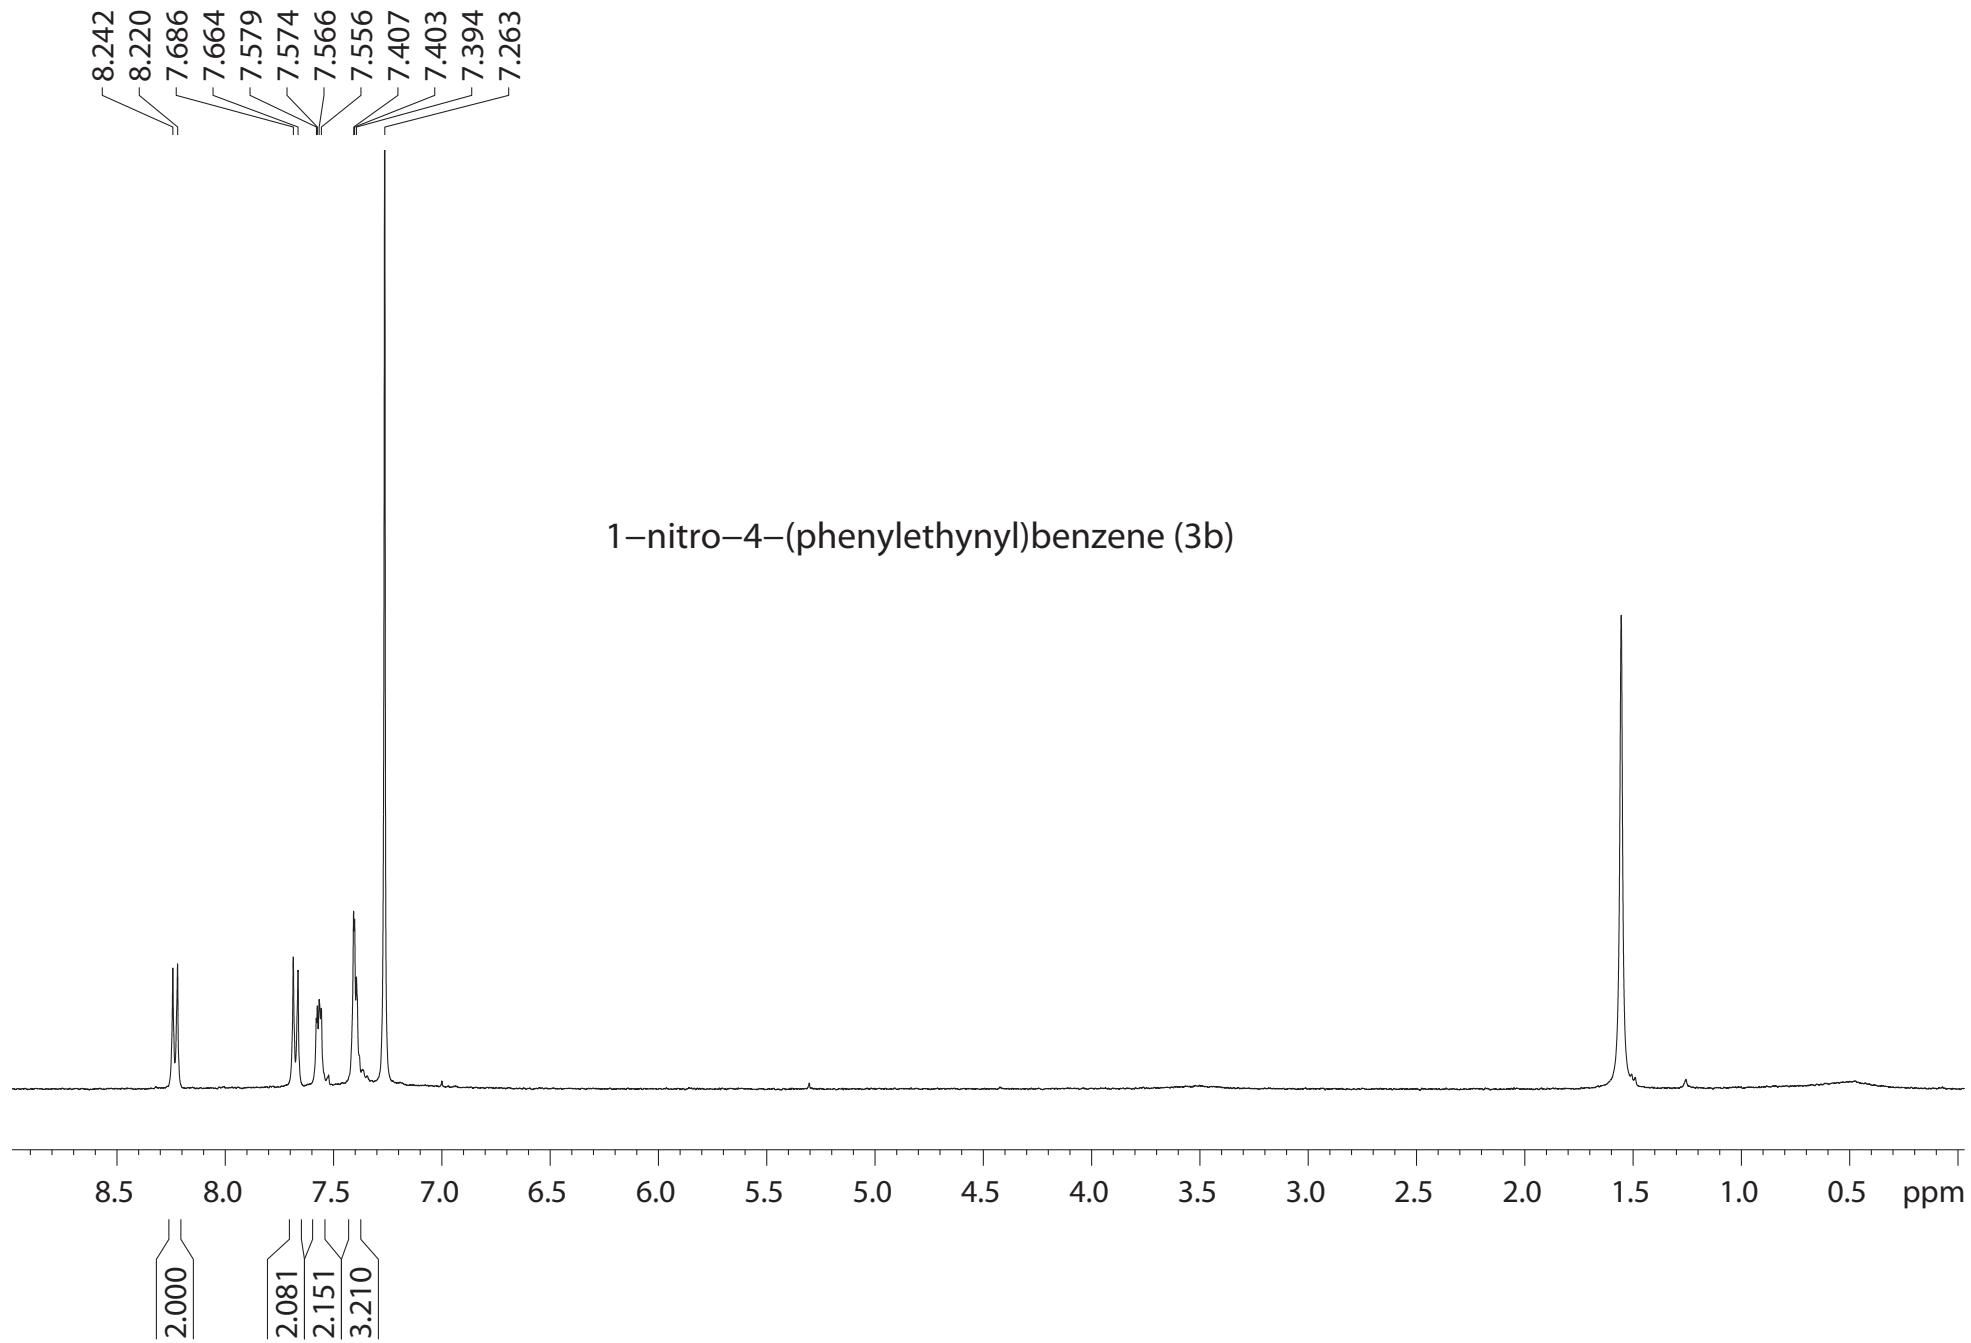

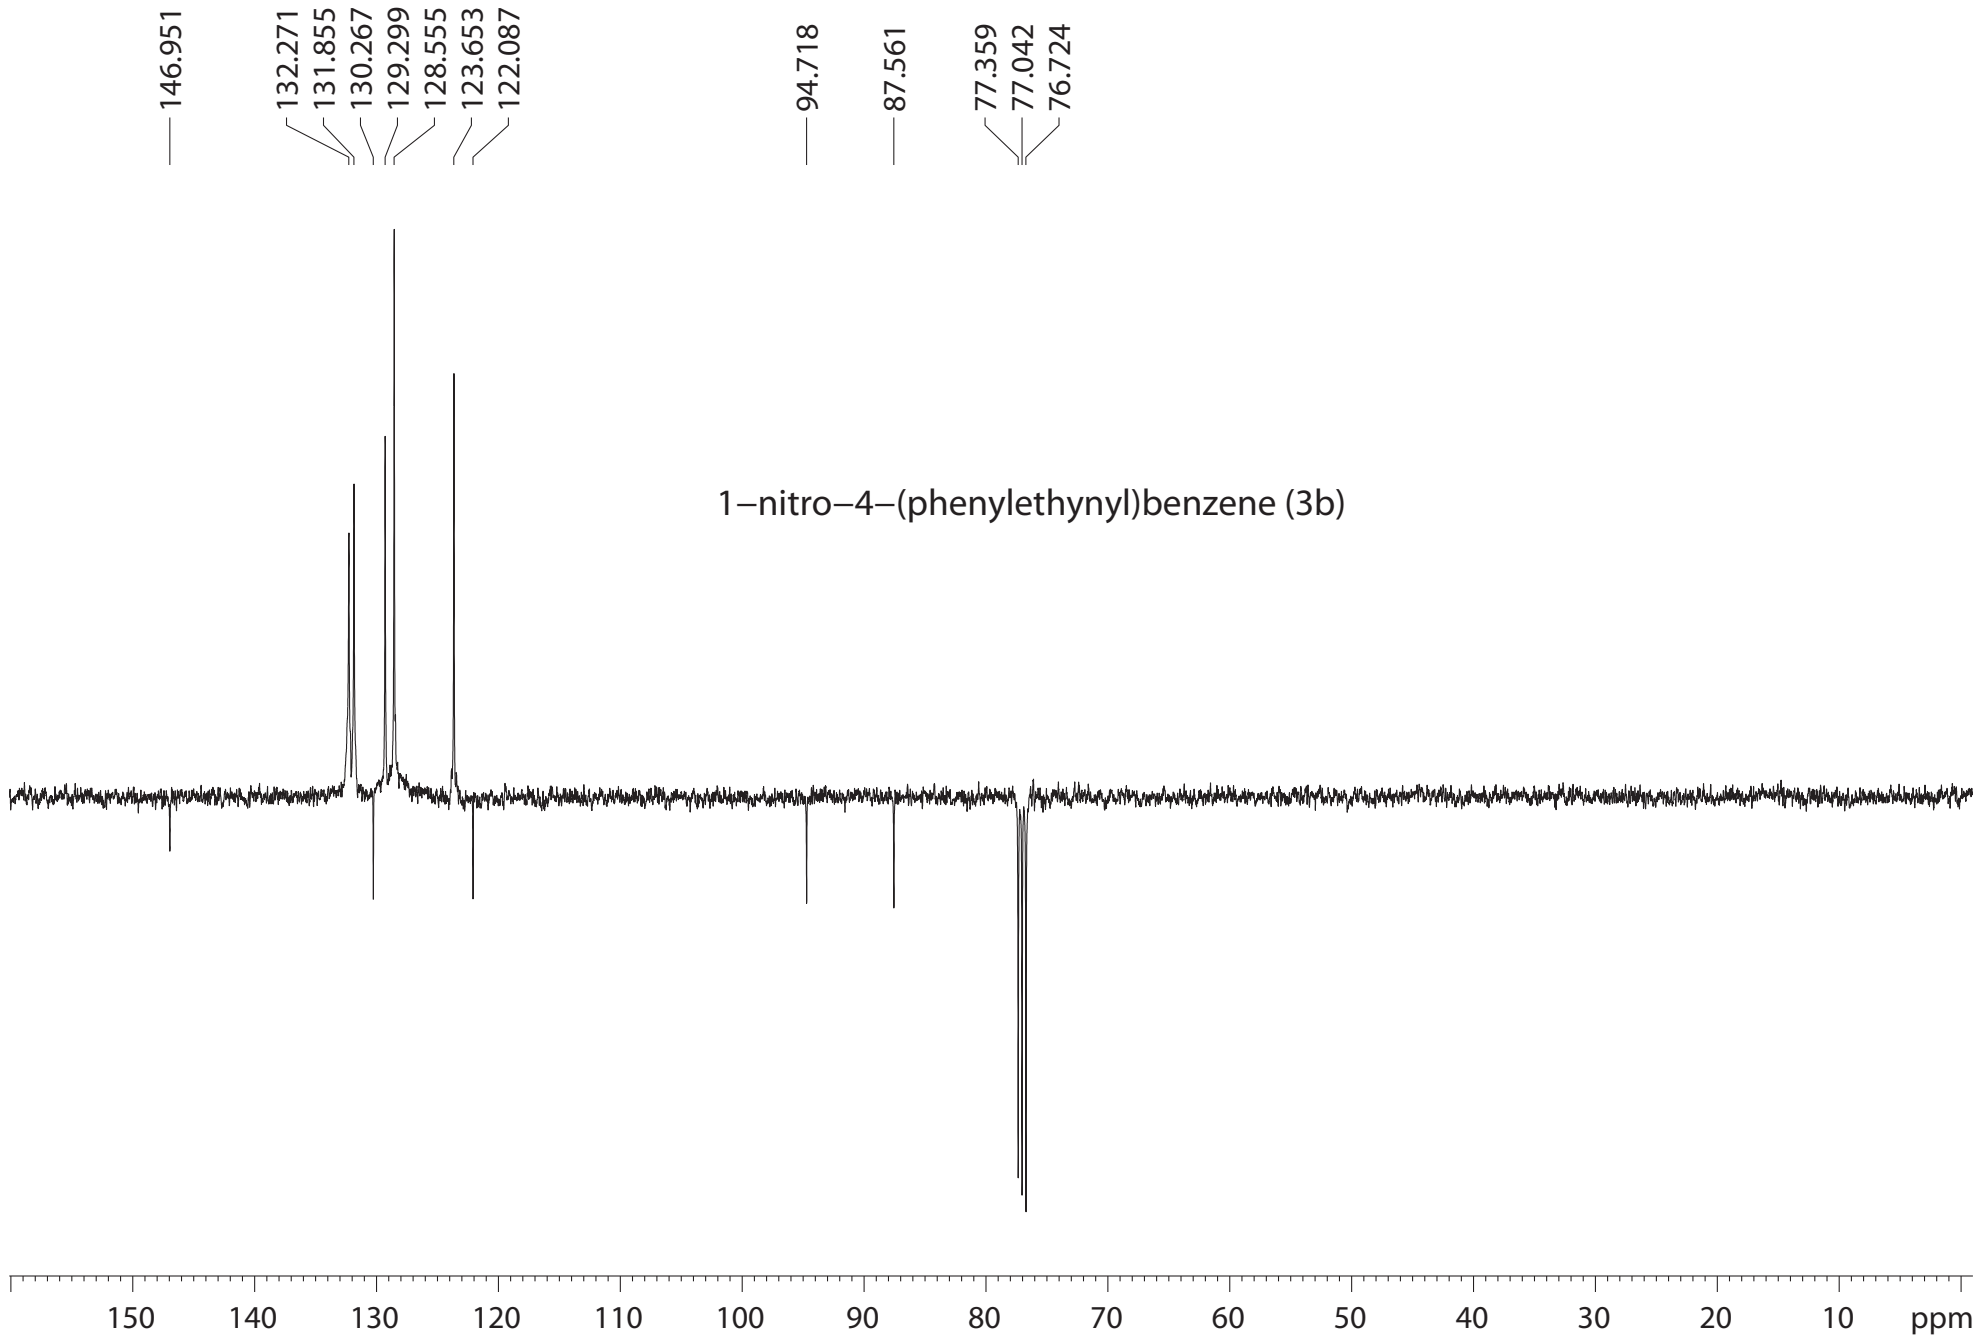

7.960  
7.939  
7.628  
7.607  
7.570  
7.562  
7.557  
7.553  
7.547  
7.523  
7.385  
7.377  
7.369  
7.264

1-(4-(phenylethynyl)phenyl)ethanone (3c)

2.624

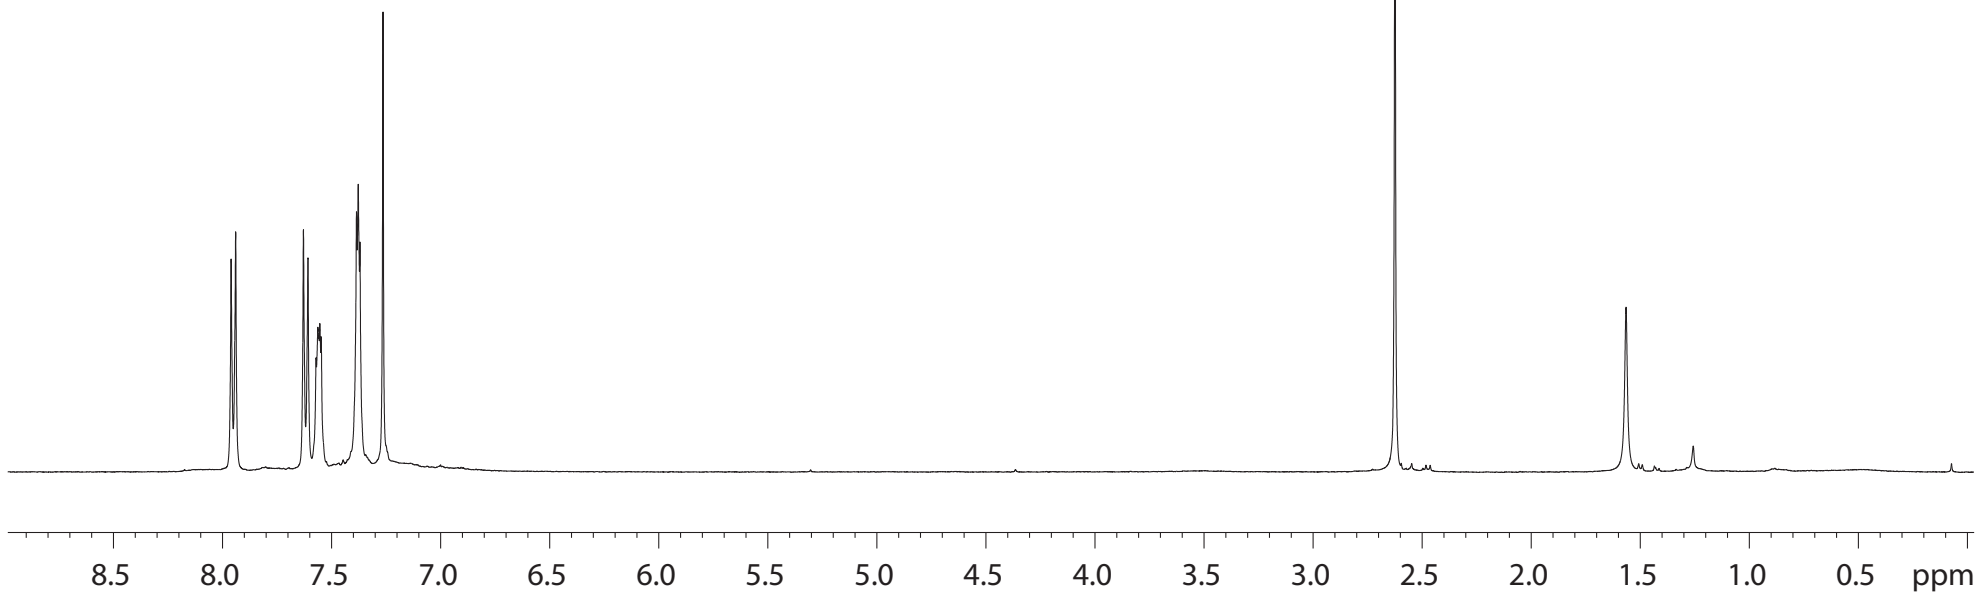

2.000  
2.040  
2.144  
3.306

2.879

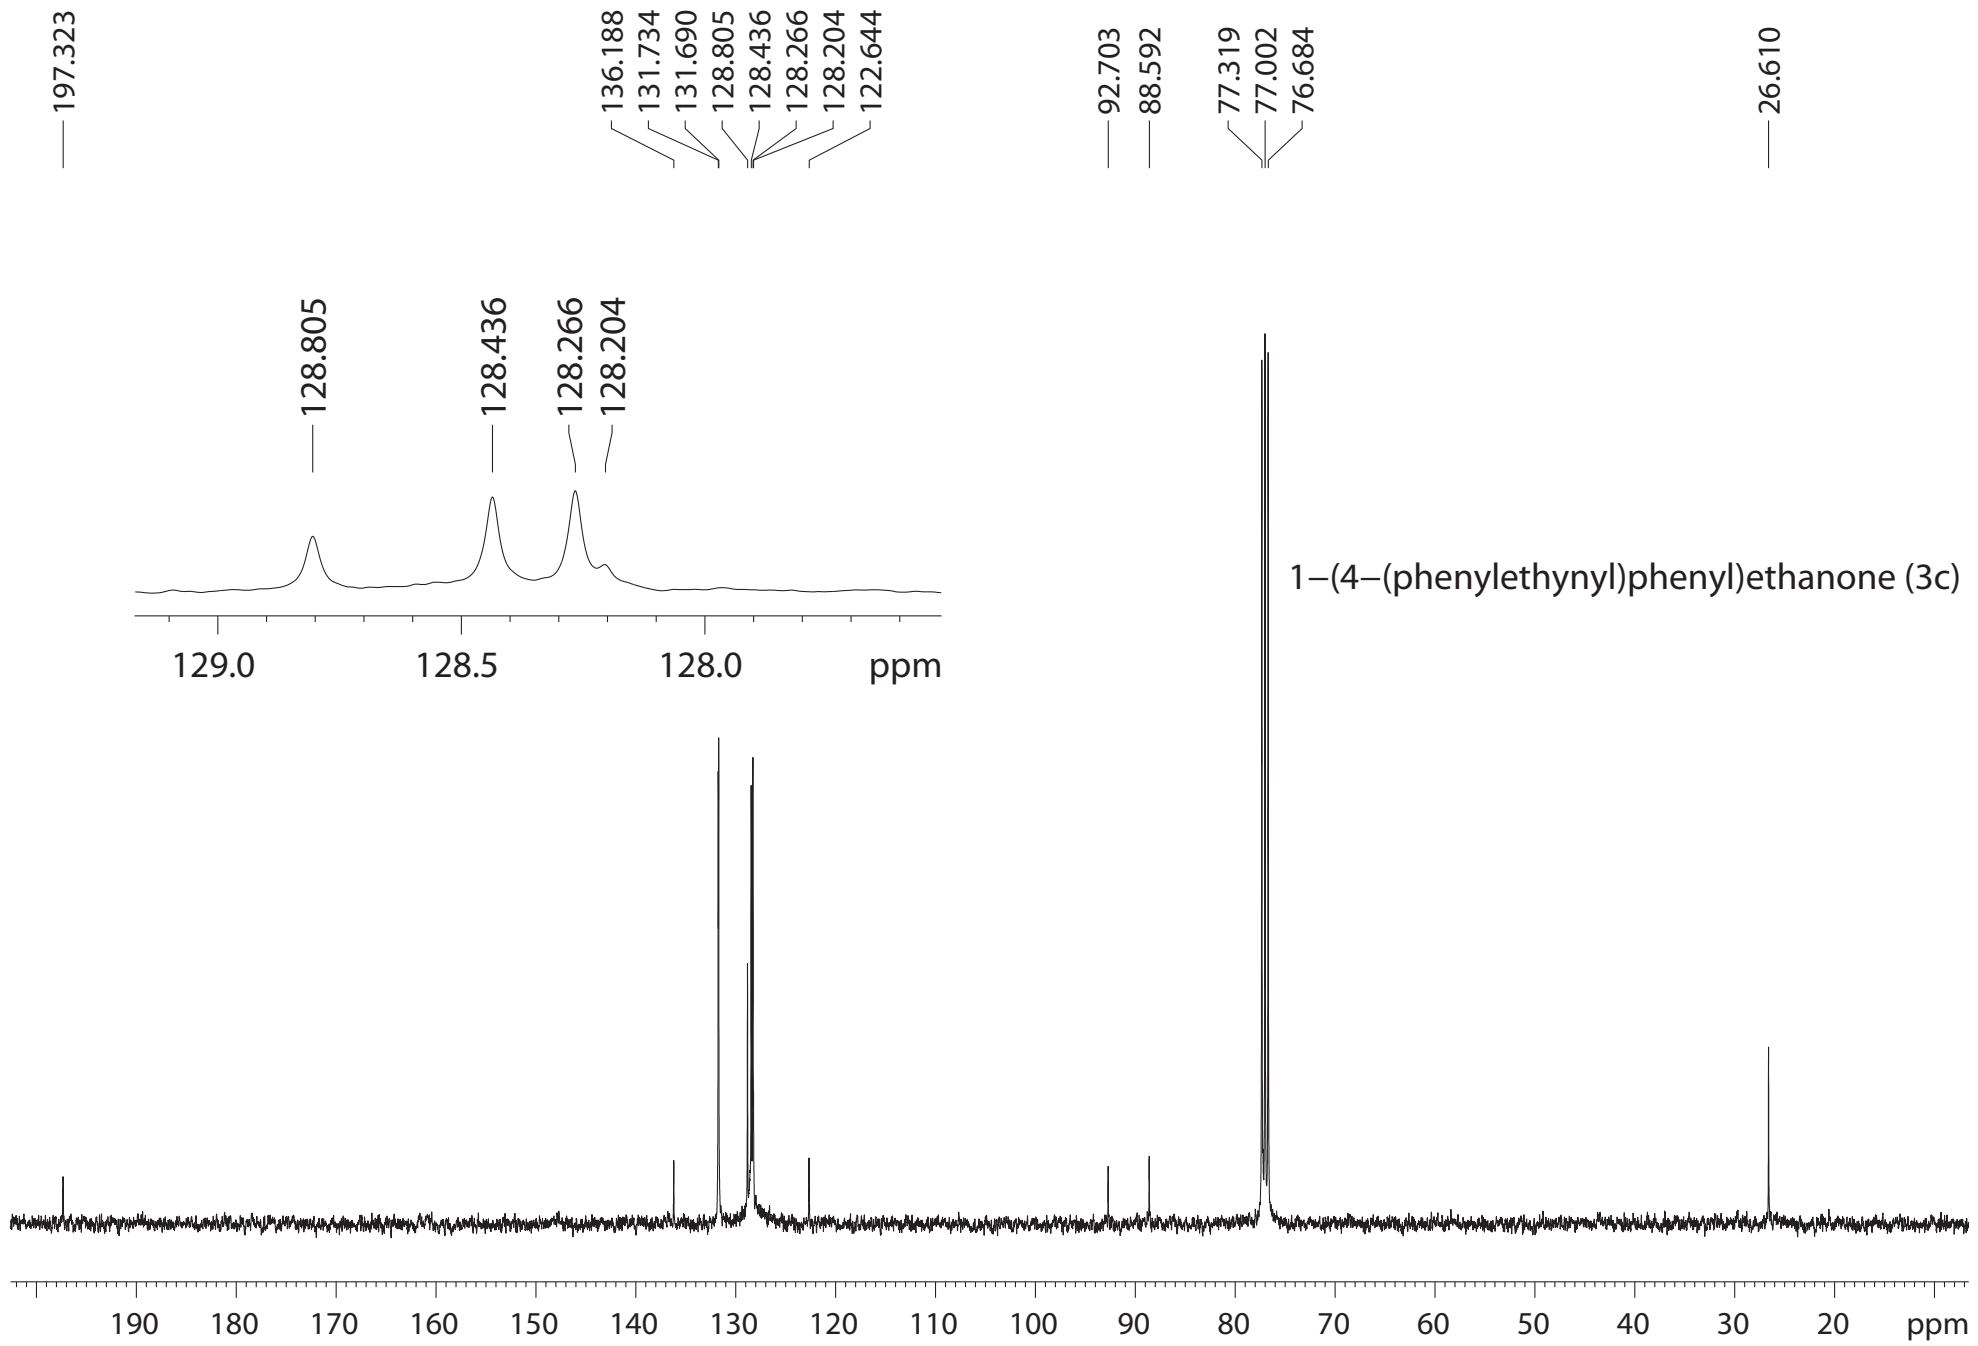

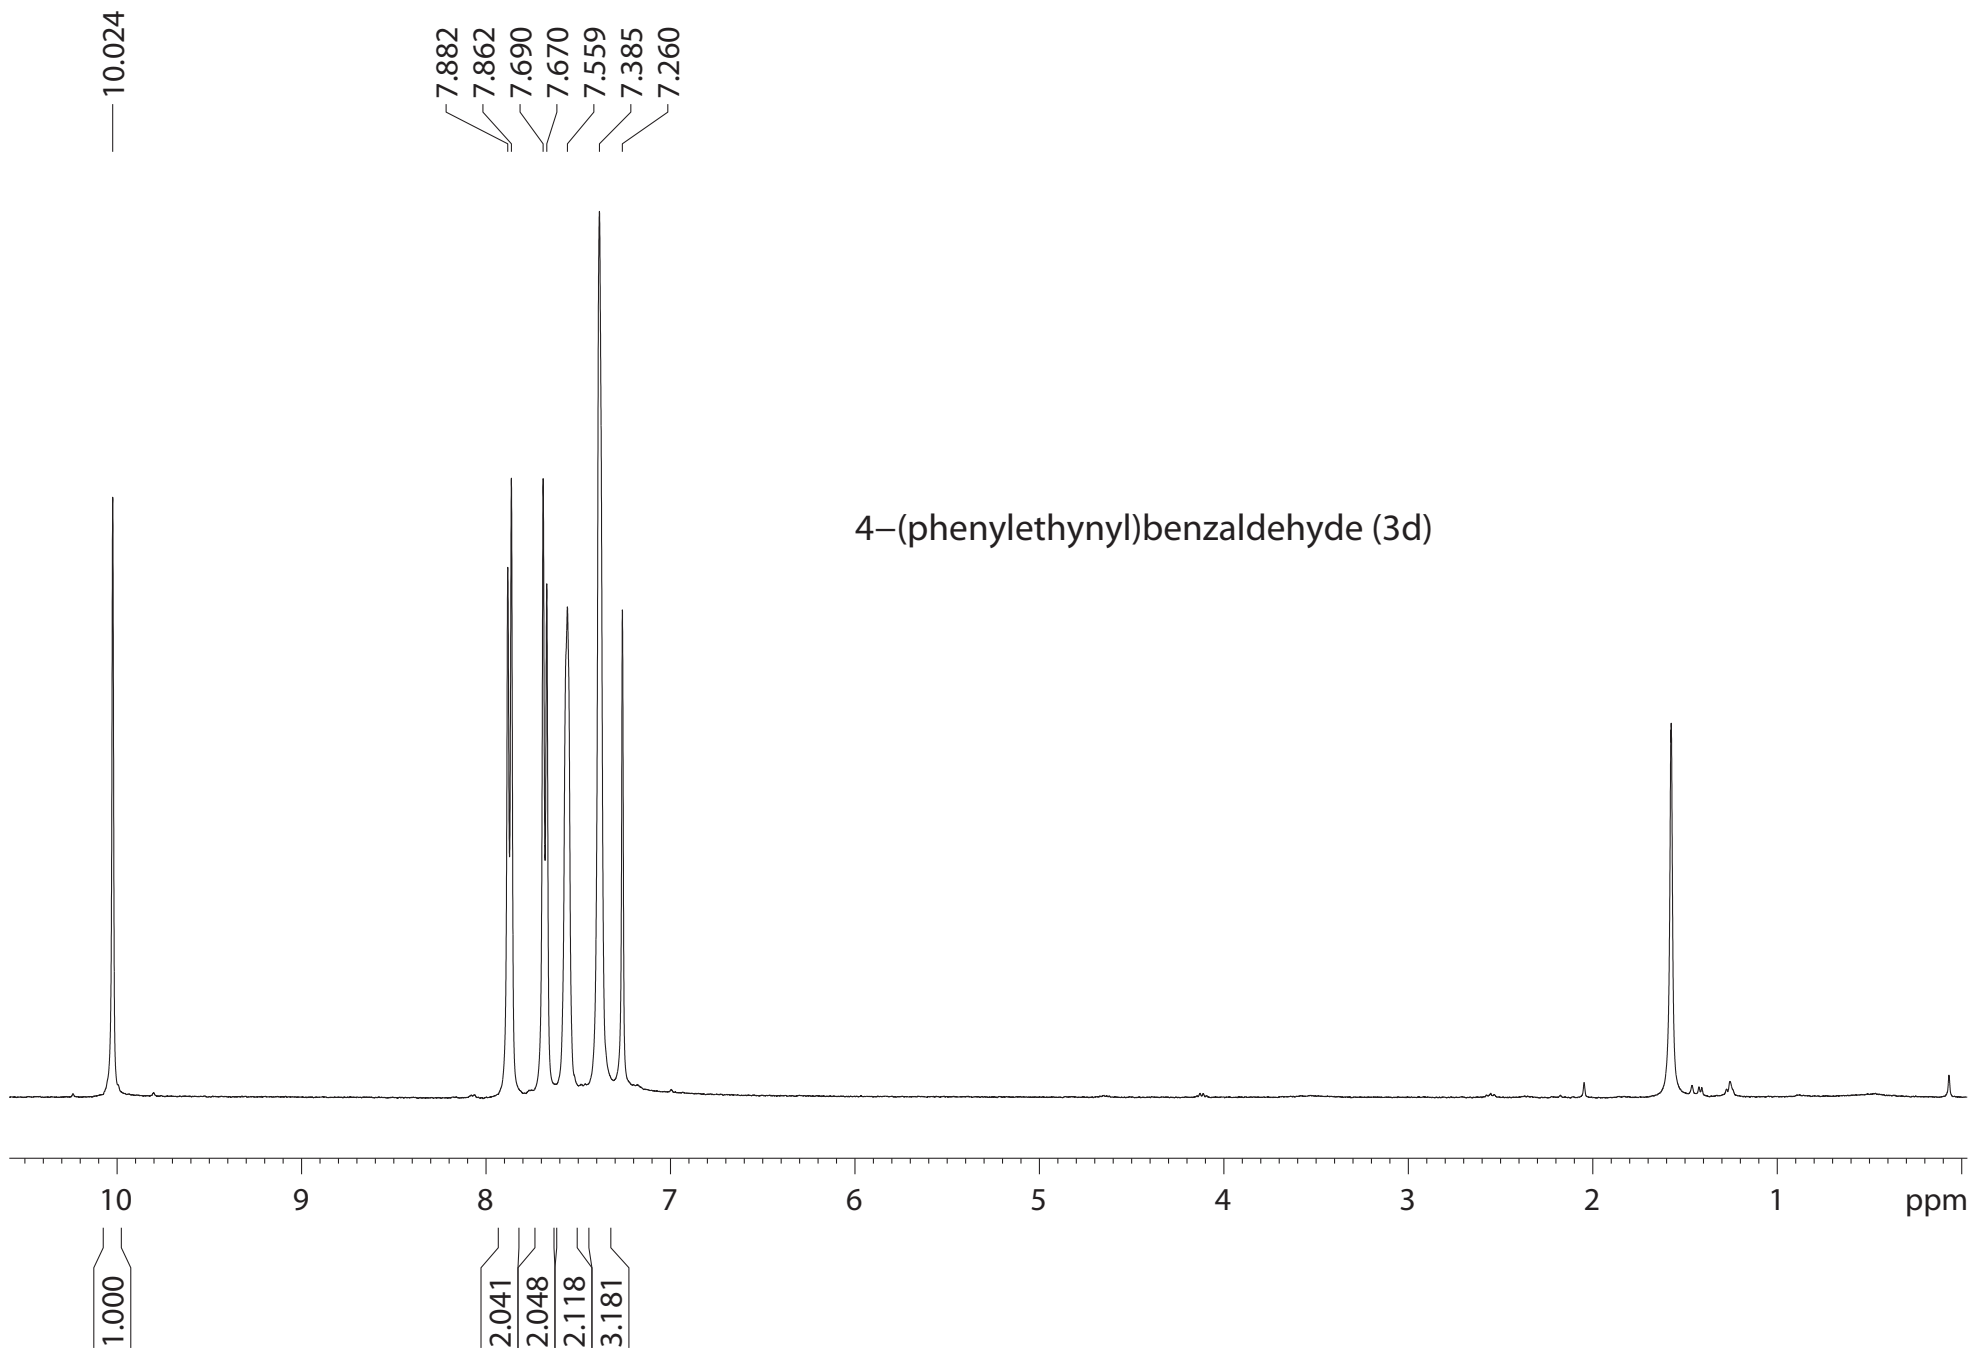

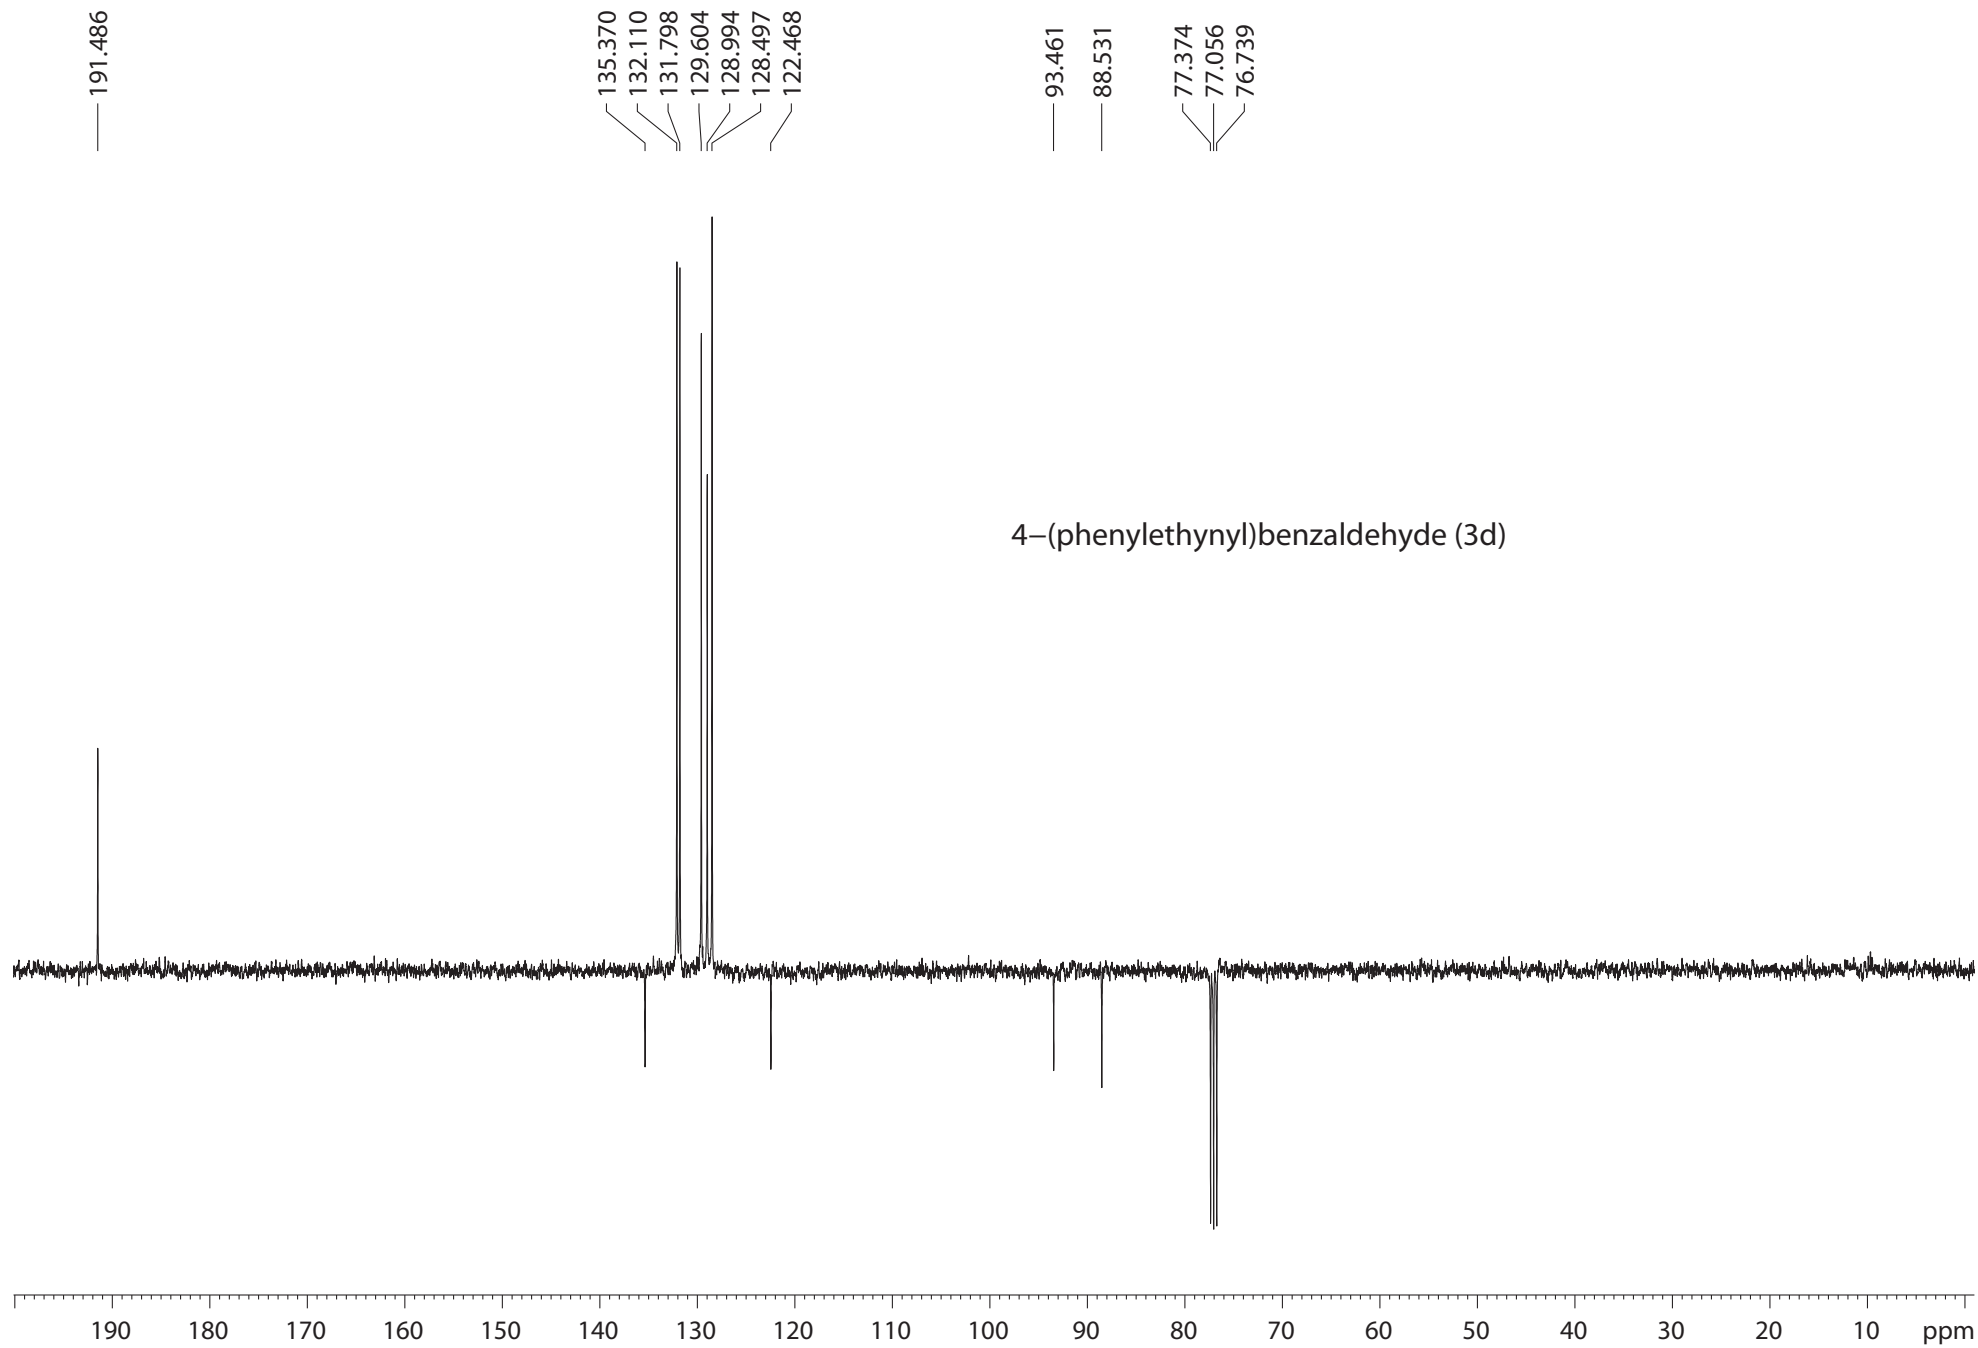

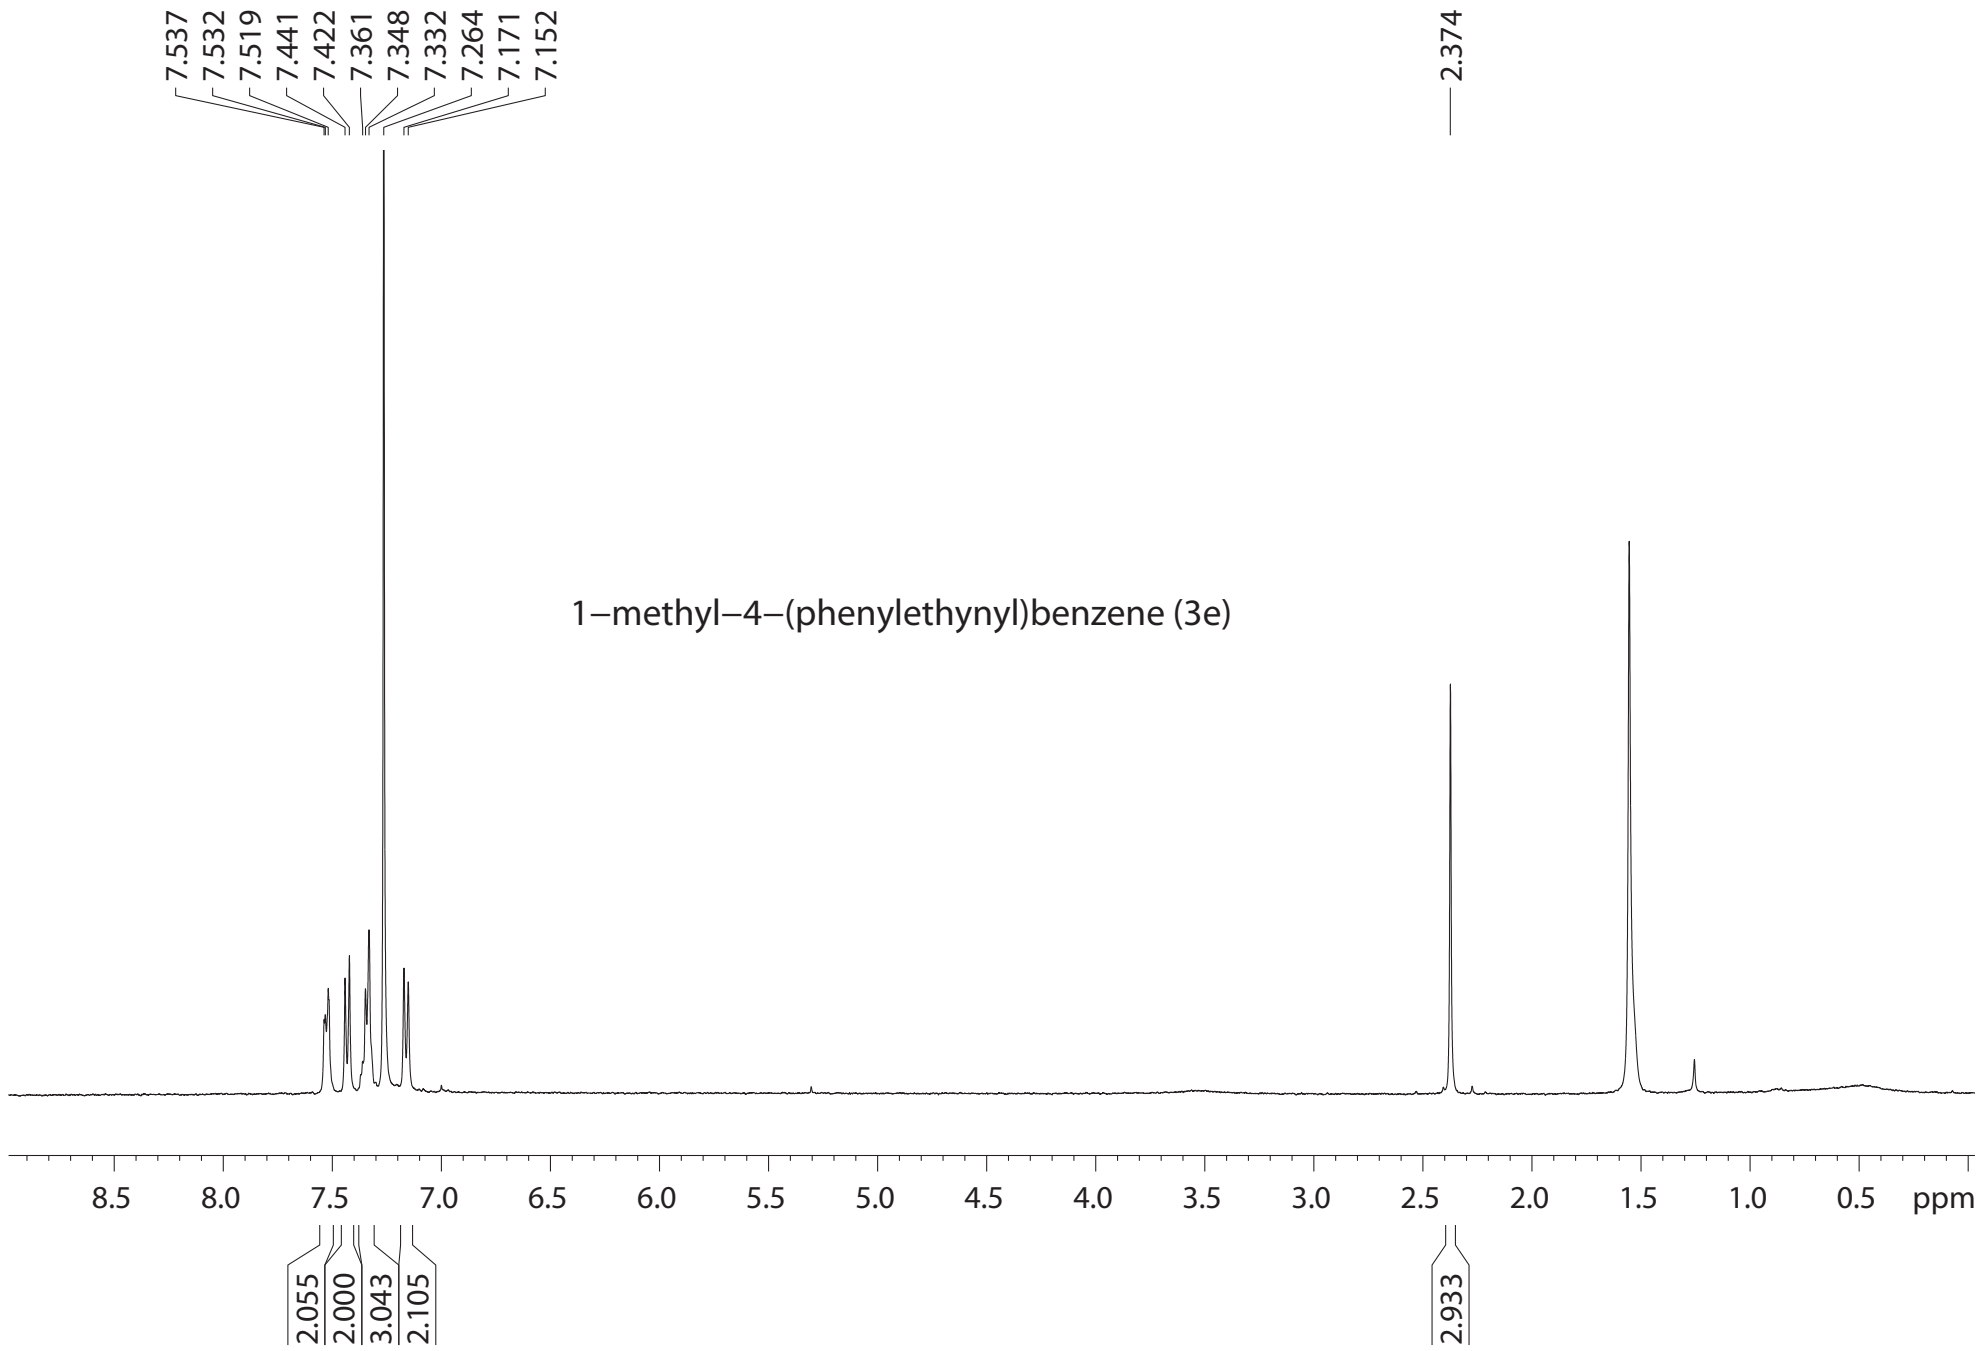

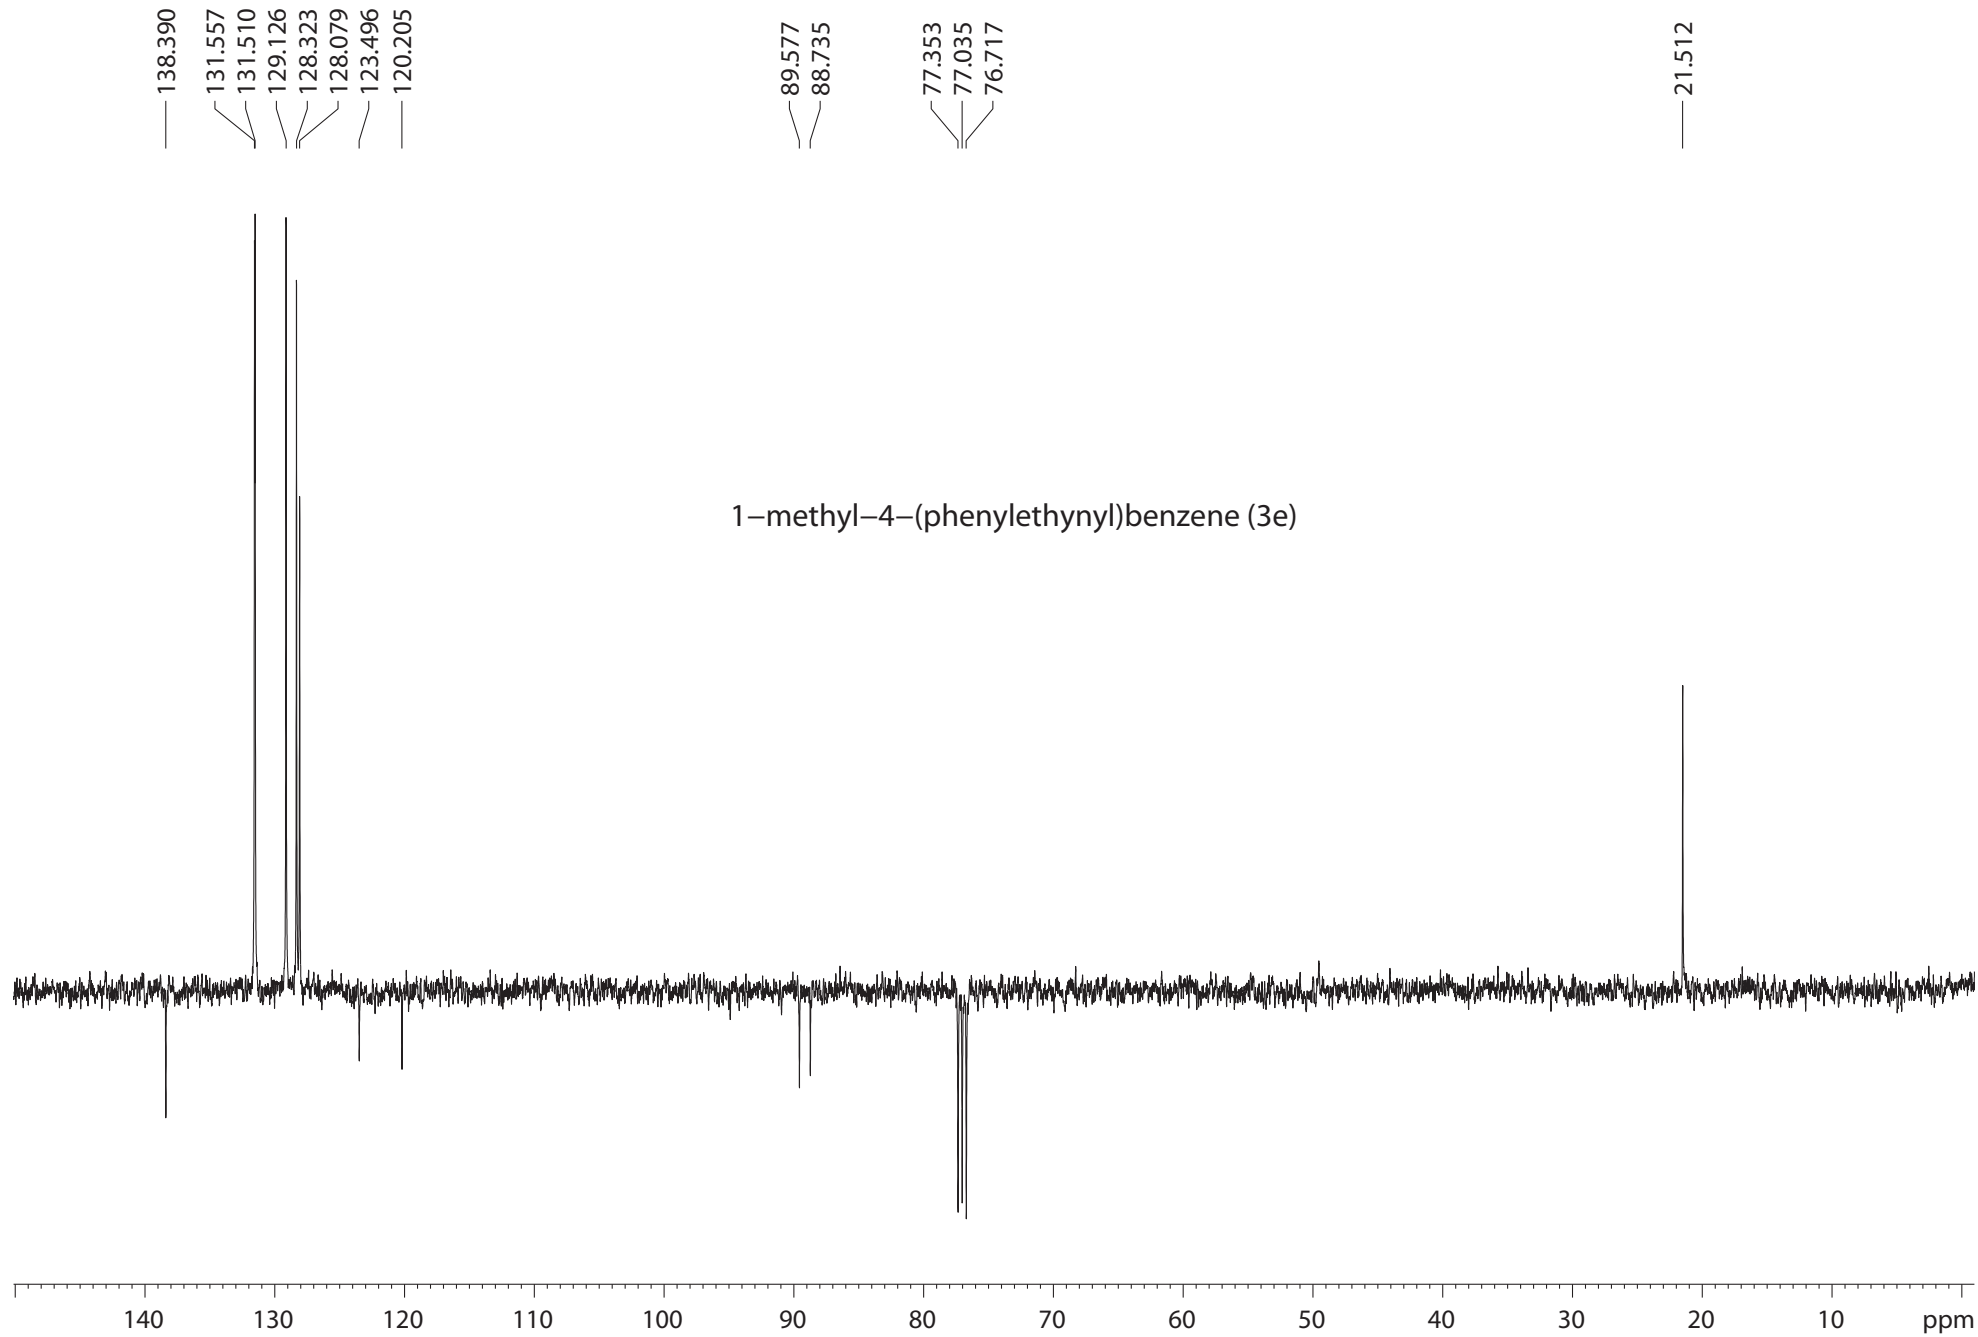



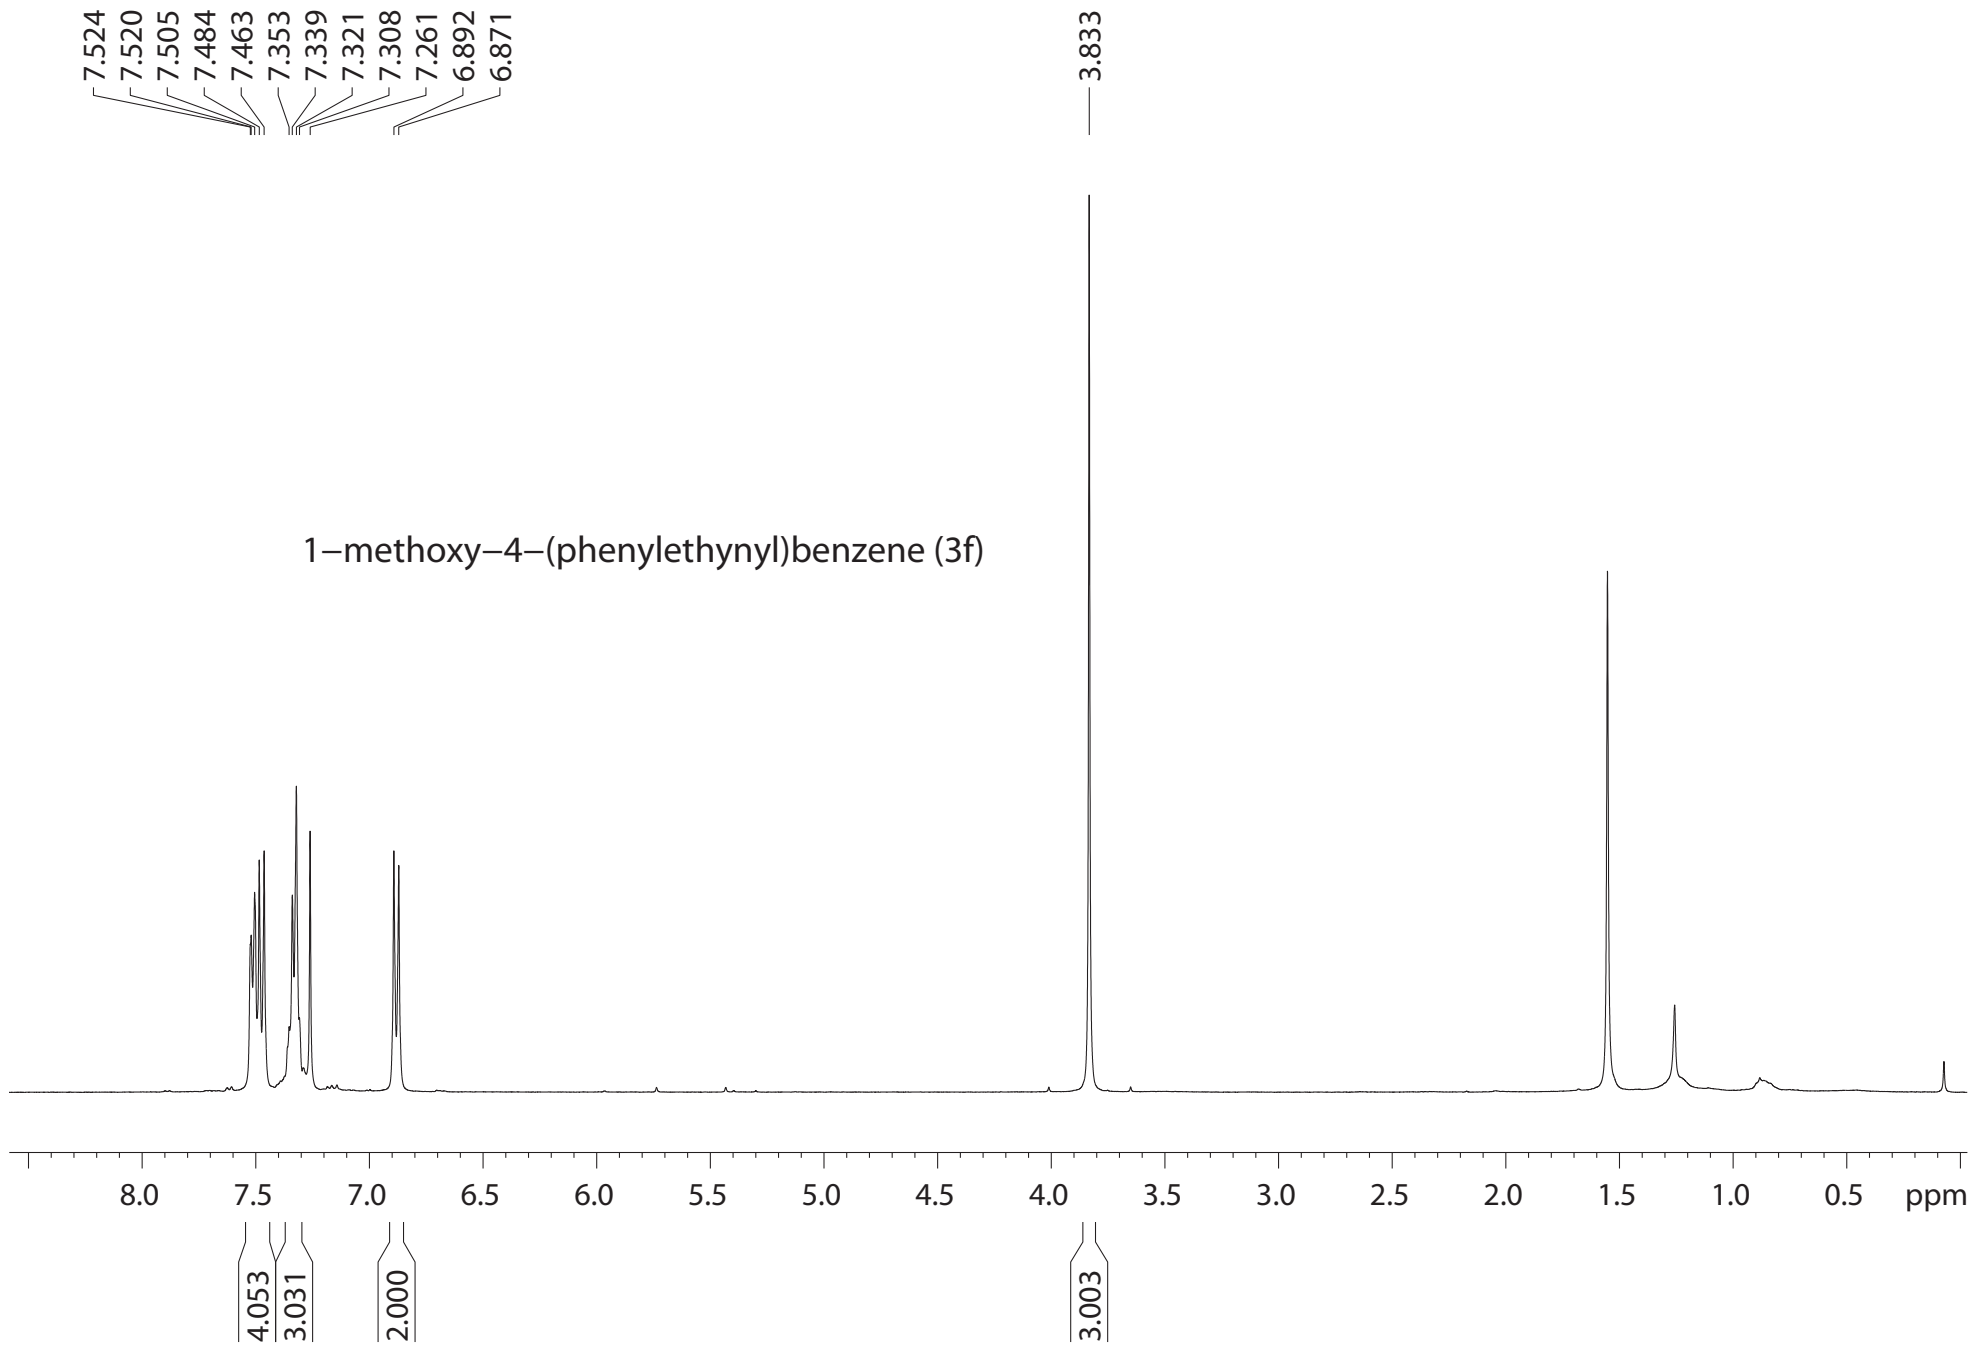

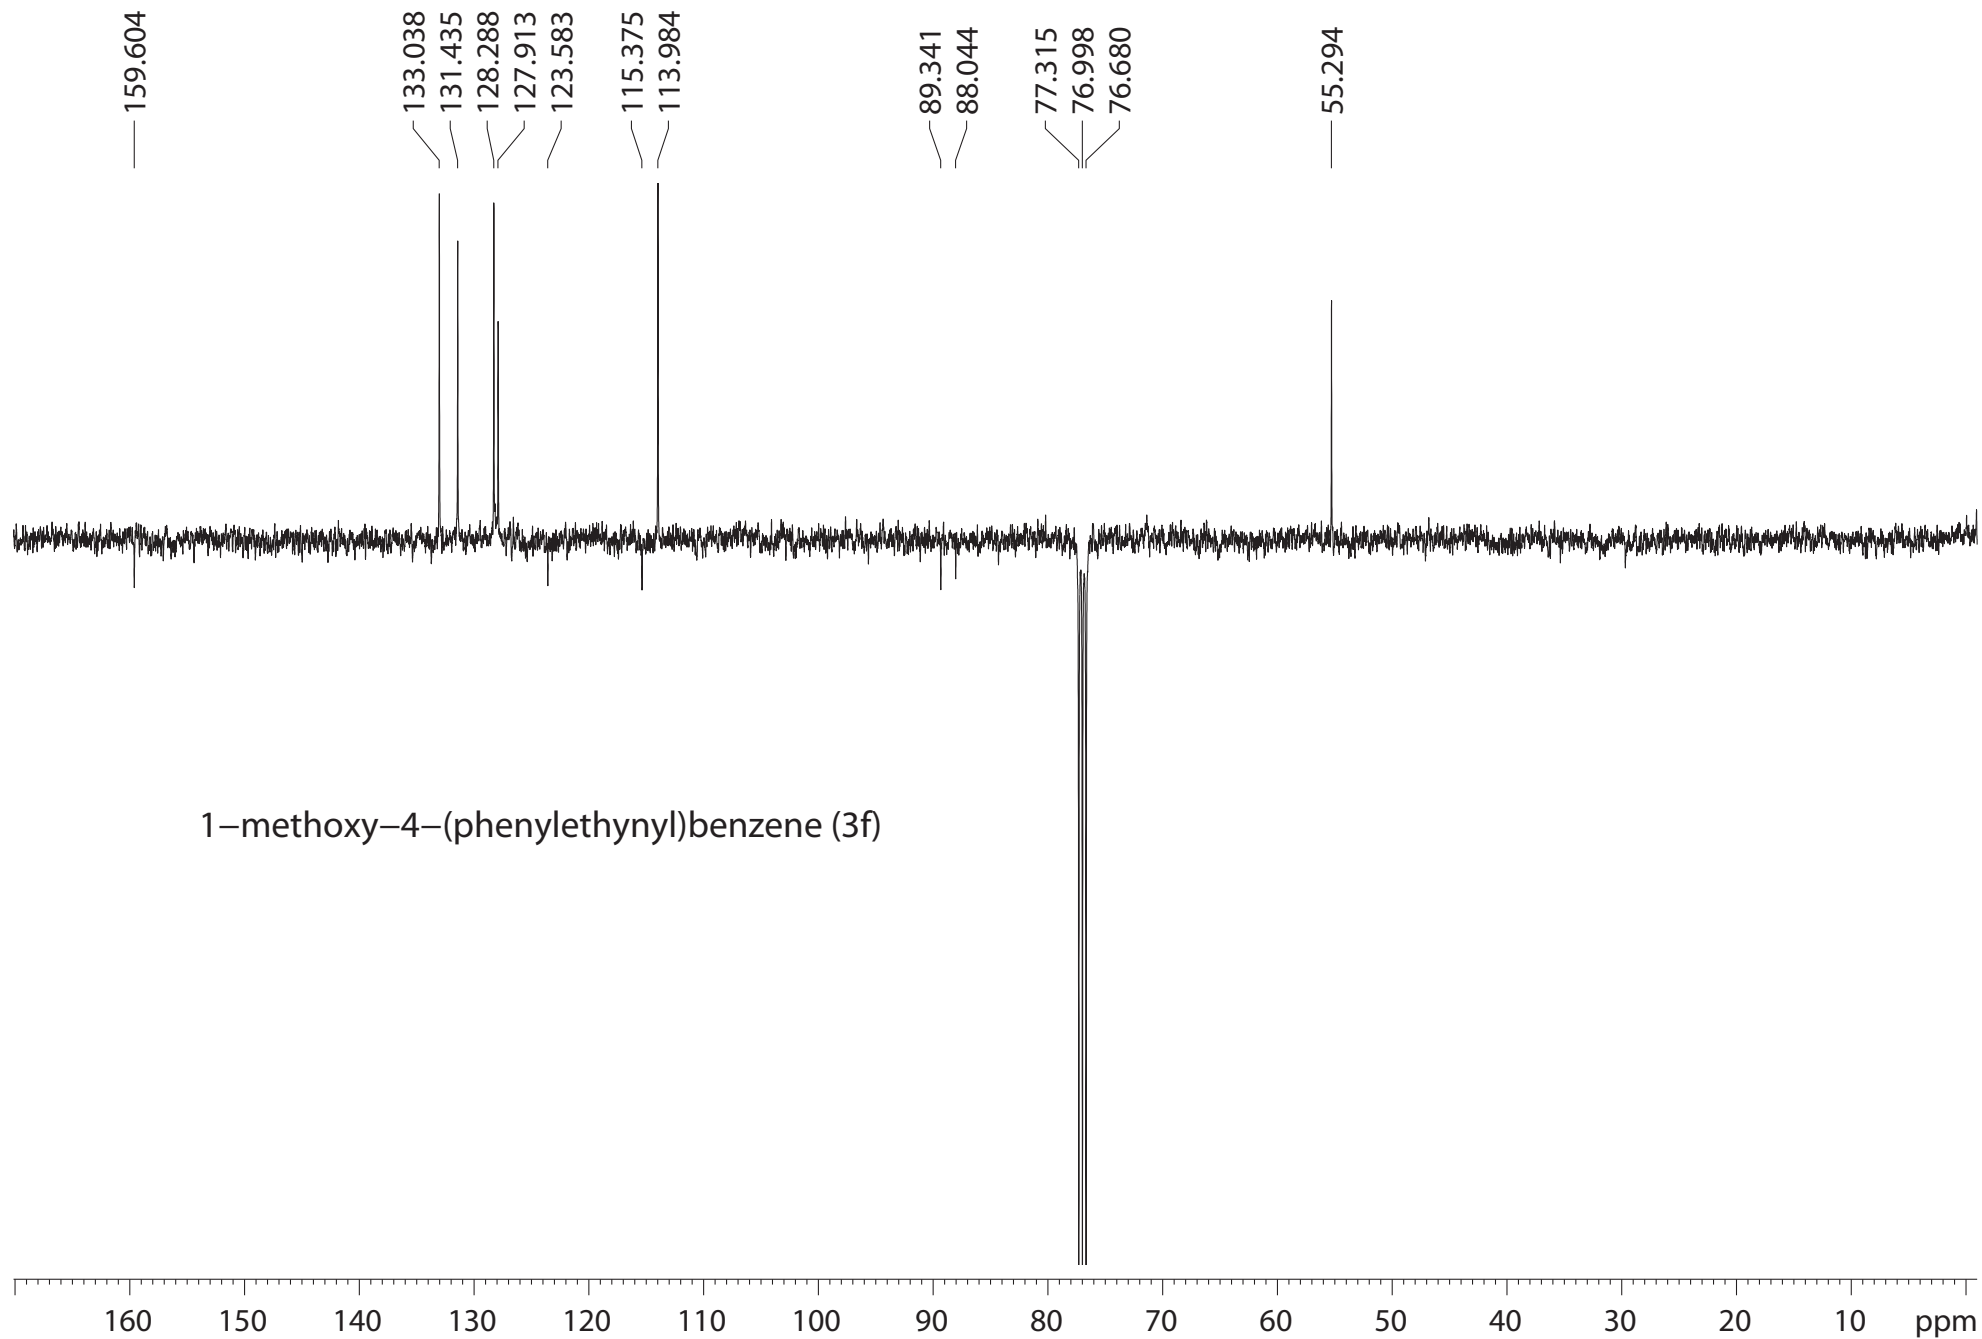

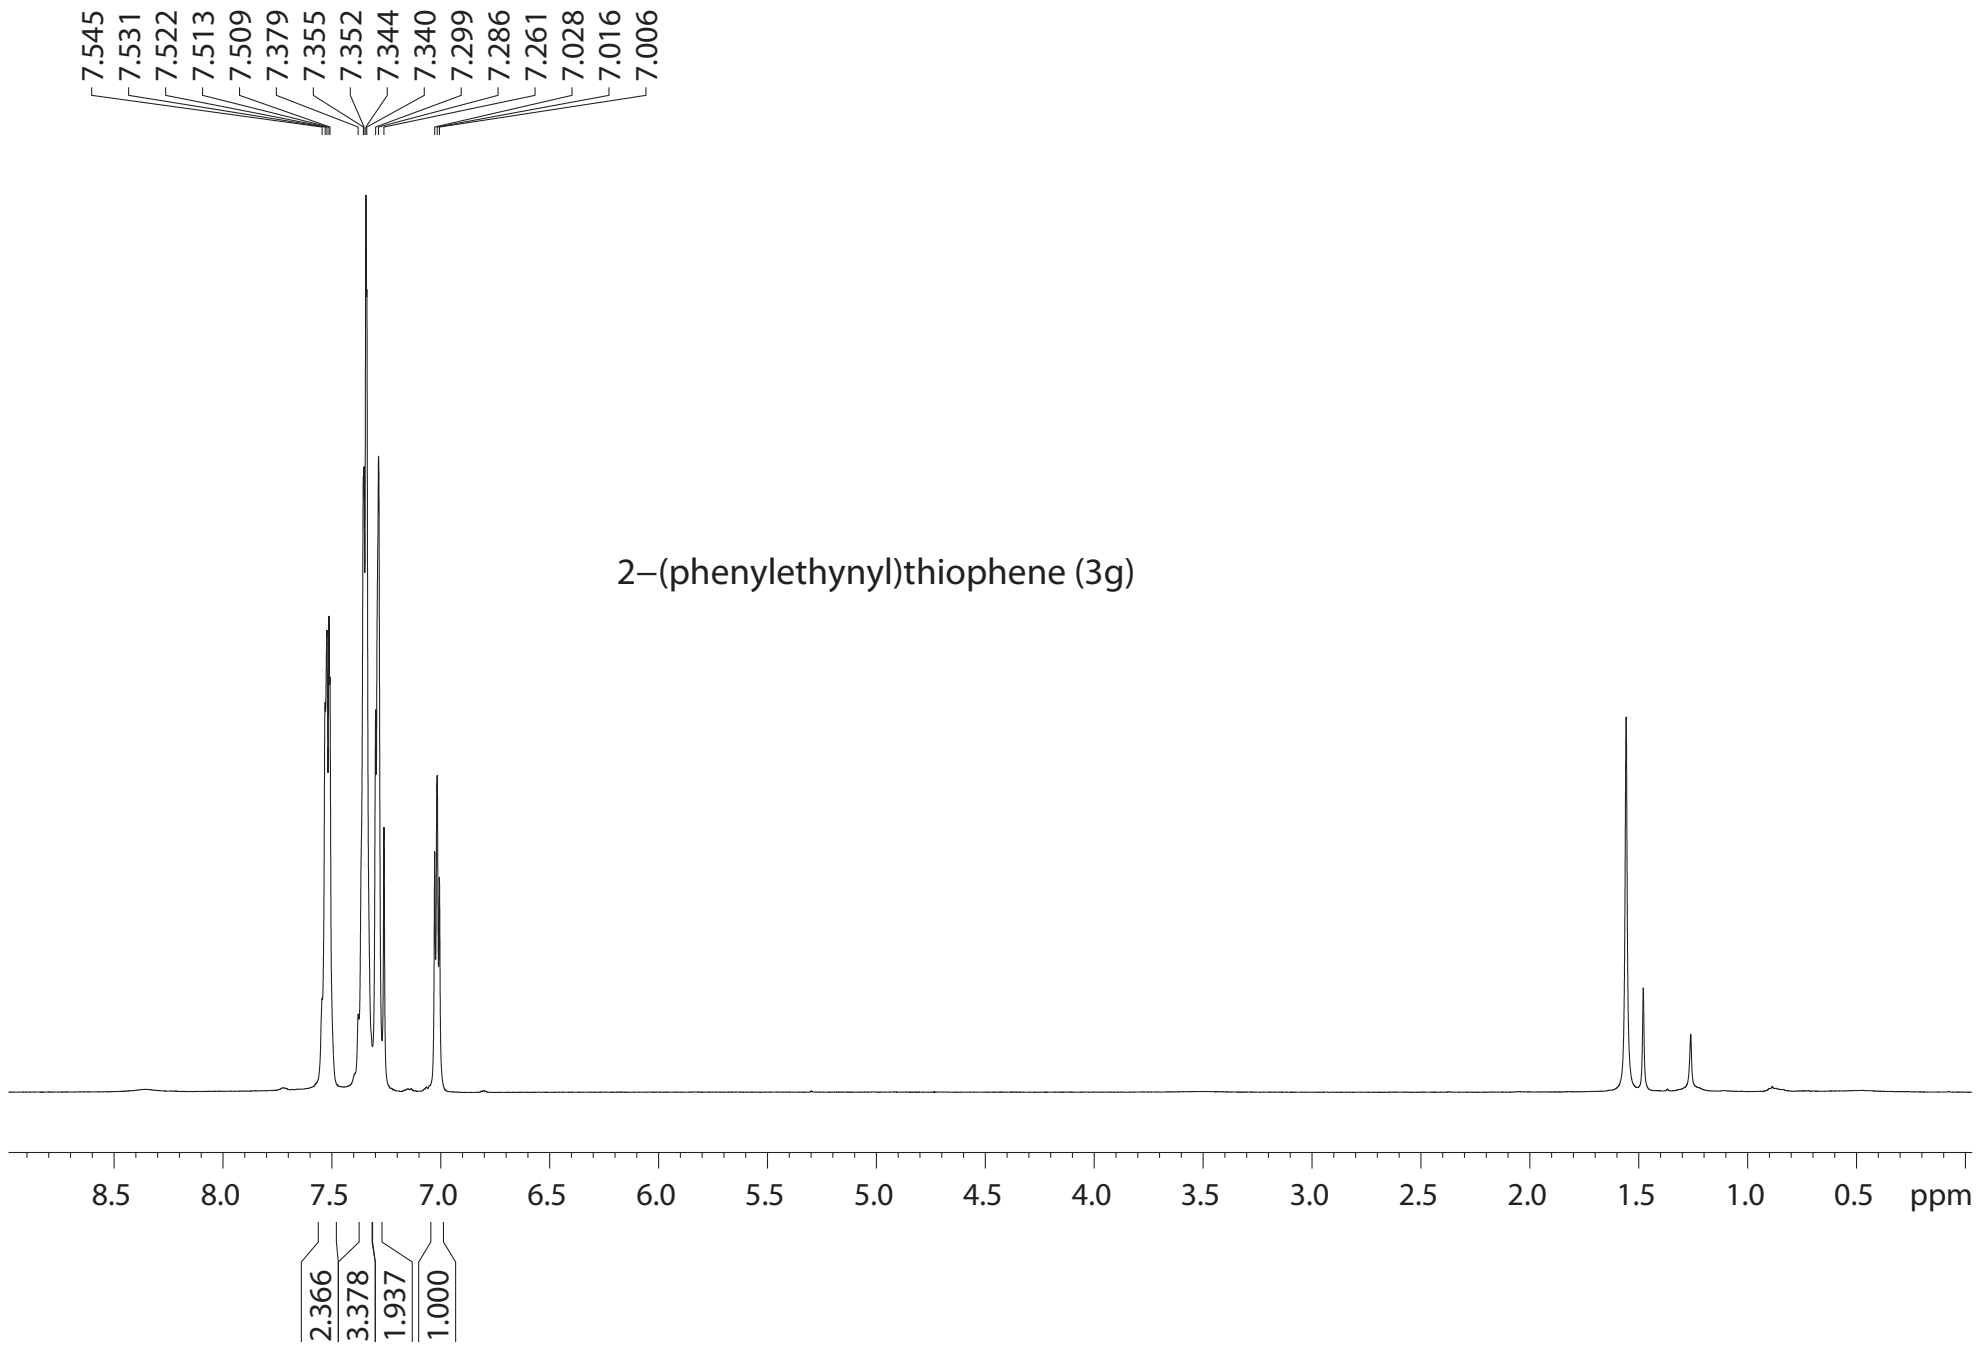

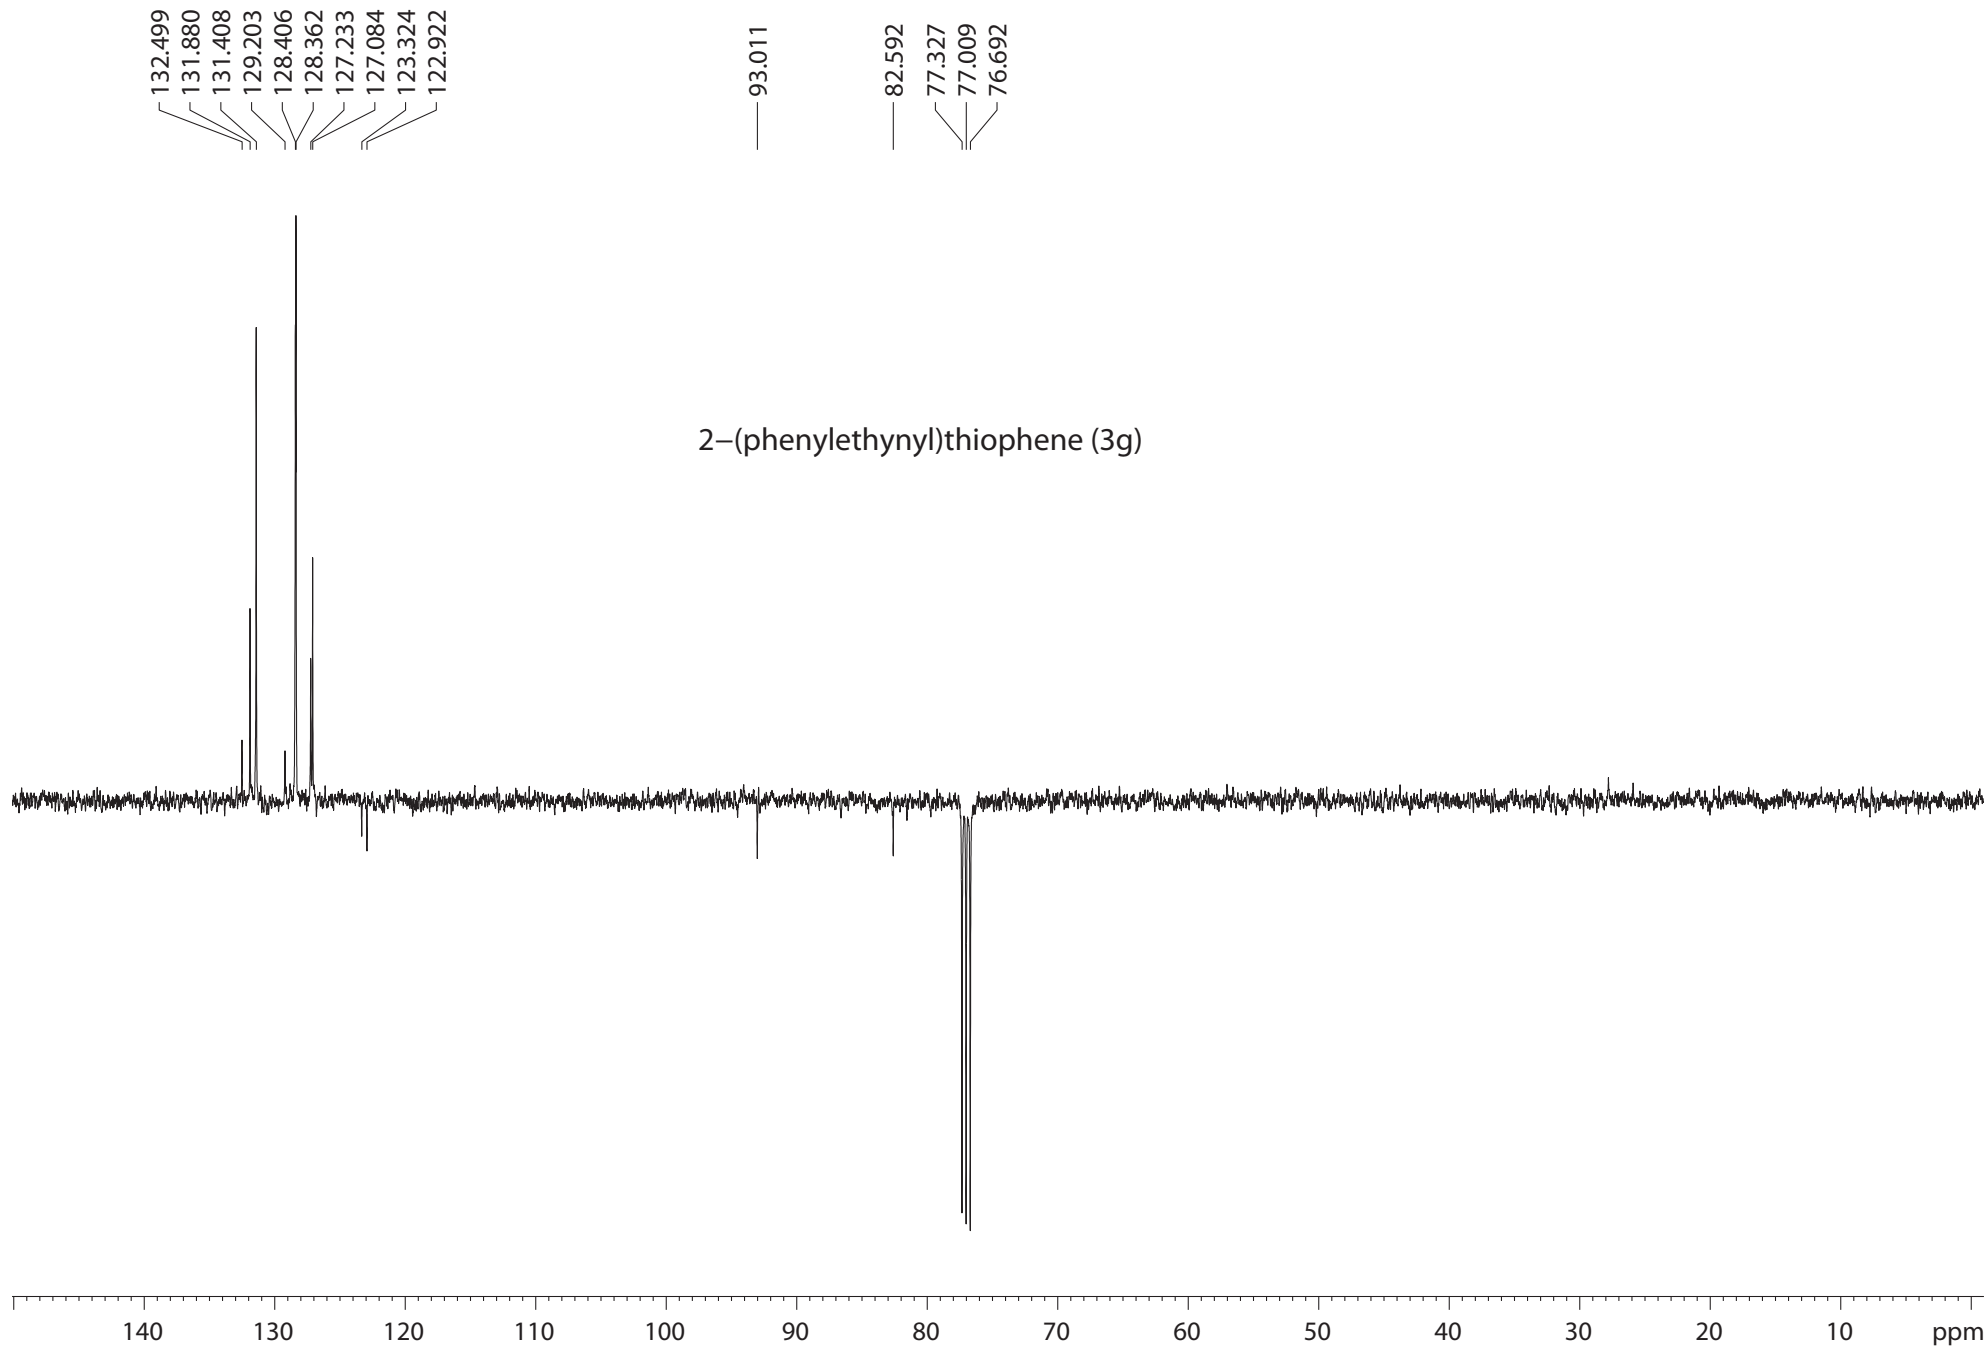

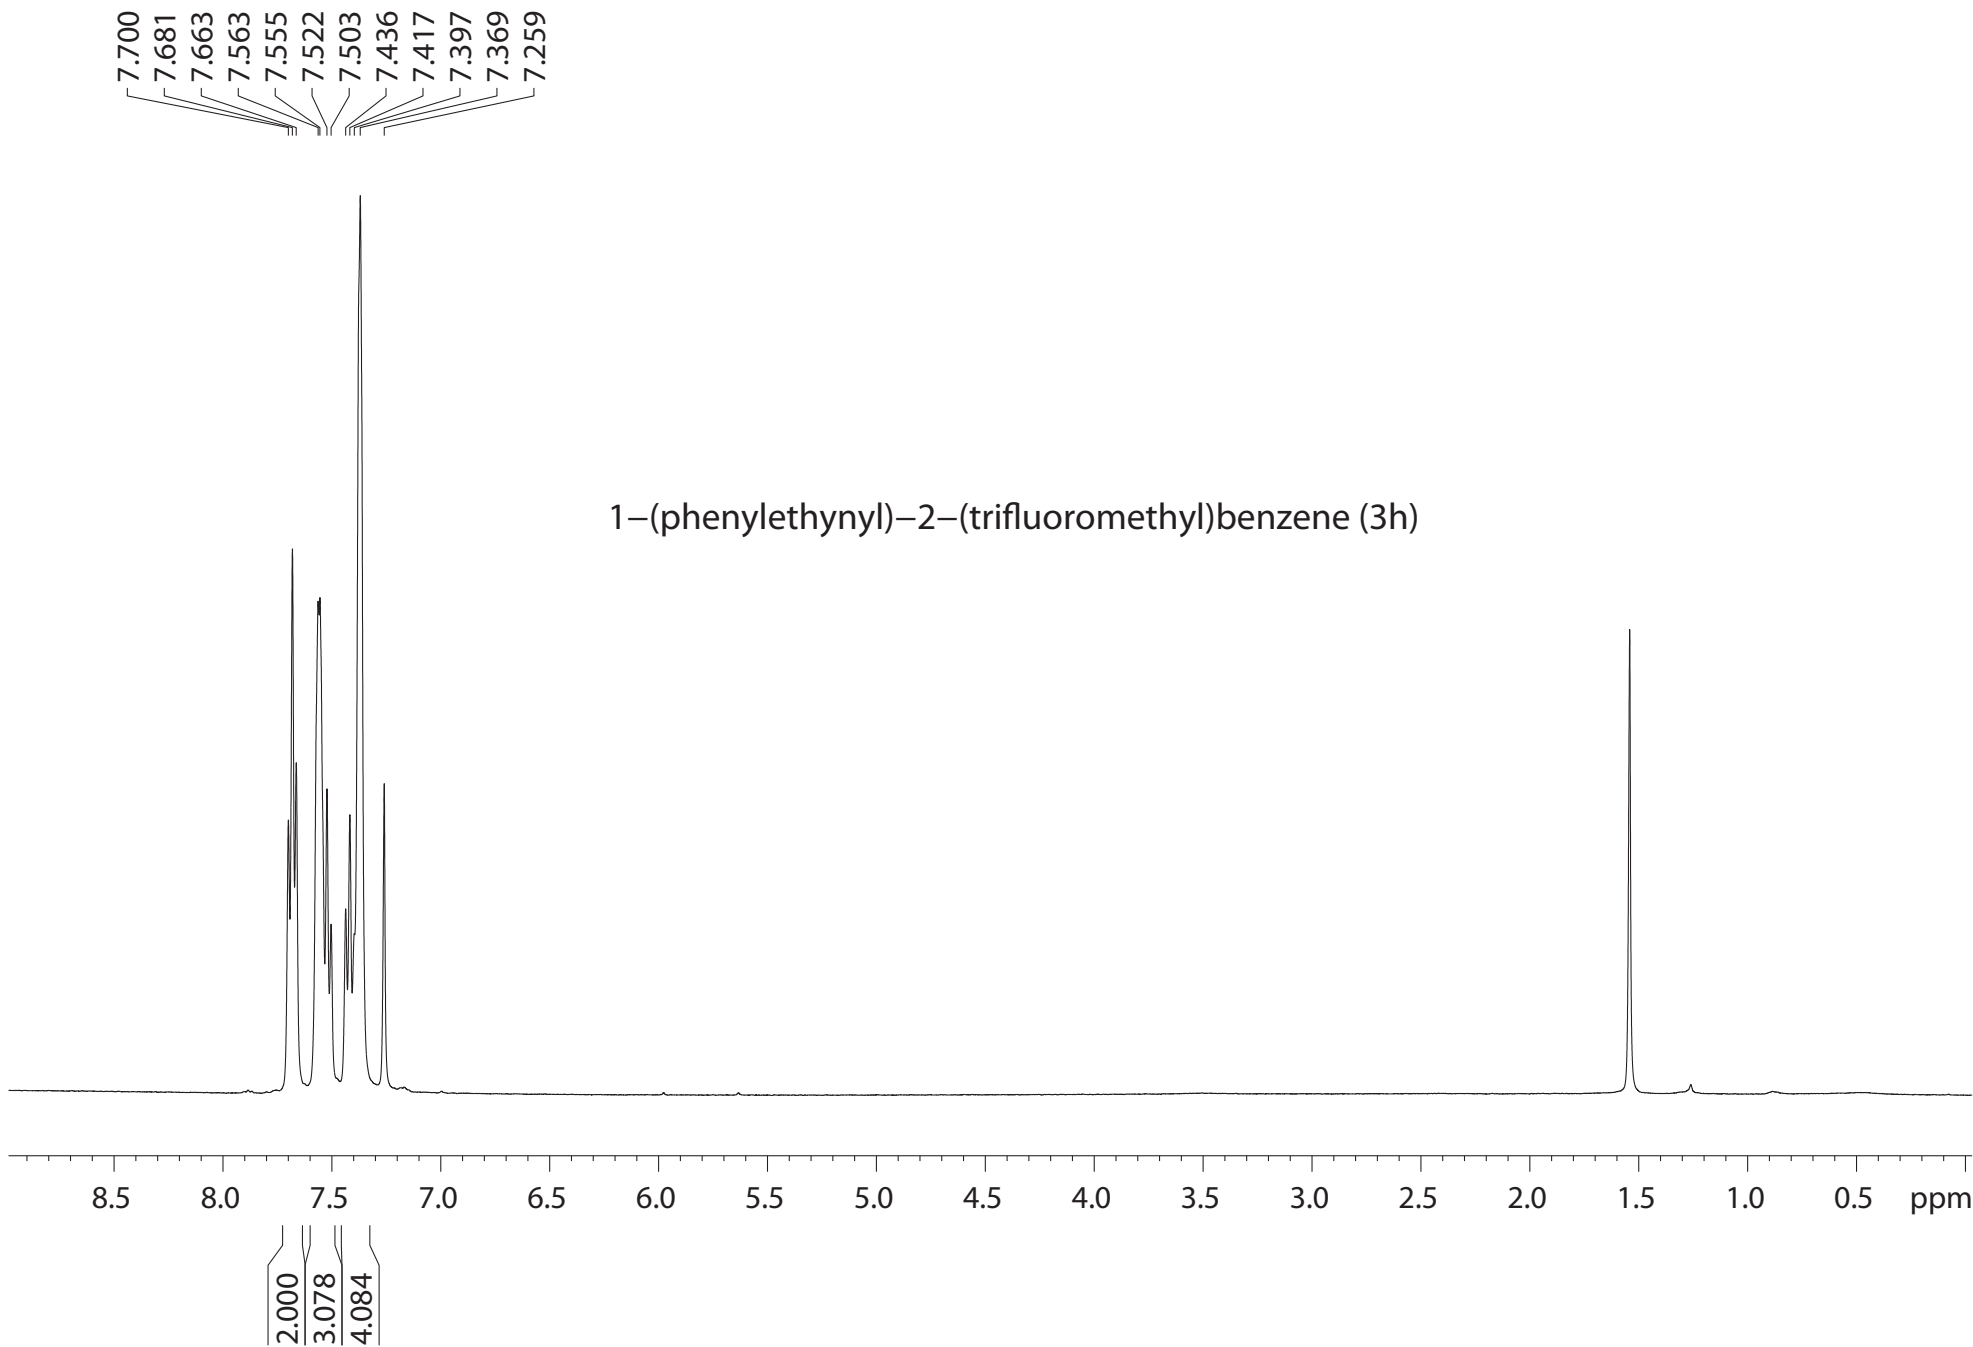

-62.704

1-(phenylethynyl)-2-(trifluoromethyl)benzene (3h)

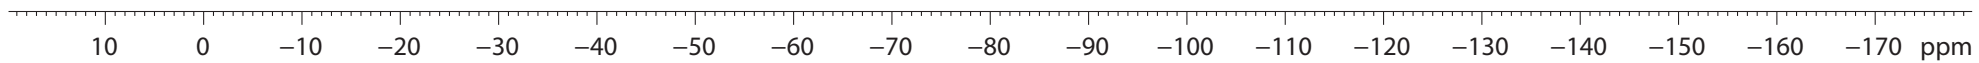

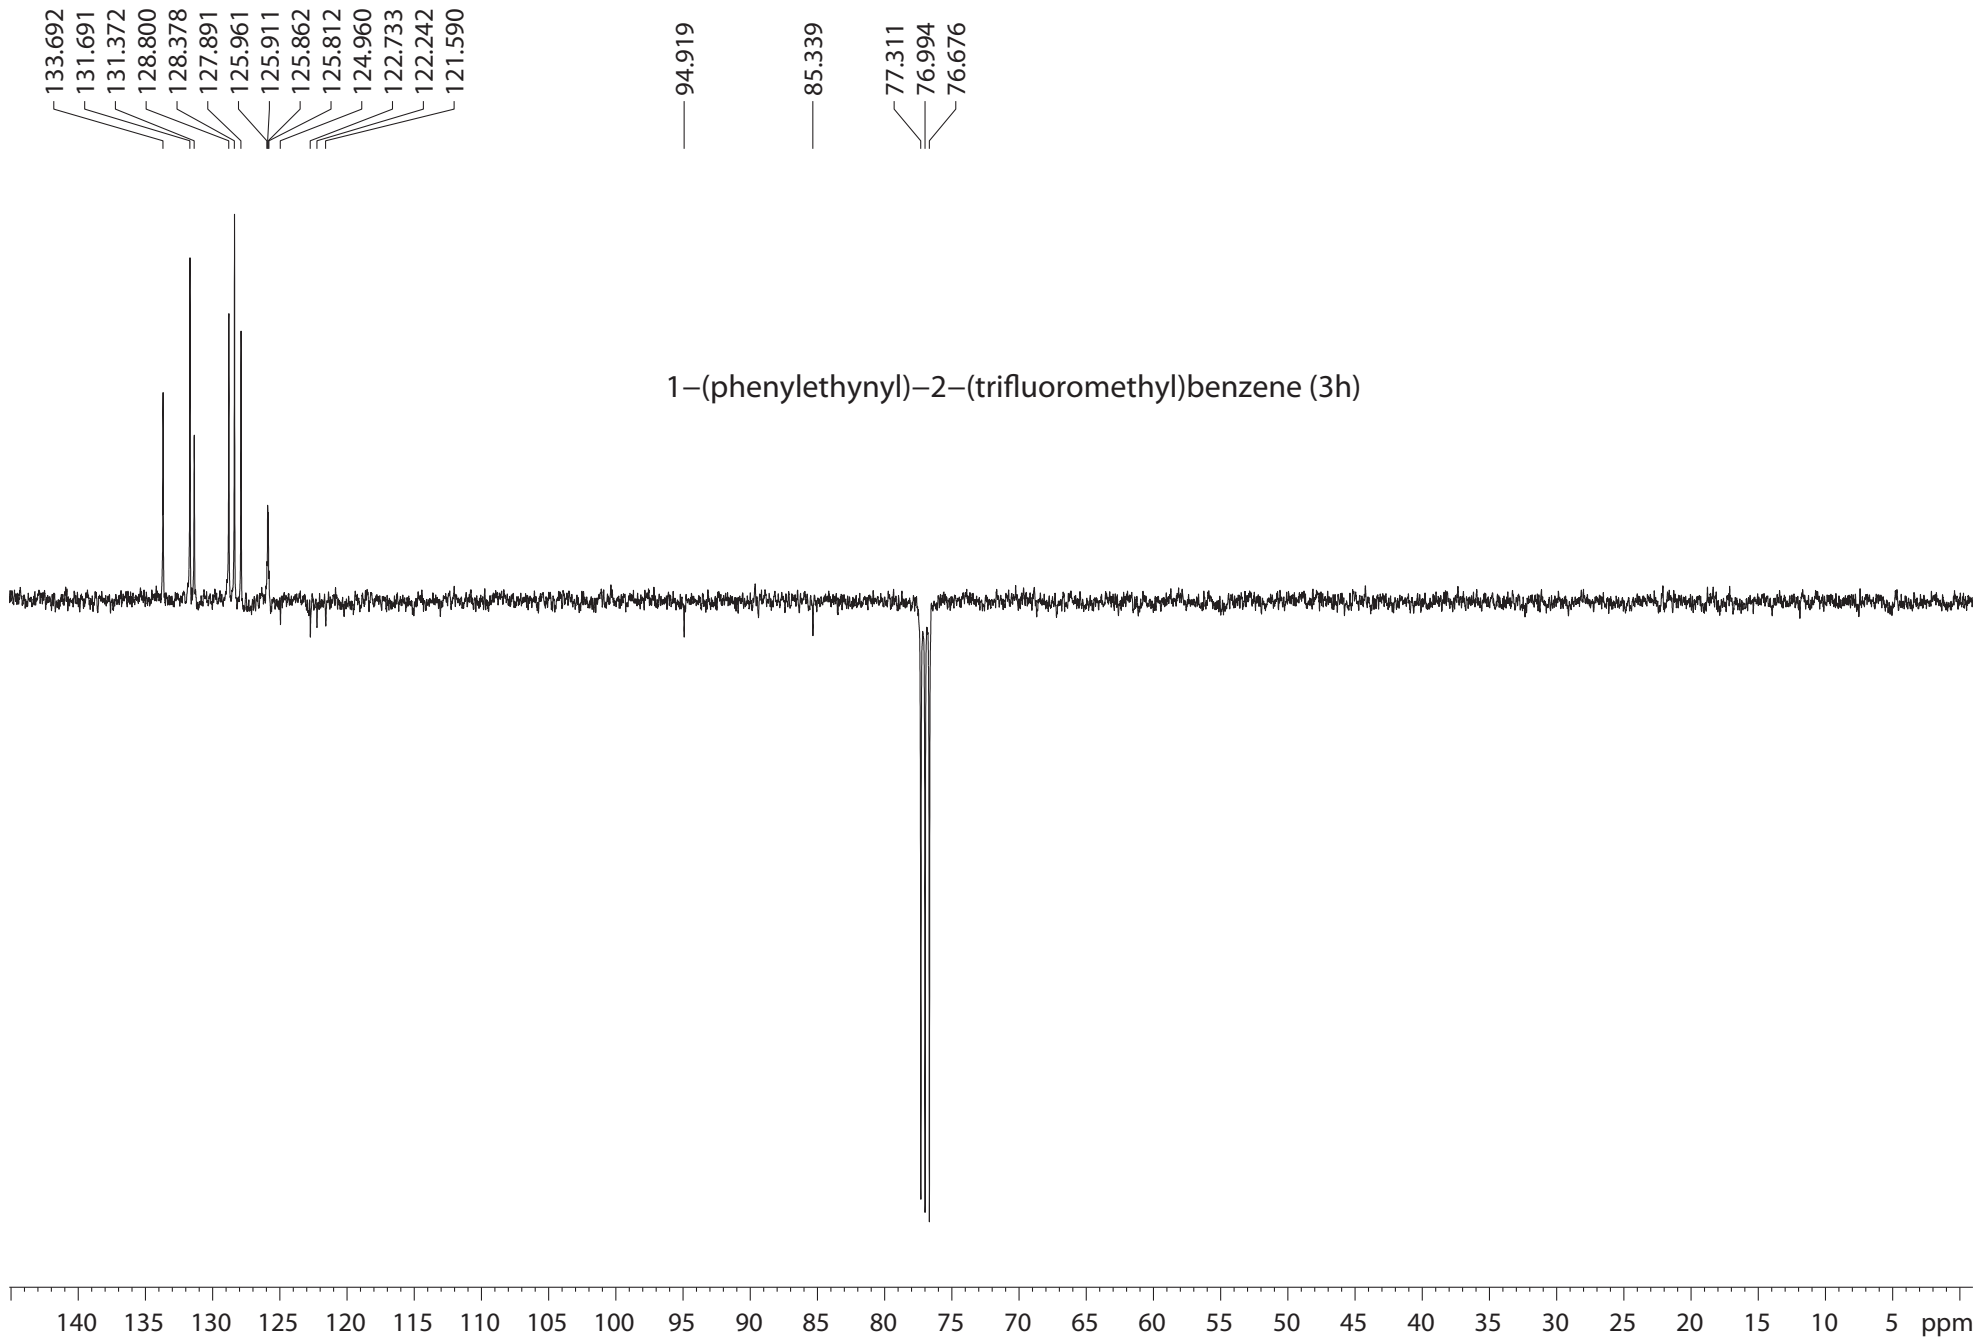

8.237  
8.215  
7.731  
7.709  
7.690  
7.670  
7.584  
7.566  
7.547  
7.509  
7.490  
7.471  
7.259

1-((4-nitrophenyl)ethynyl)-2-(trifluoromethyl)benzene (3i)

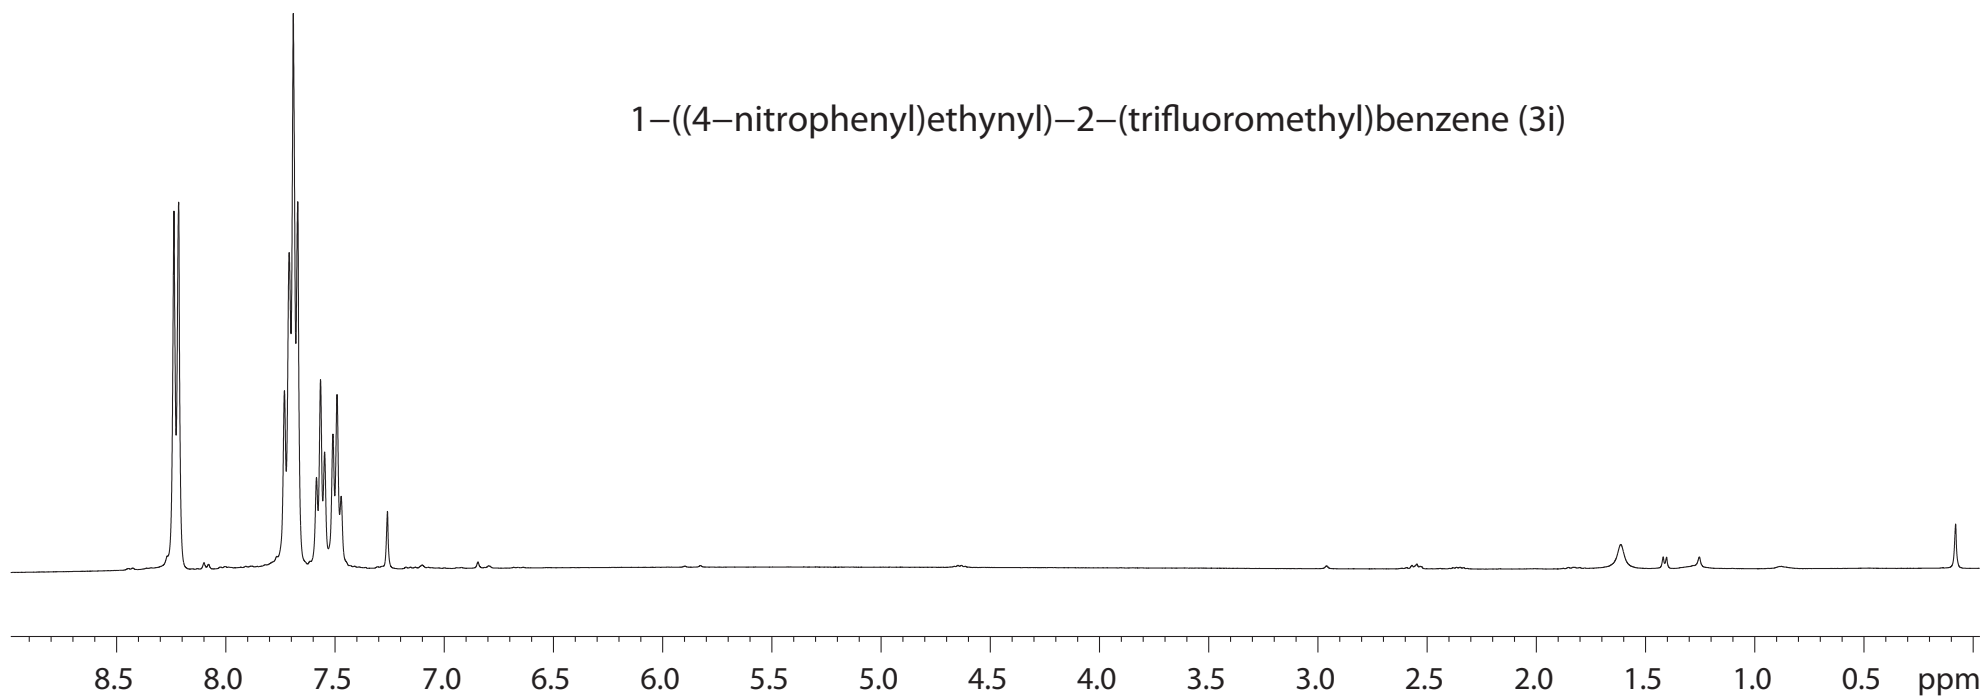

2.000  
4.142  
1.093  
1.118



-62.626

1-((4-nitrophenyl)ethynyl)-2-(trifluoromethyl)benzene (3i)

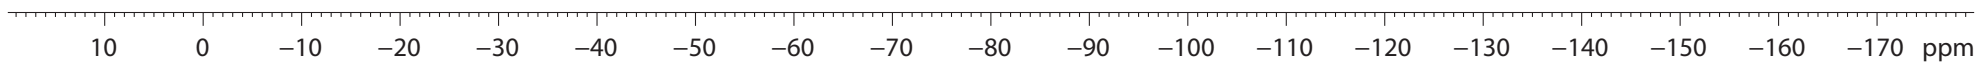

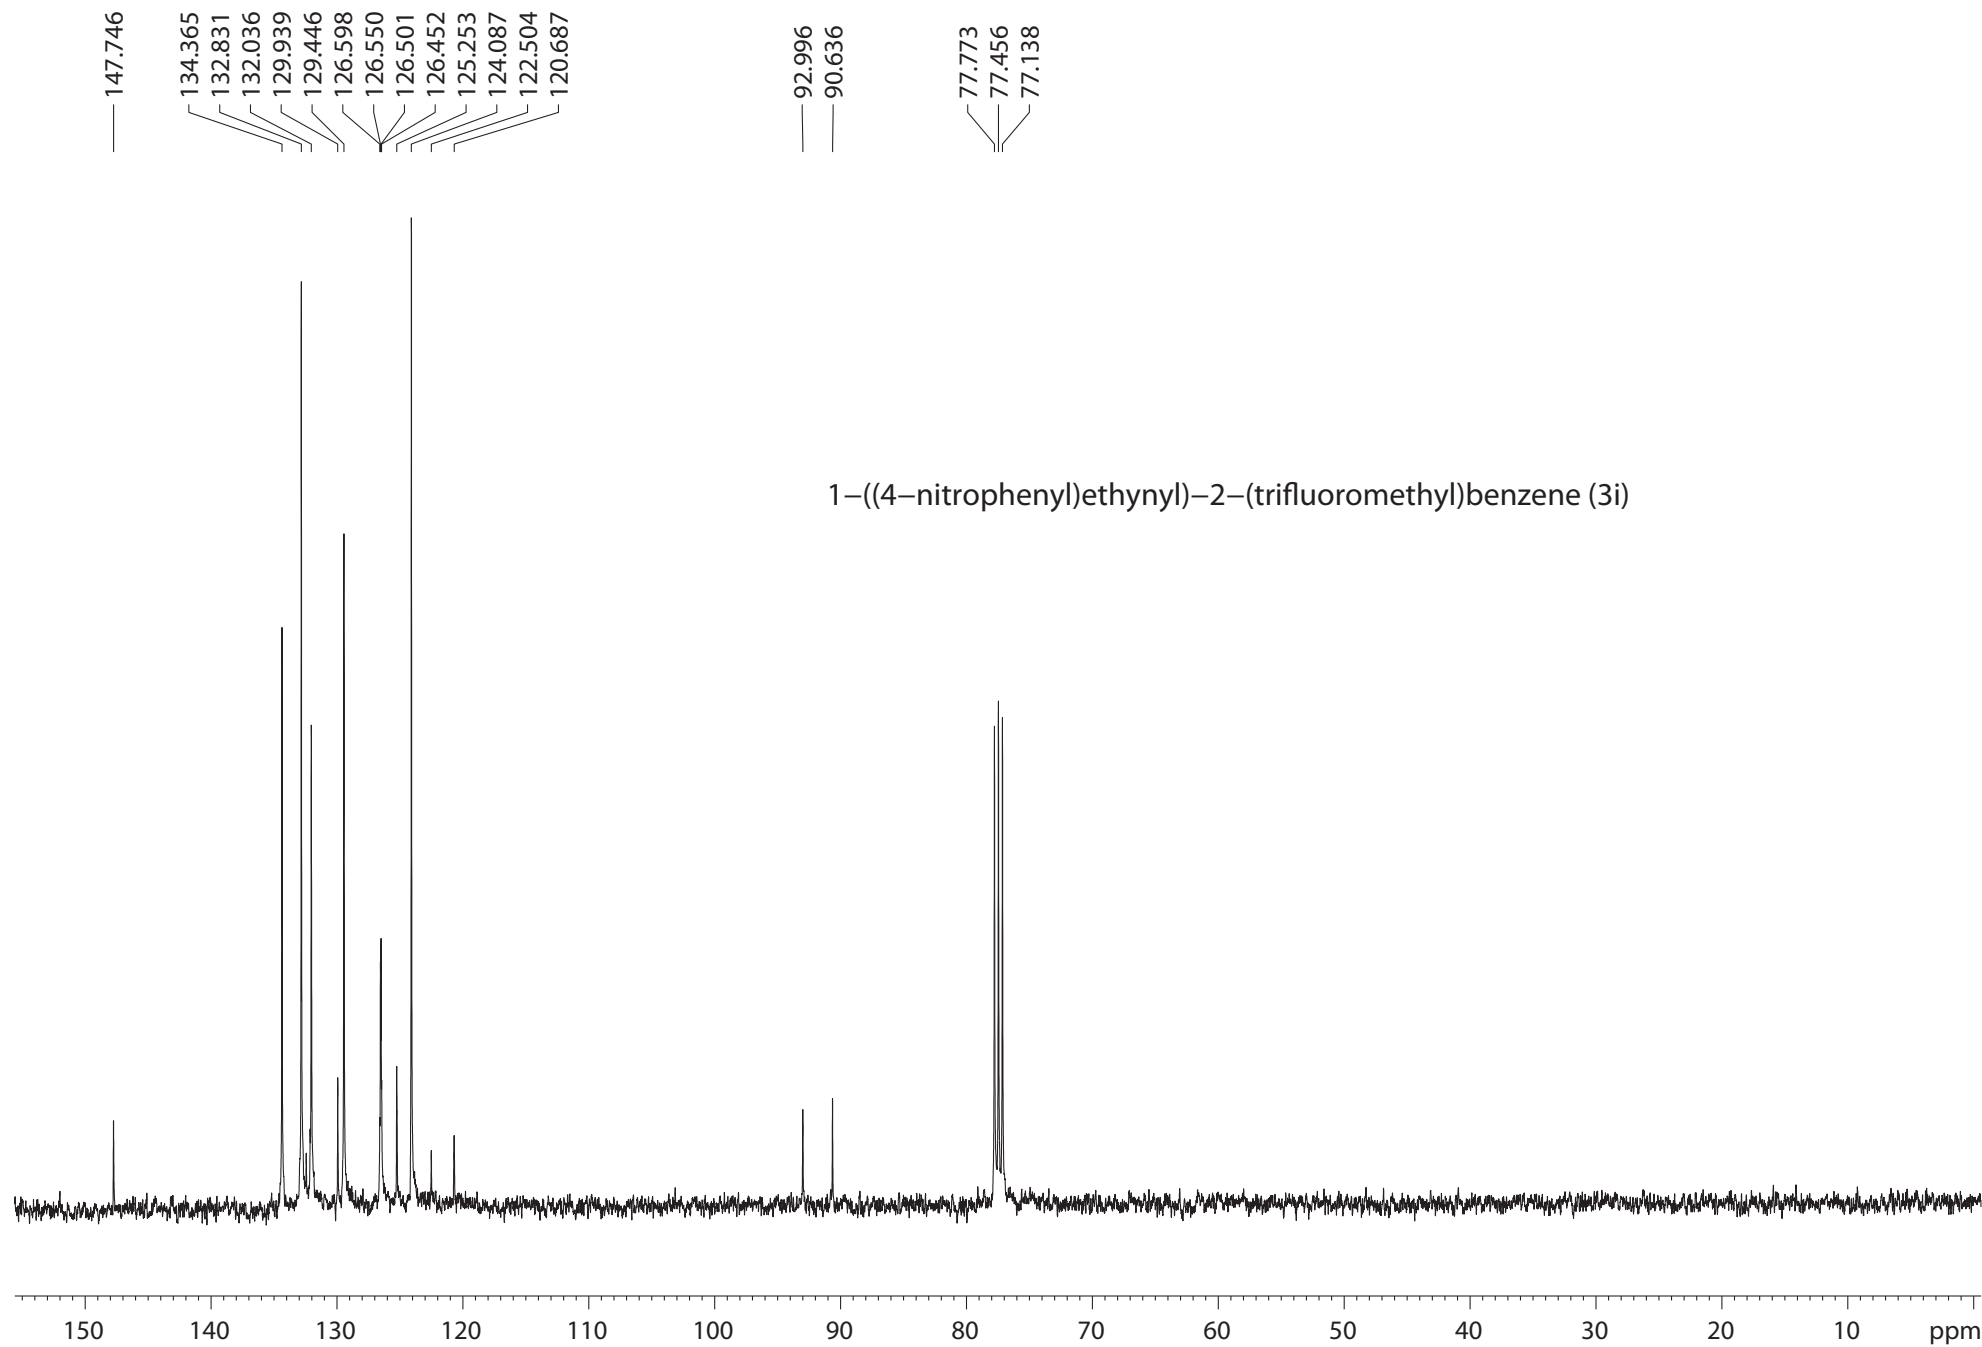

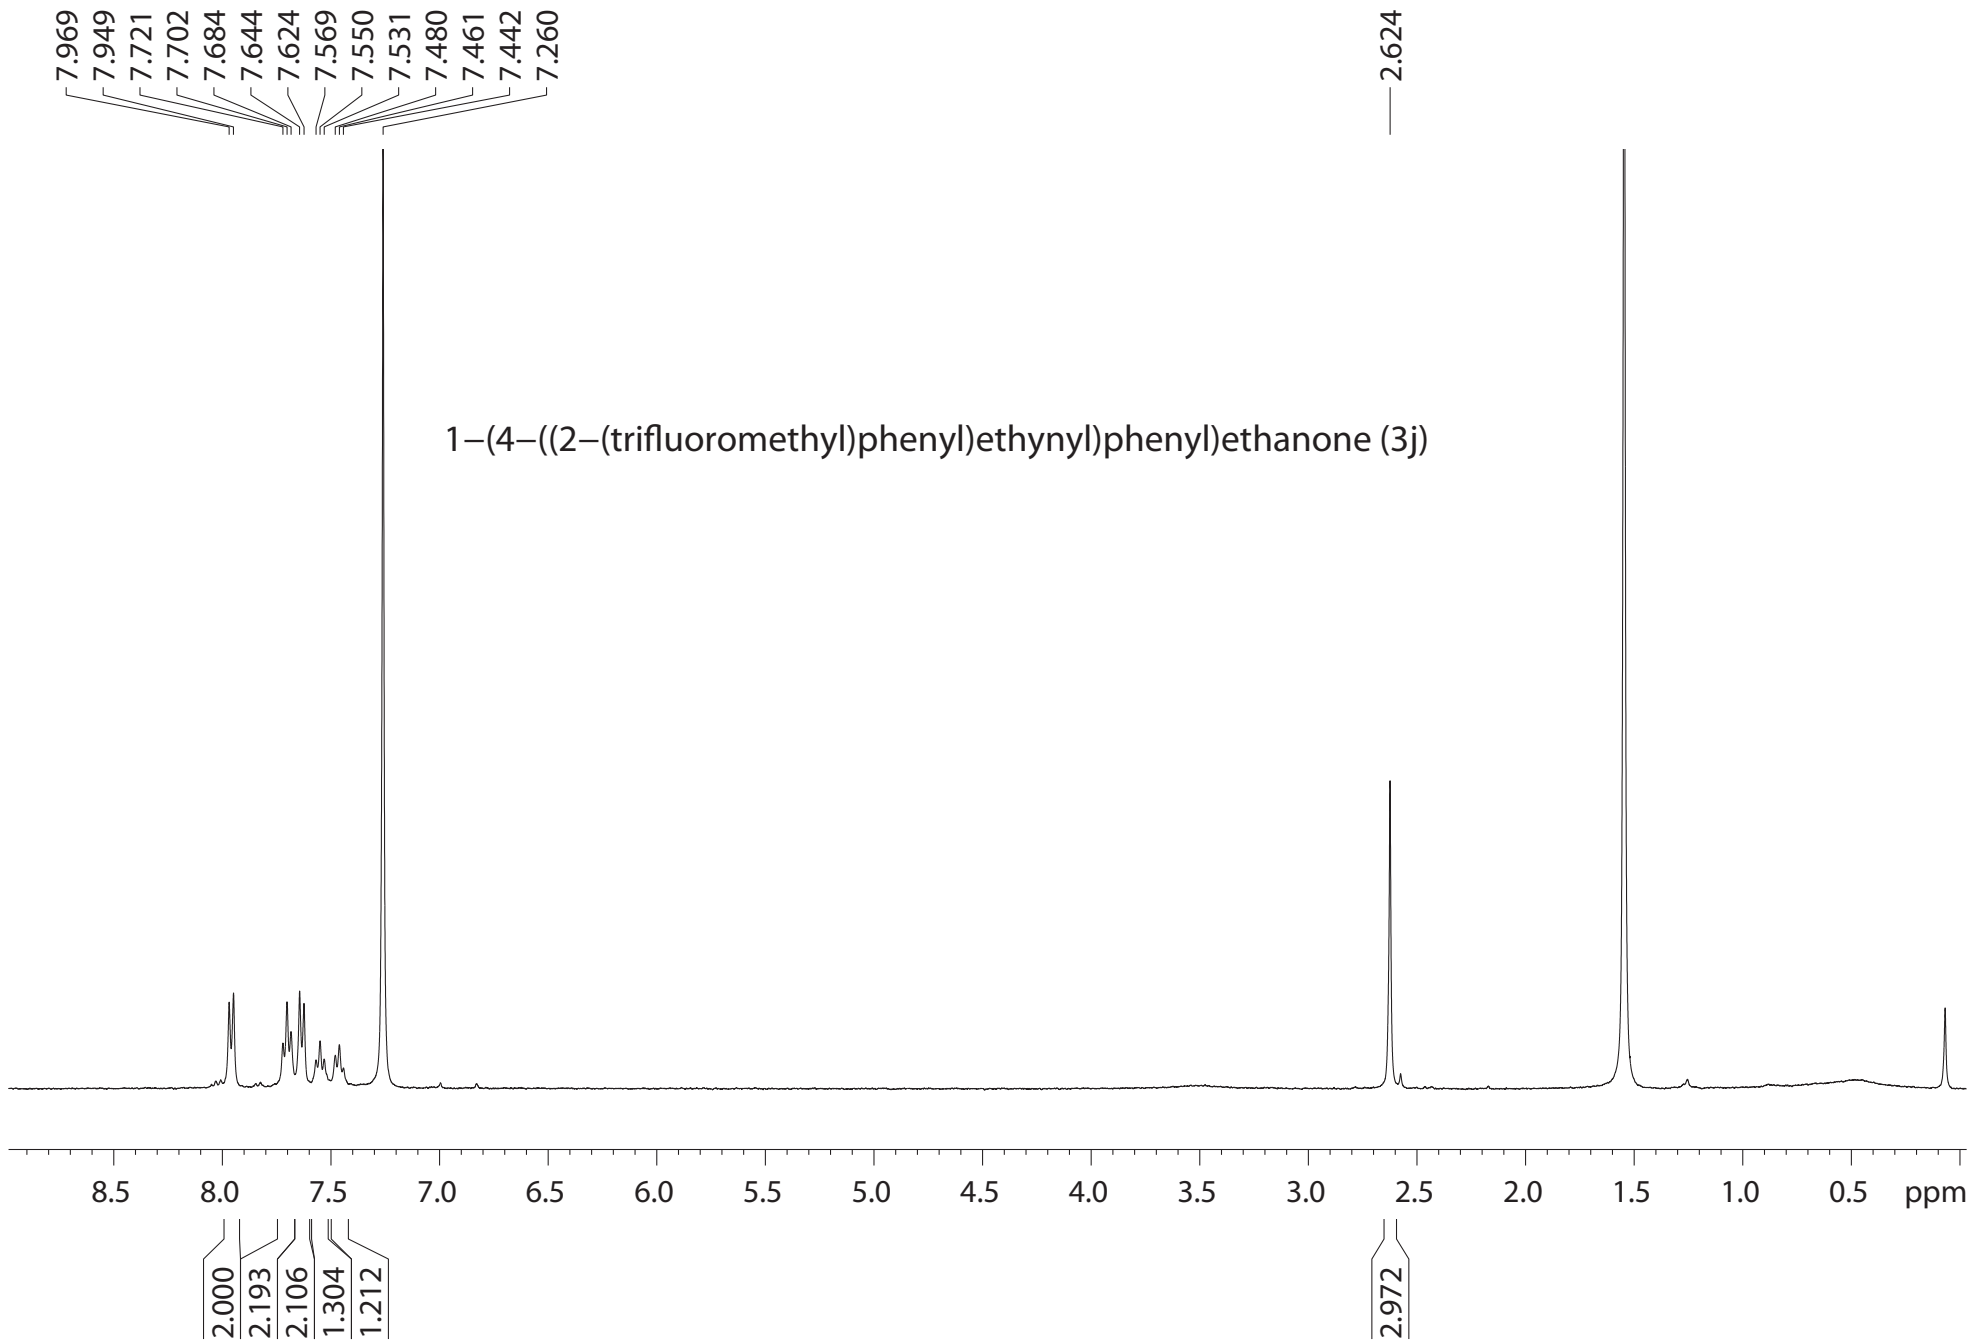

-62.699

1-(4-((2-(trifluoromethyl)phenyl)ethynyl)phenyl)ethanone (3j)

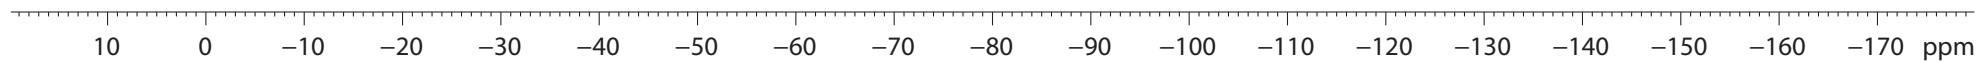

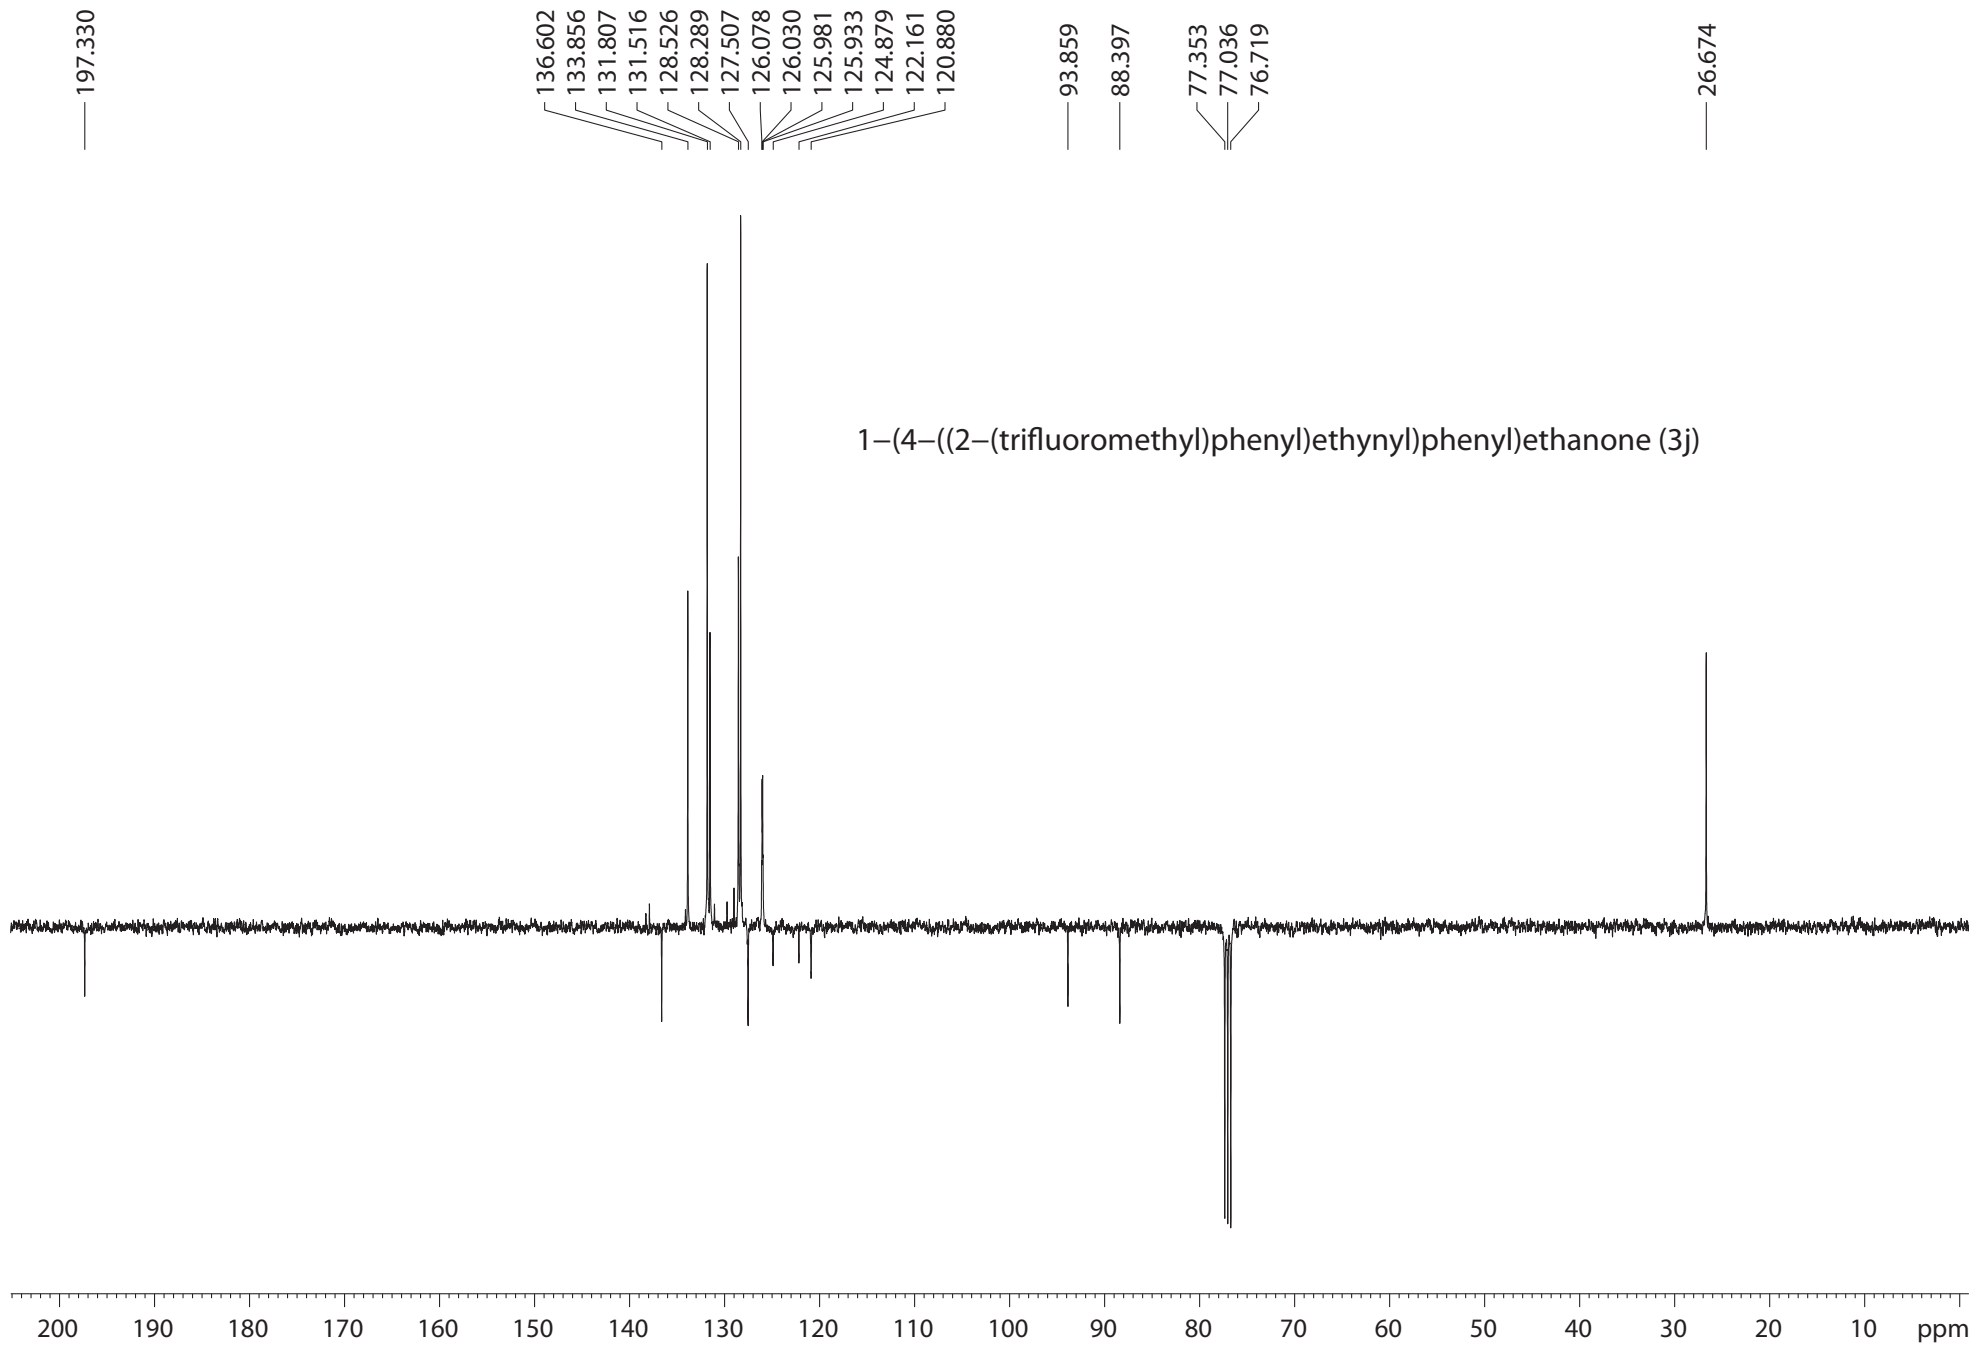

7.689  
7.668  
7.647  
7.528  
7.509  
7.490  
7.463  
7.443  
7.418  
7.399  
7.380  
7.259  
7.187  
7.168

2.382

1-(p-tolylethynyl)-2-(trifluoromethyl)benzene (3k)

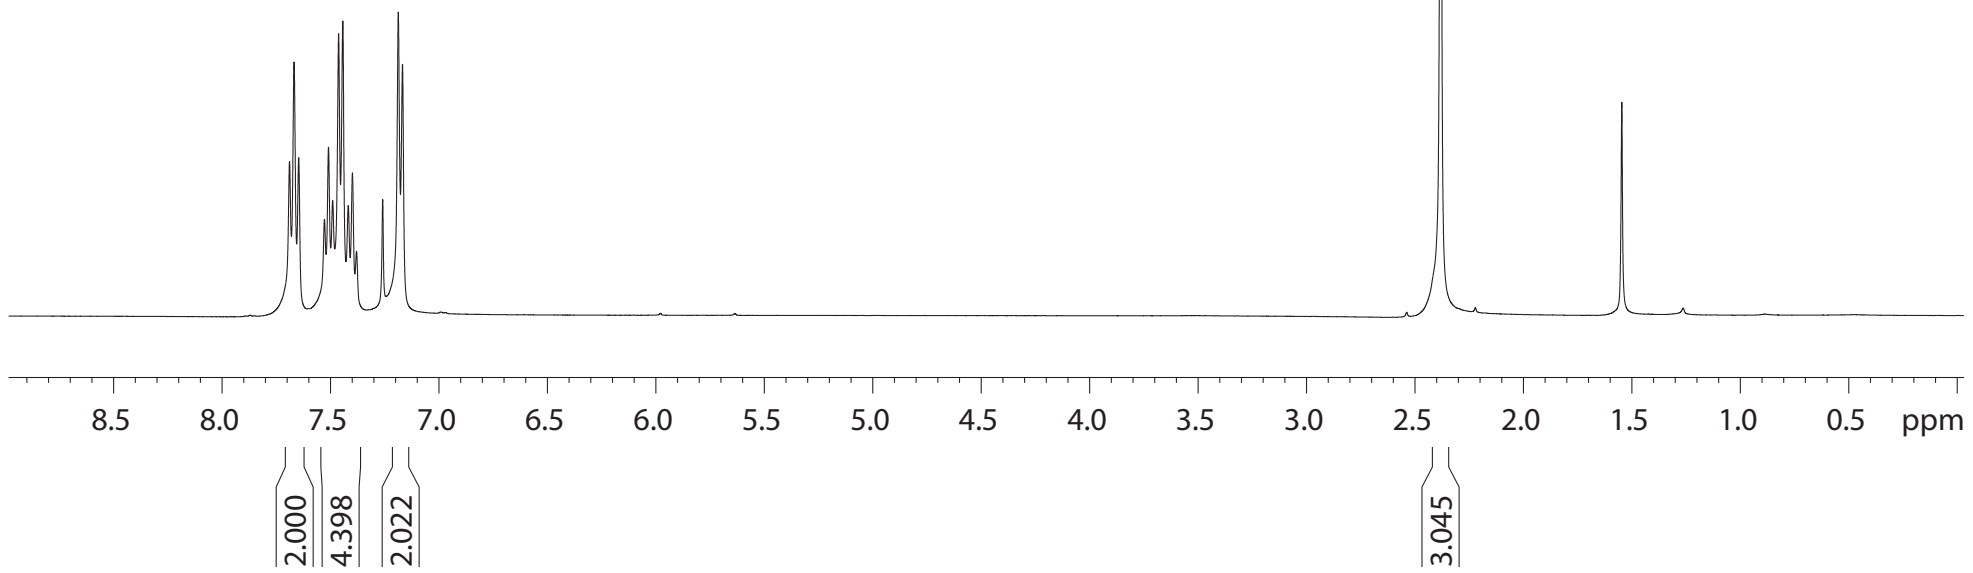

1-(p-tolylolethynyl)-2-(trifluoromethyl)benzene (3k)

-62.654

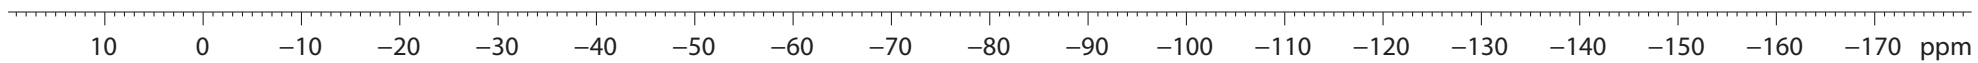

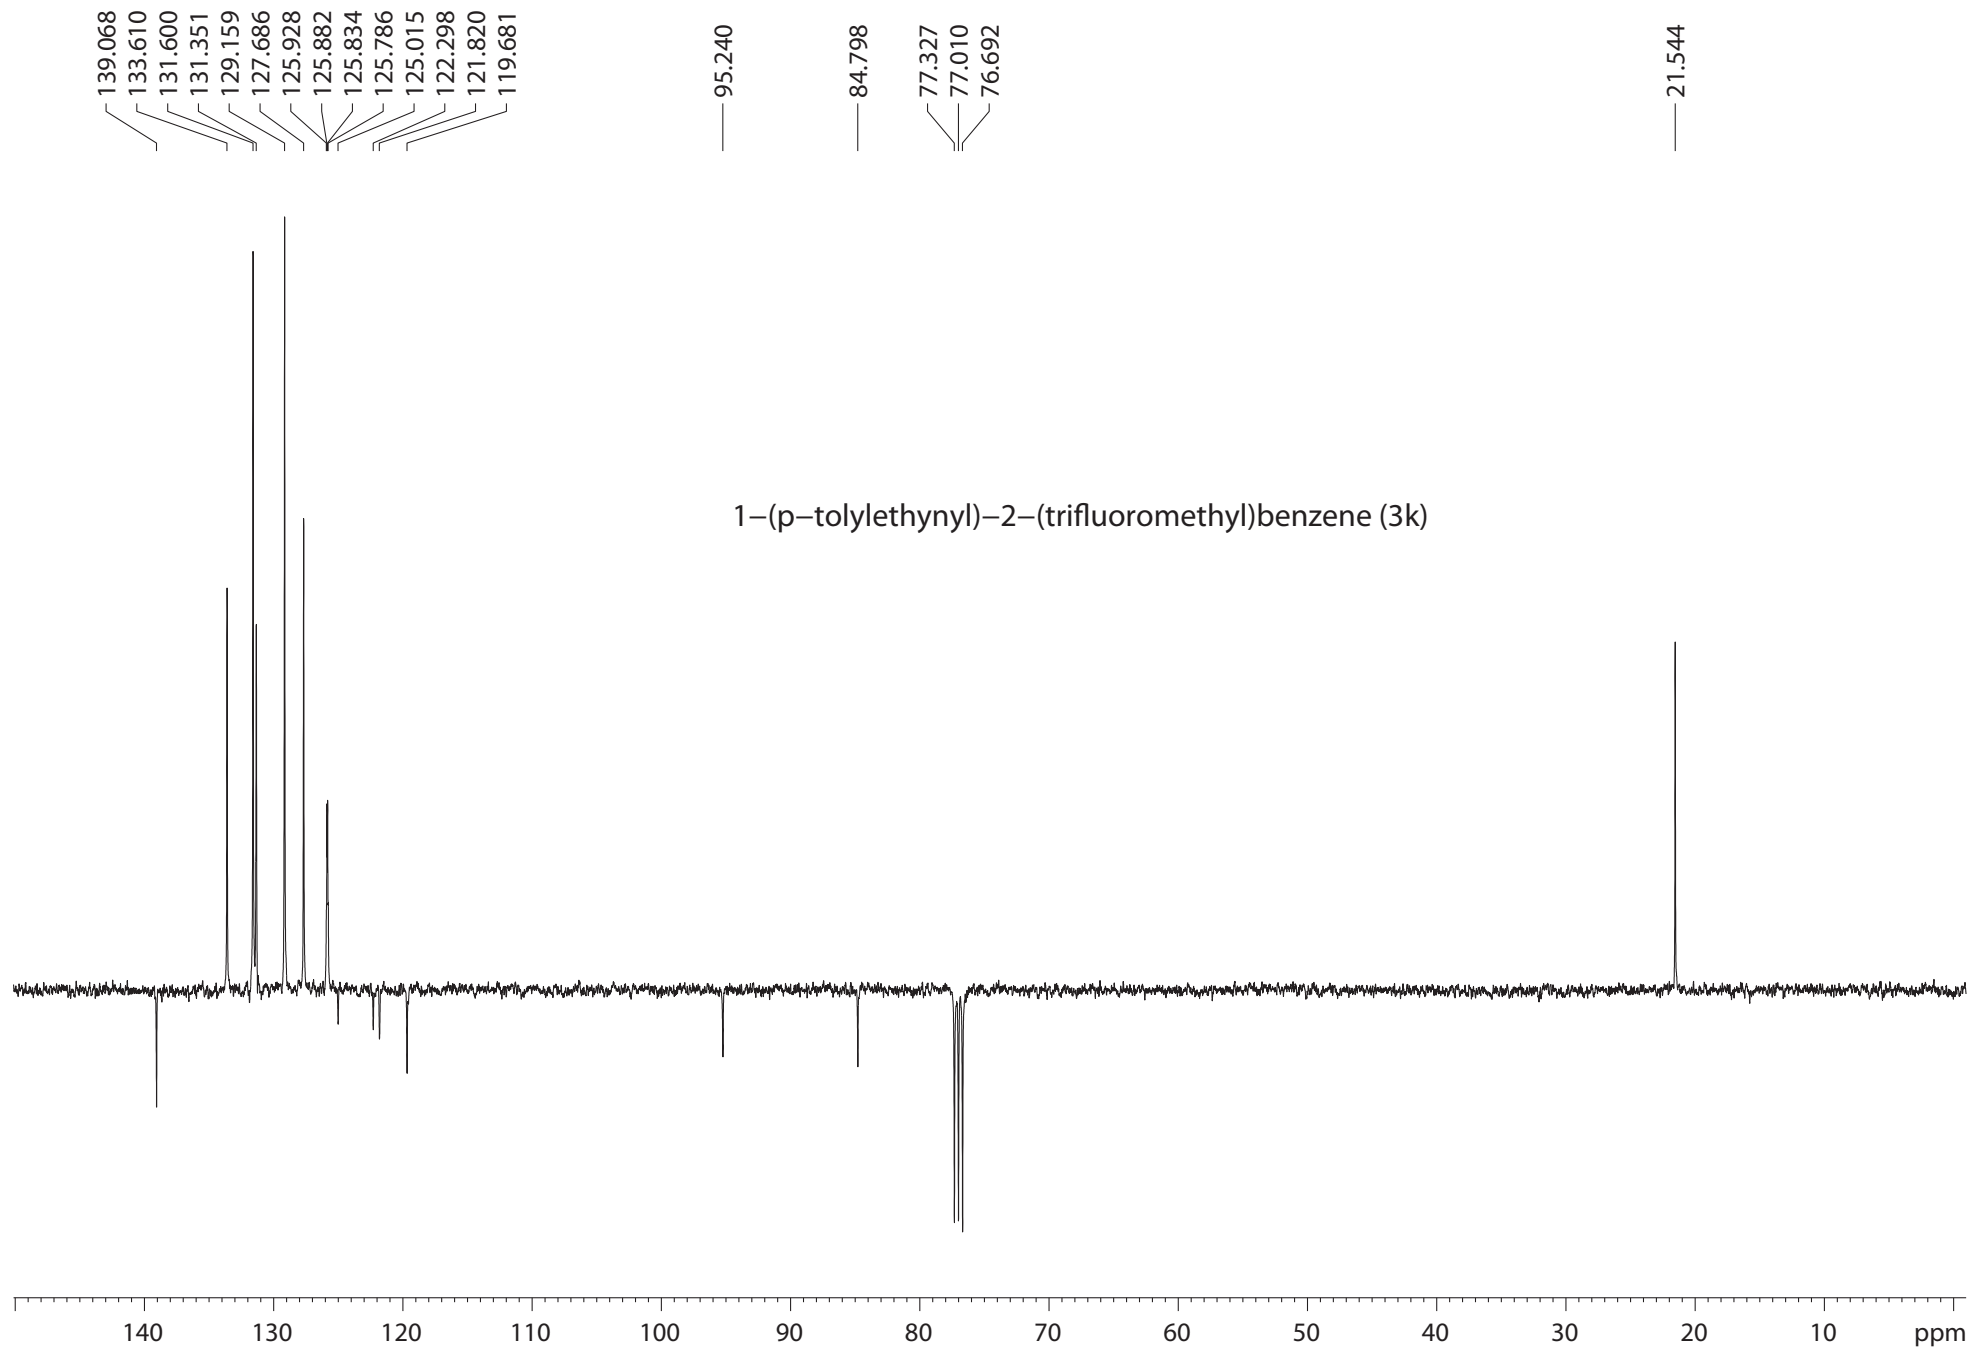



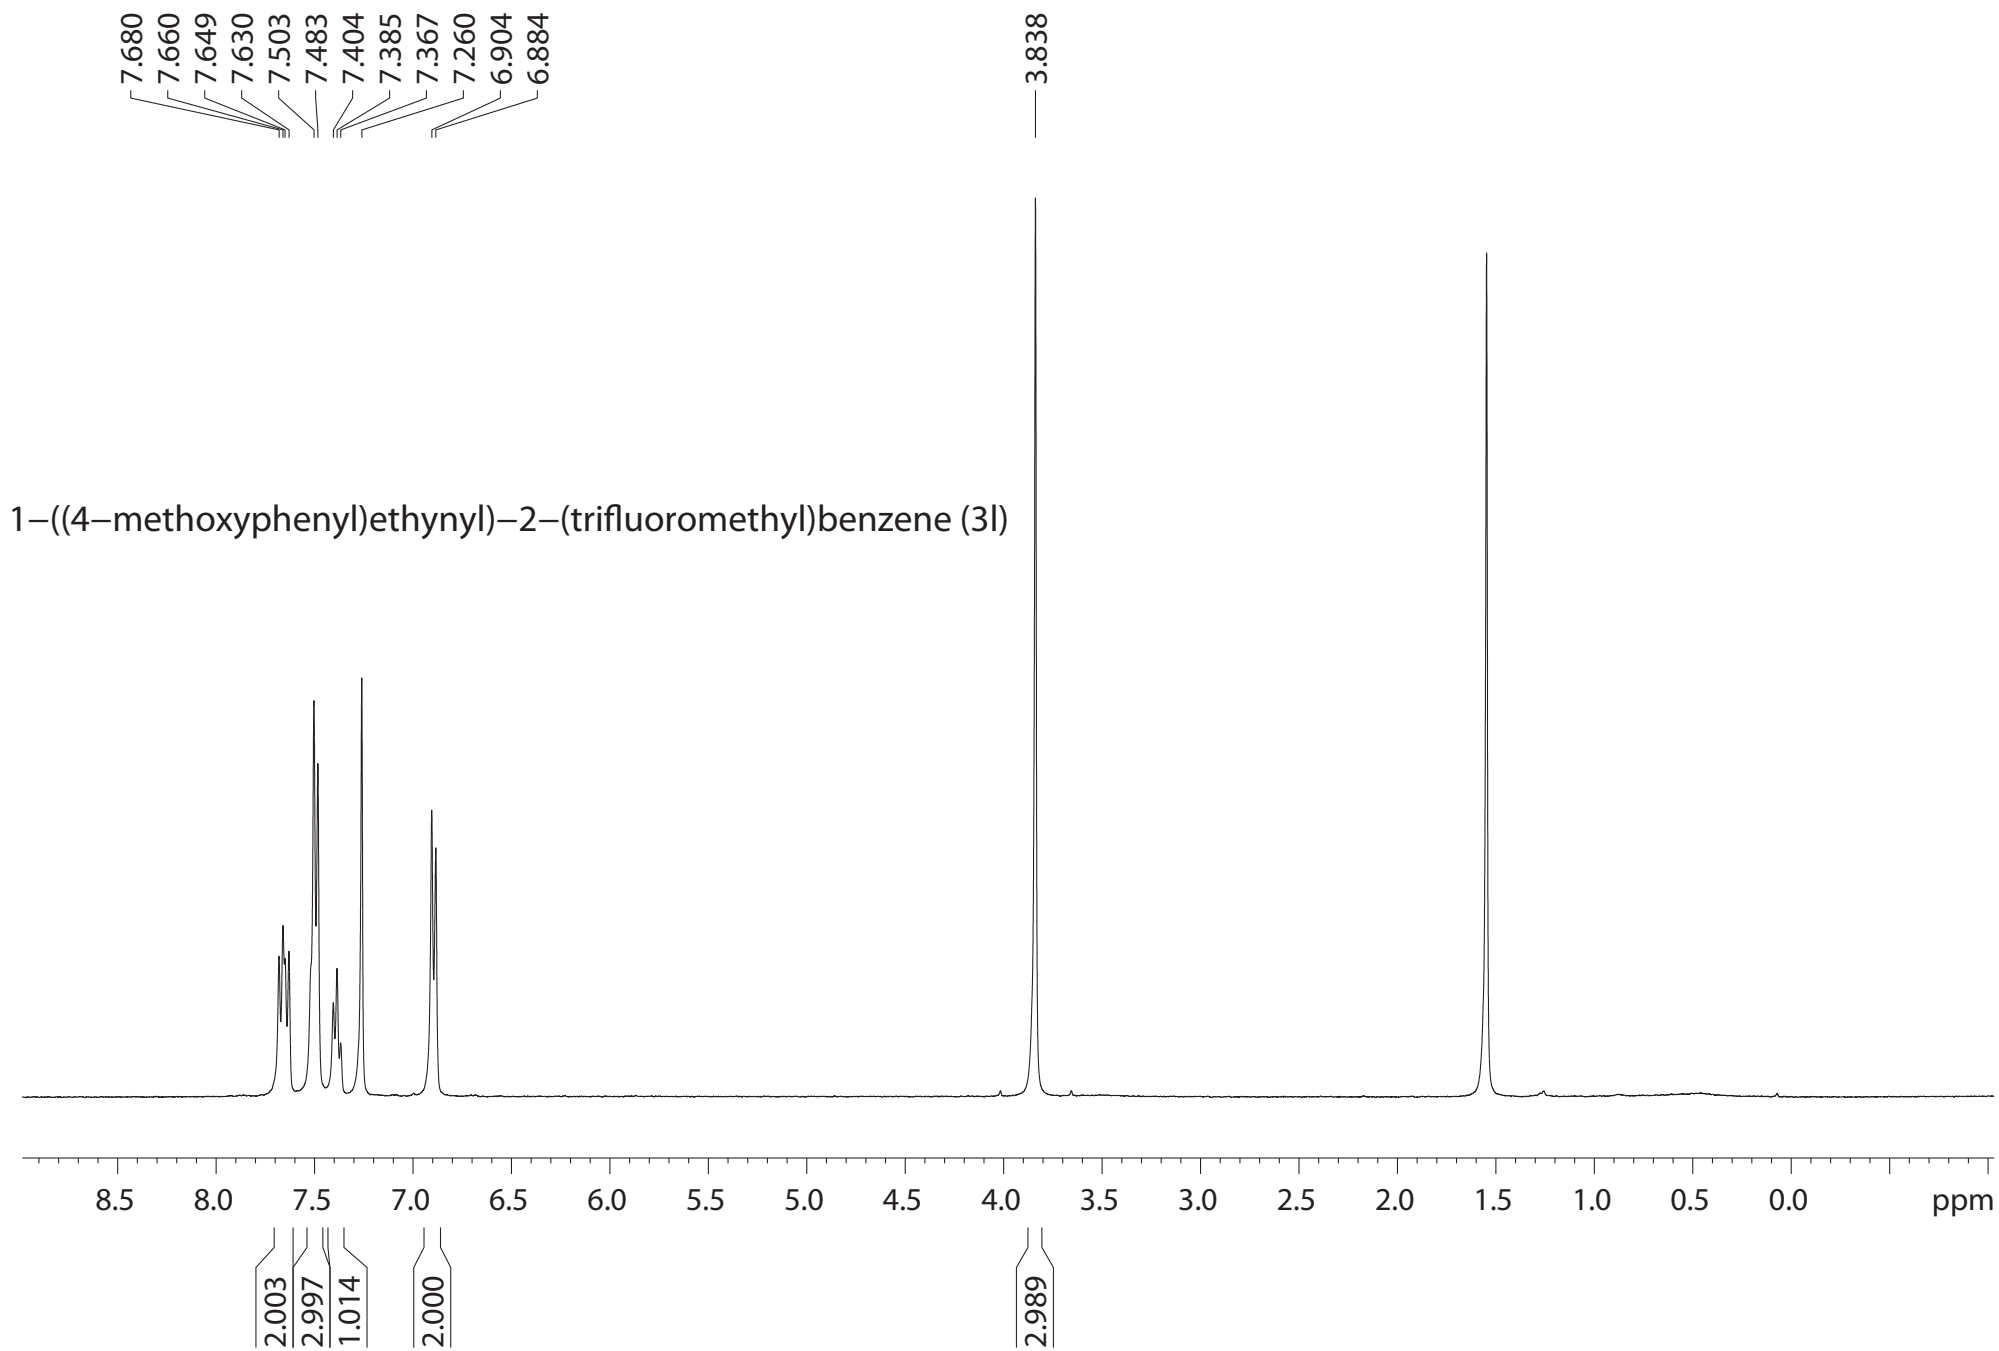

-62.867

1-((4-methoxyphenyl)ethynyl)-2-(trifluoromethyl)benzene (3l)

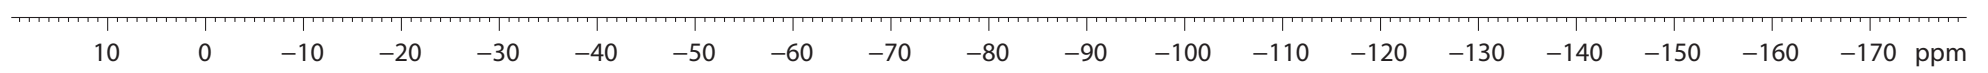

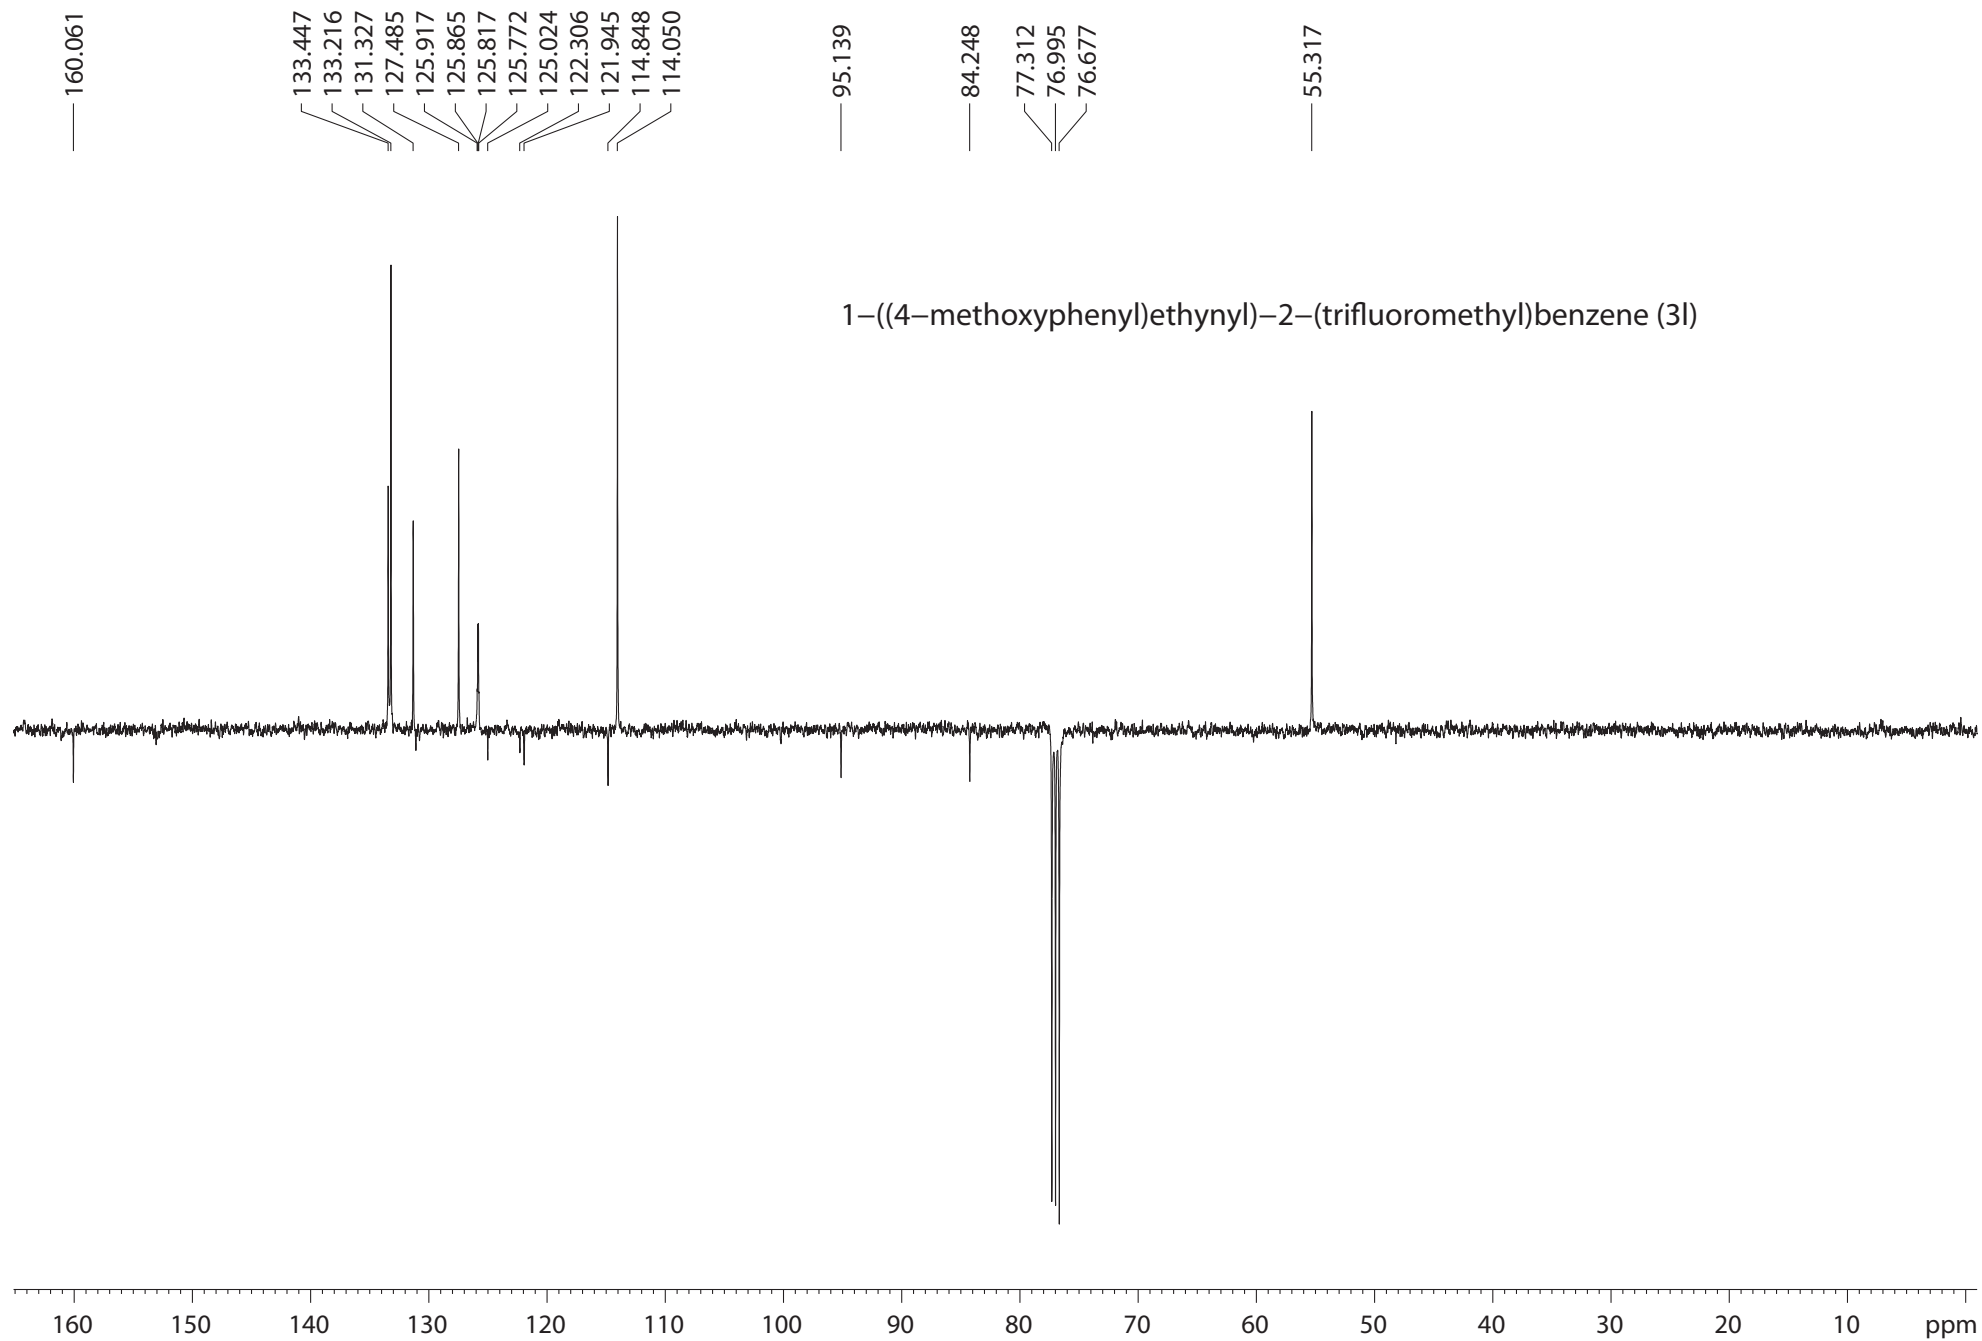

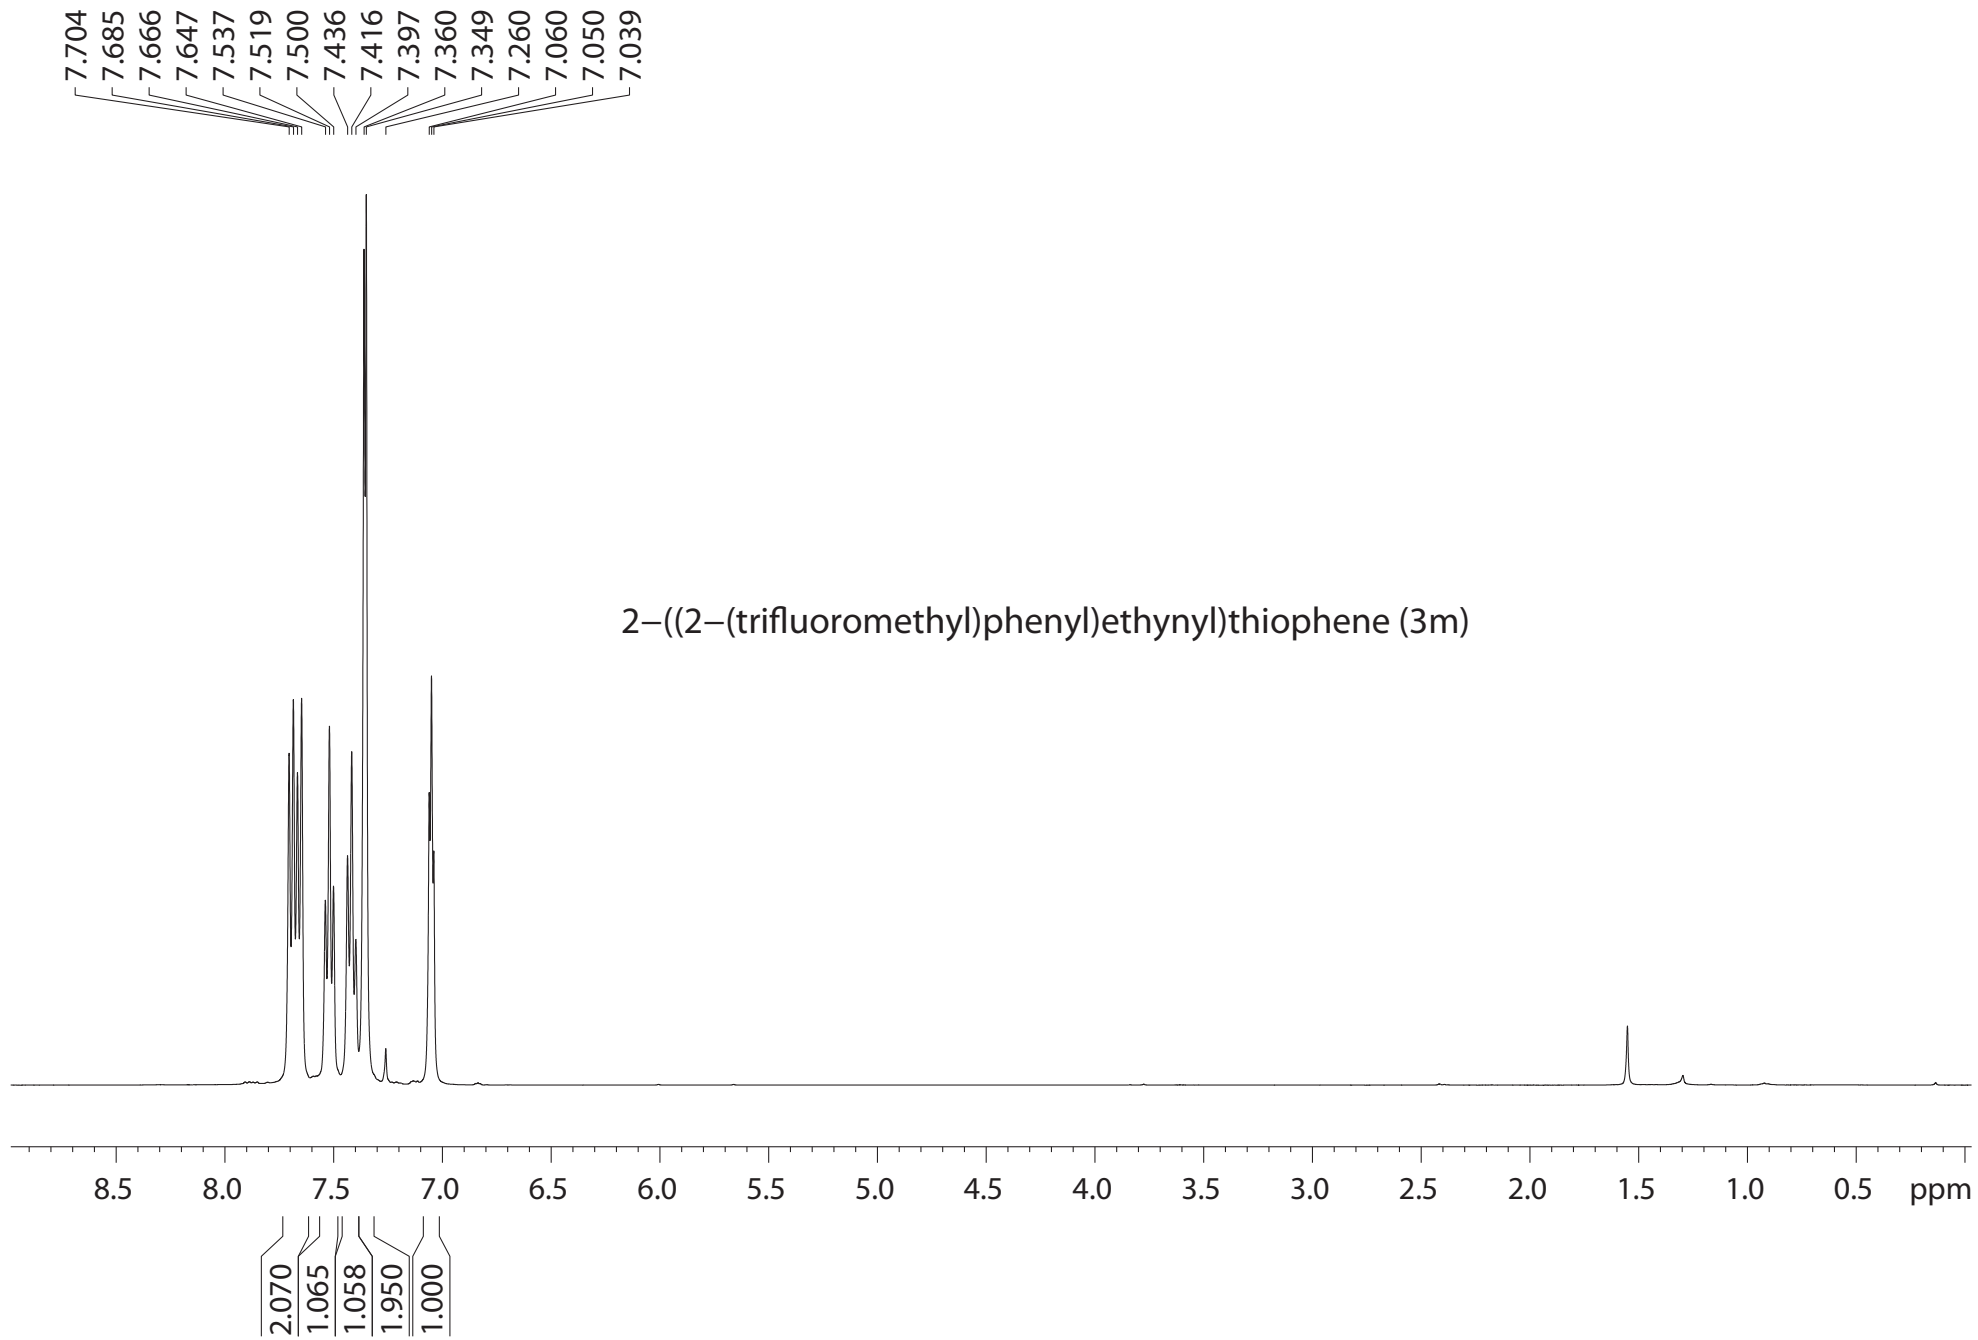

-62.721

2-((2-(trifluoromethyl)phenyl)ethynyl)thiophene (3m)

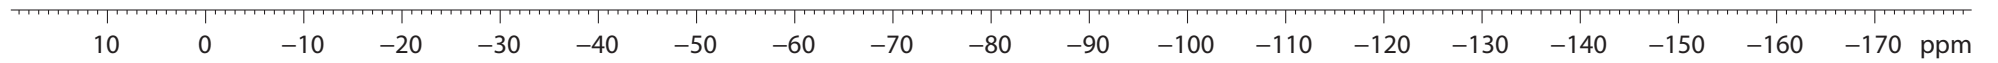

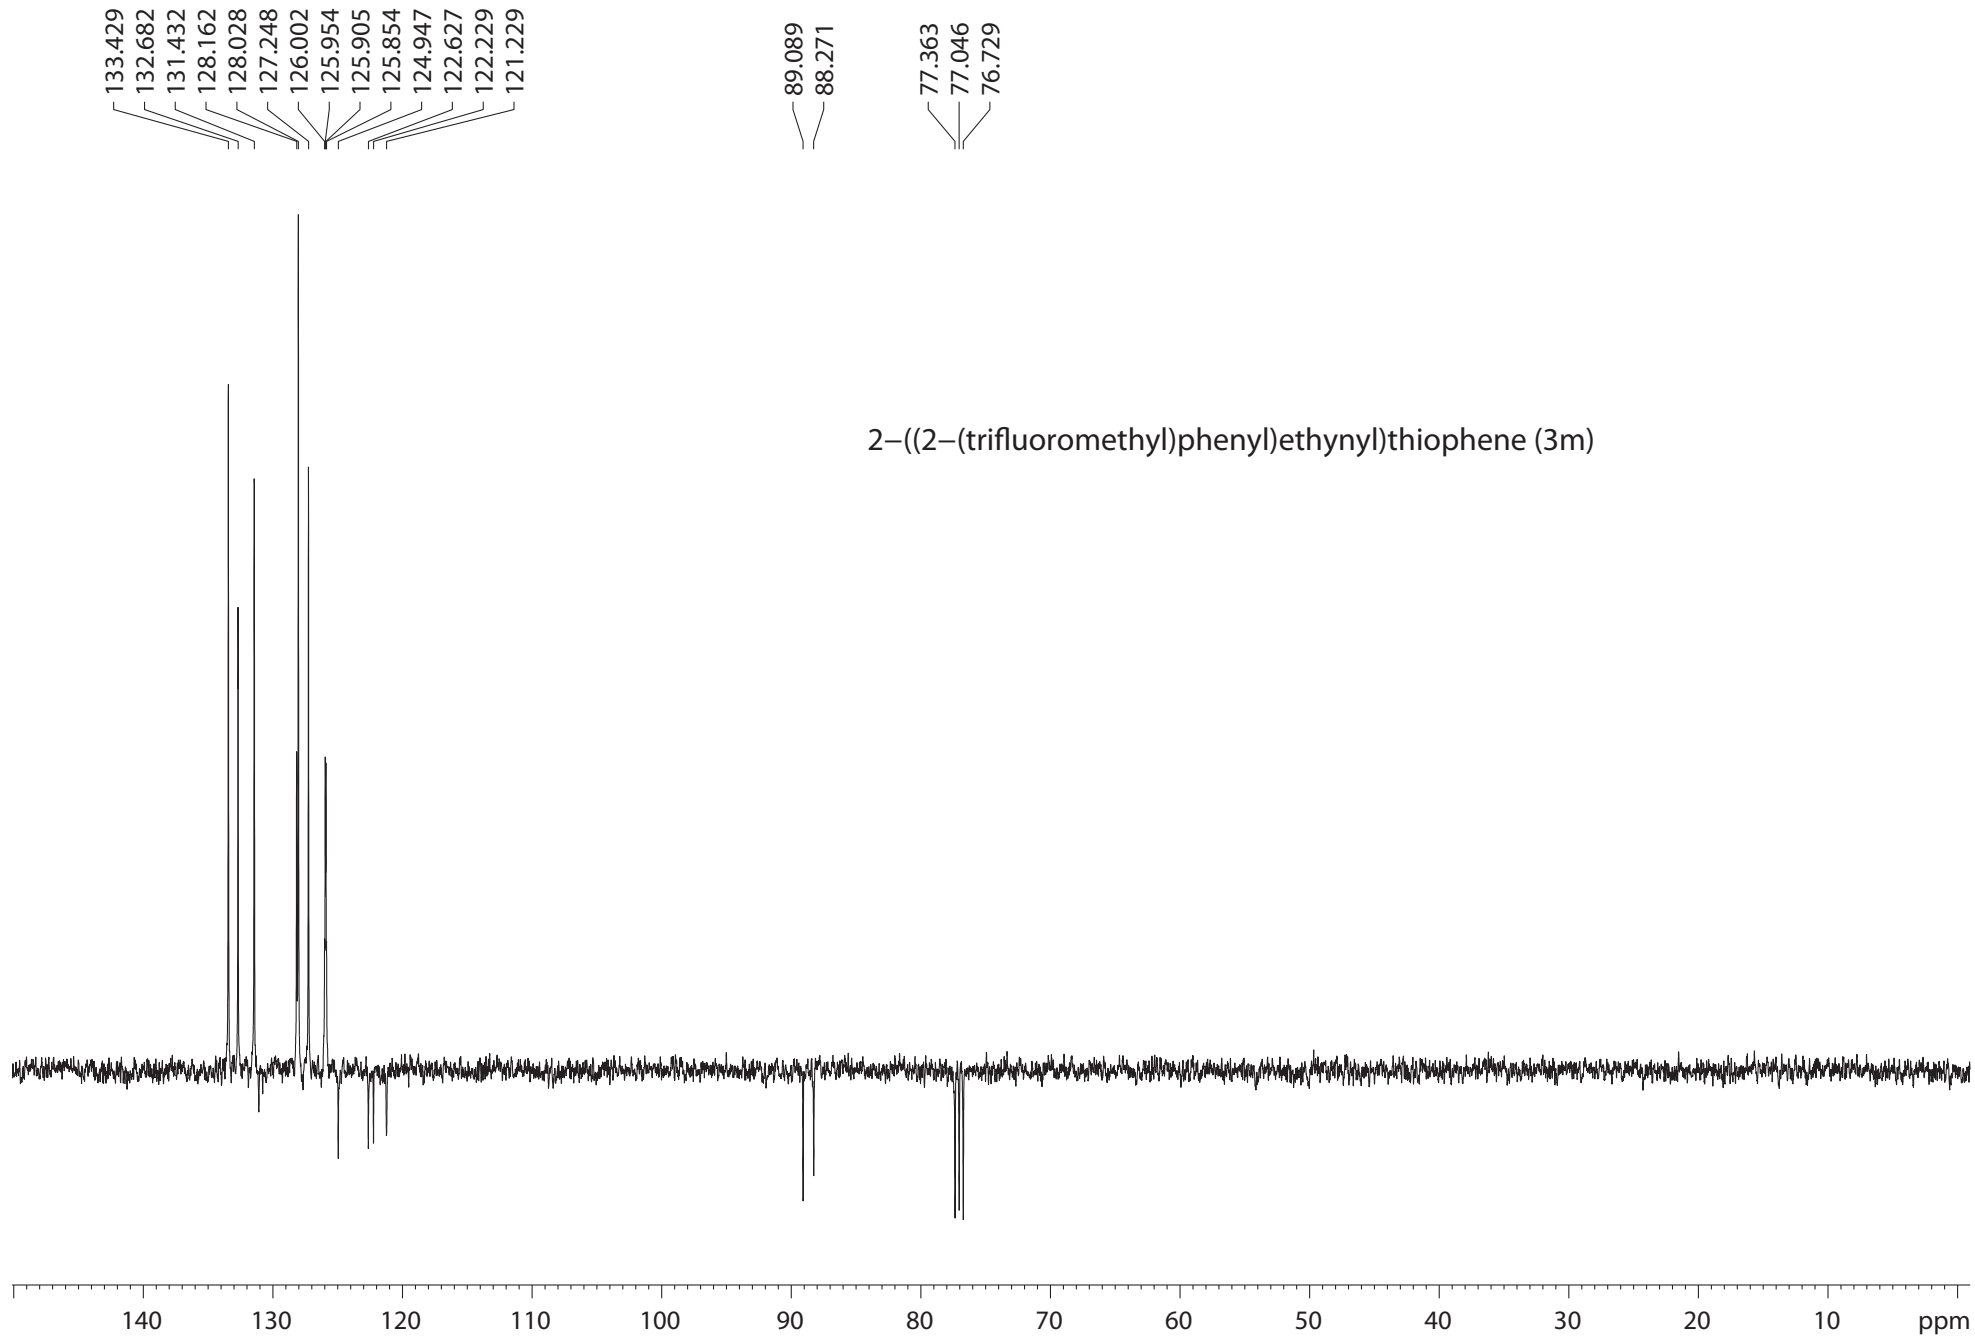

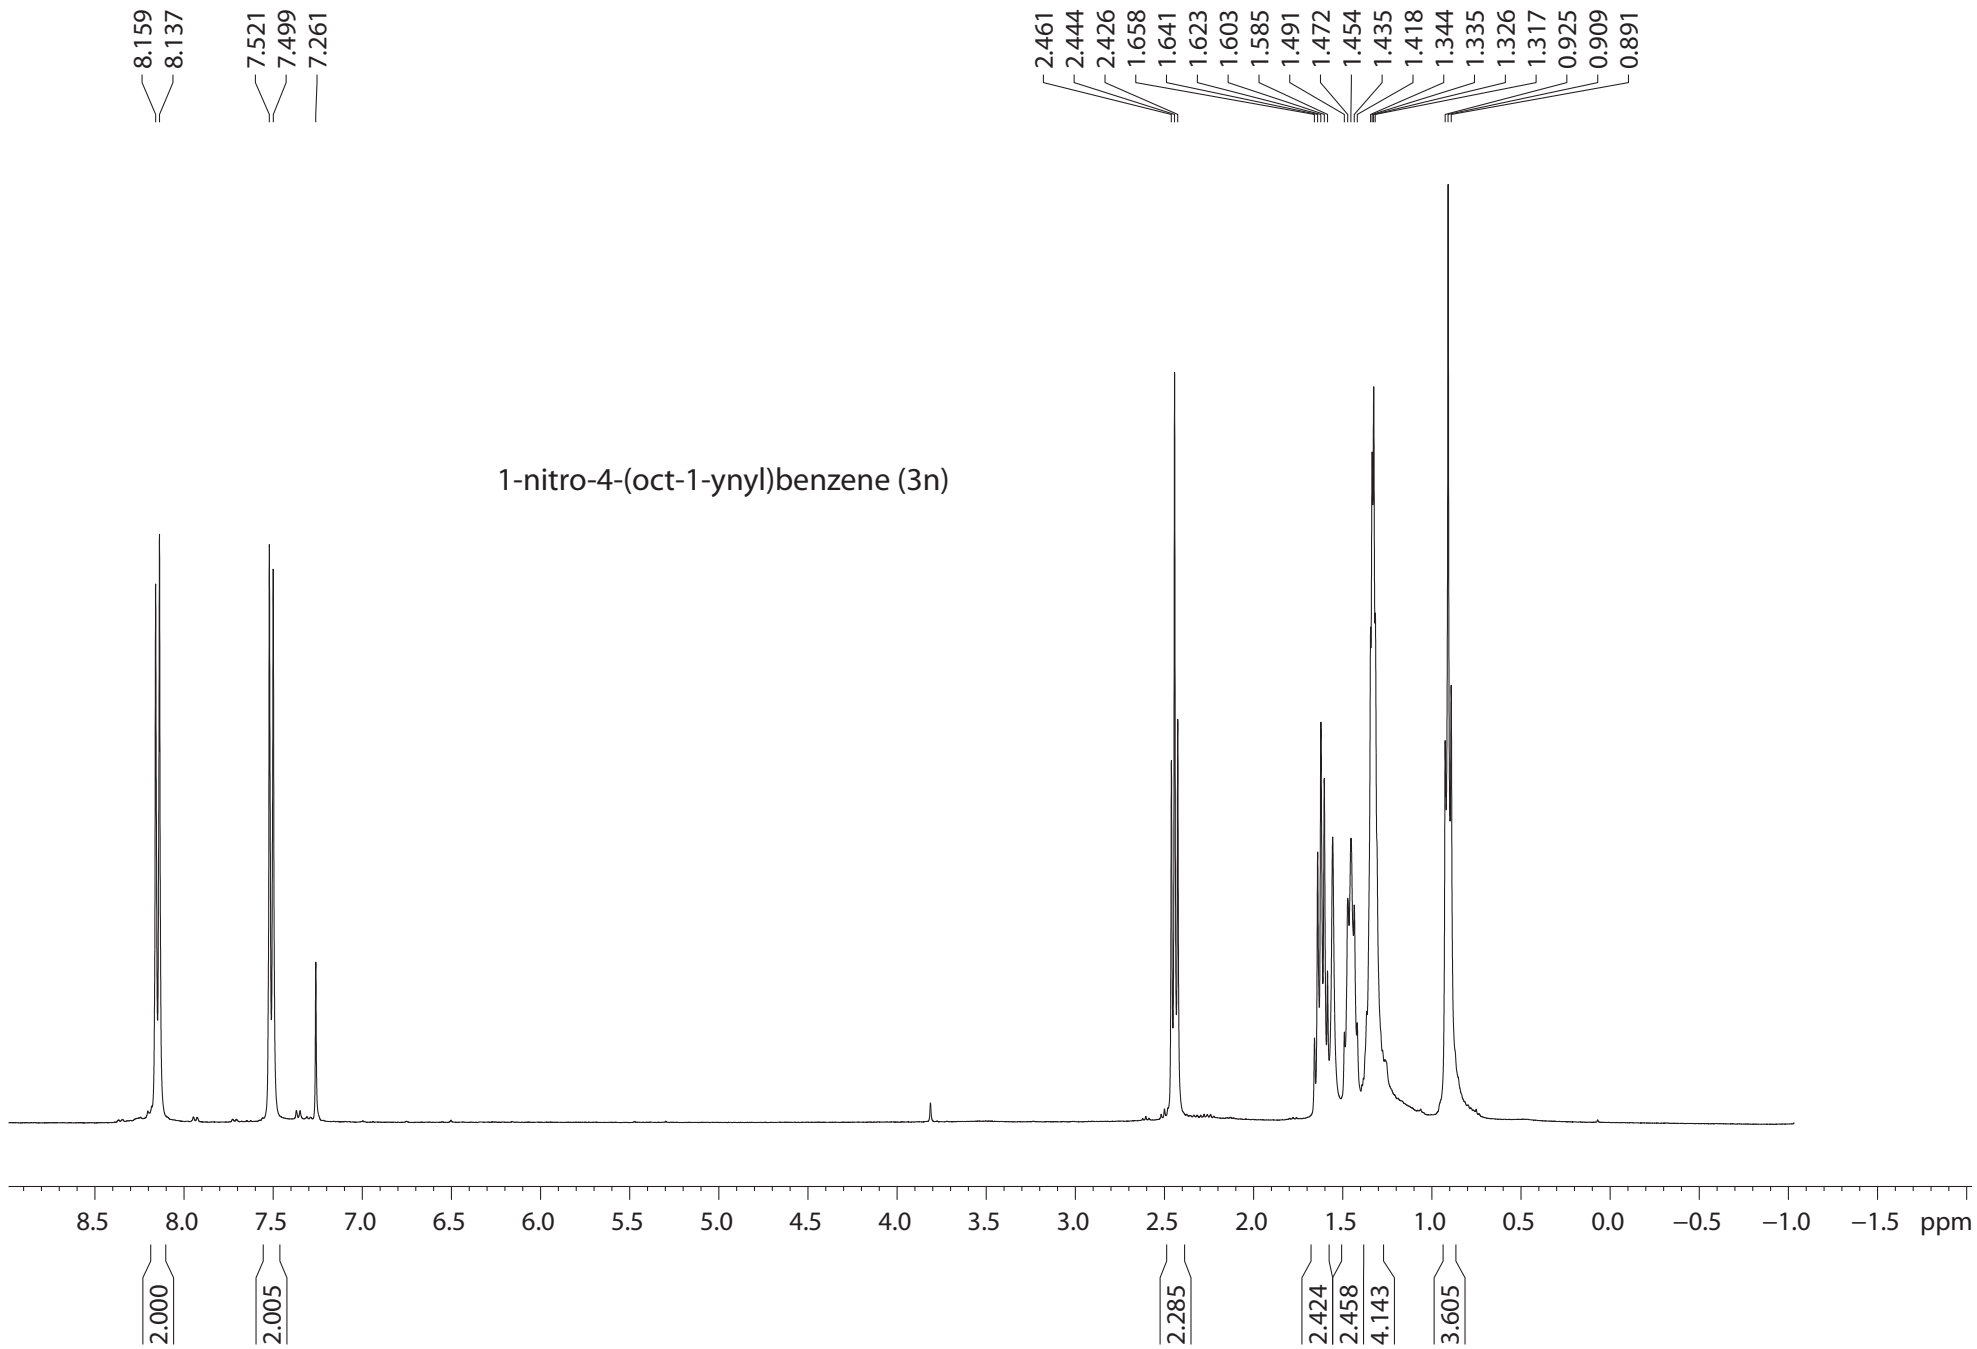

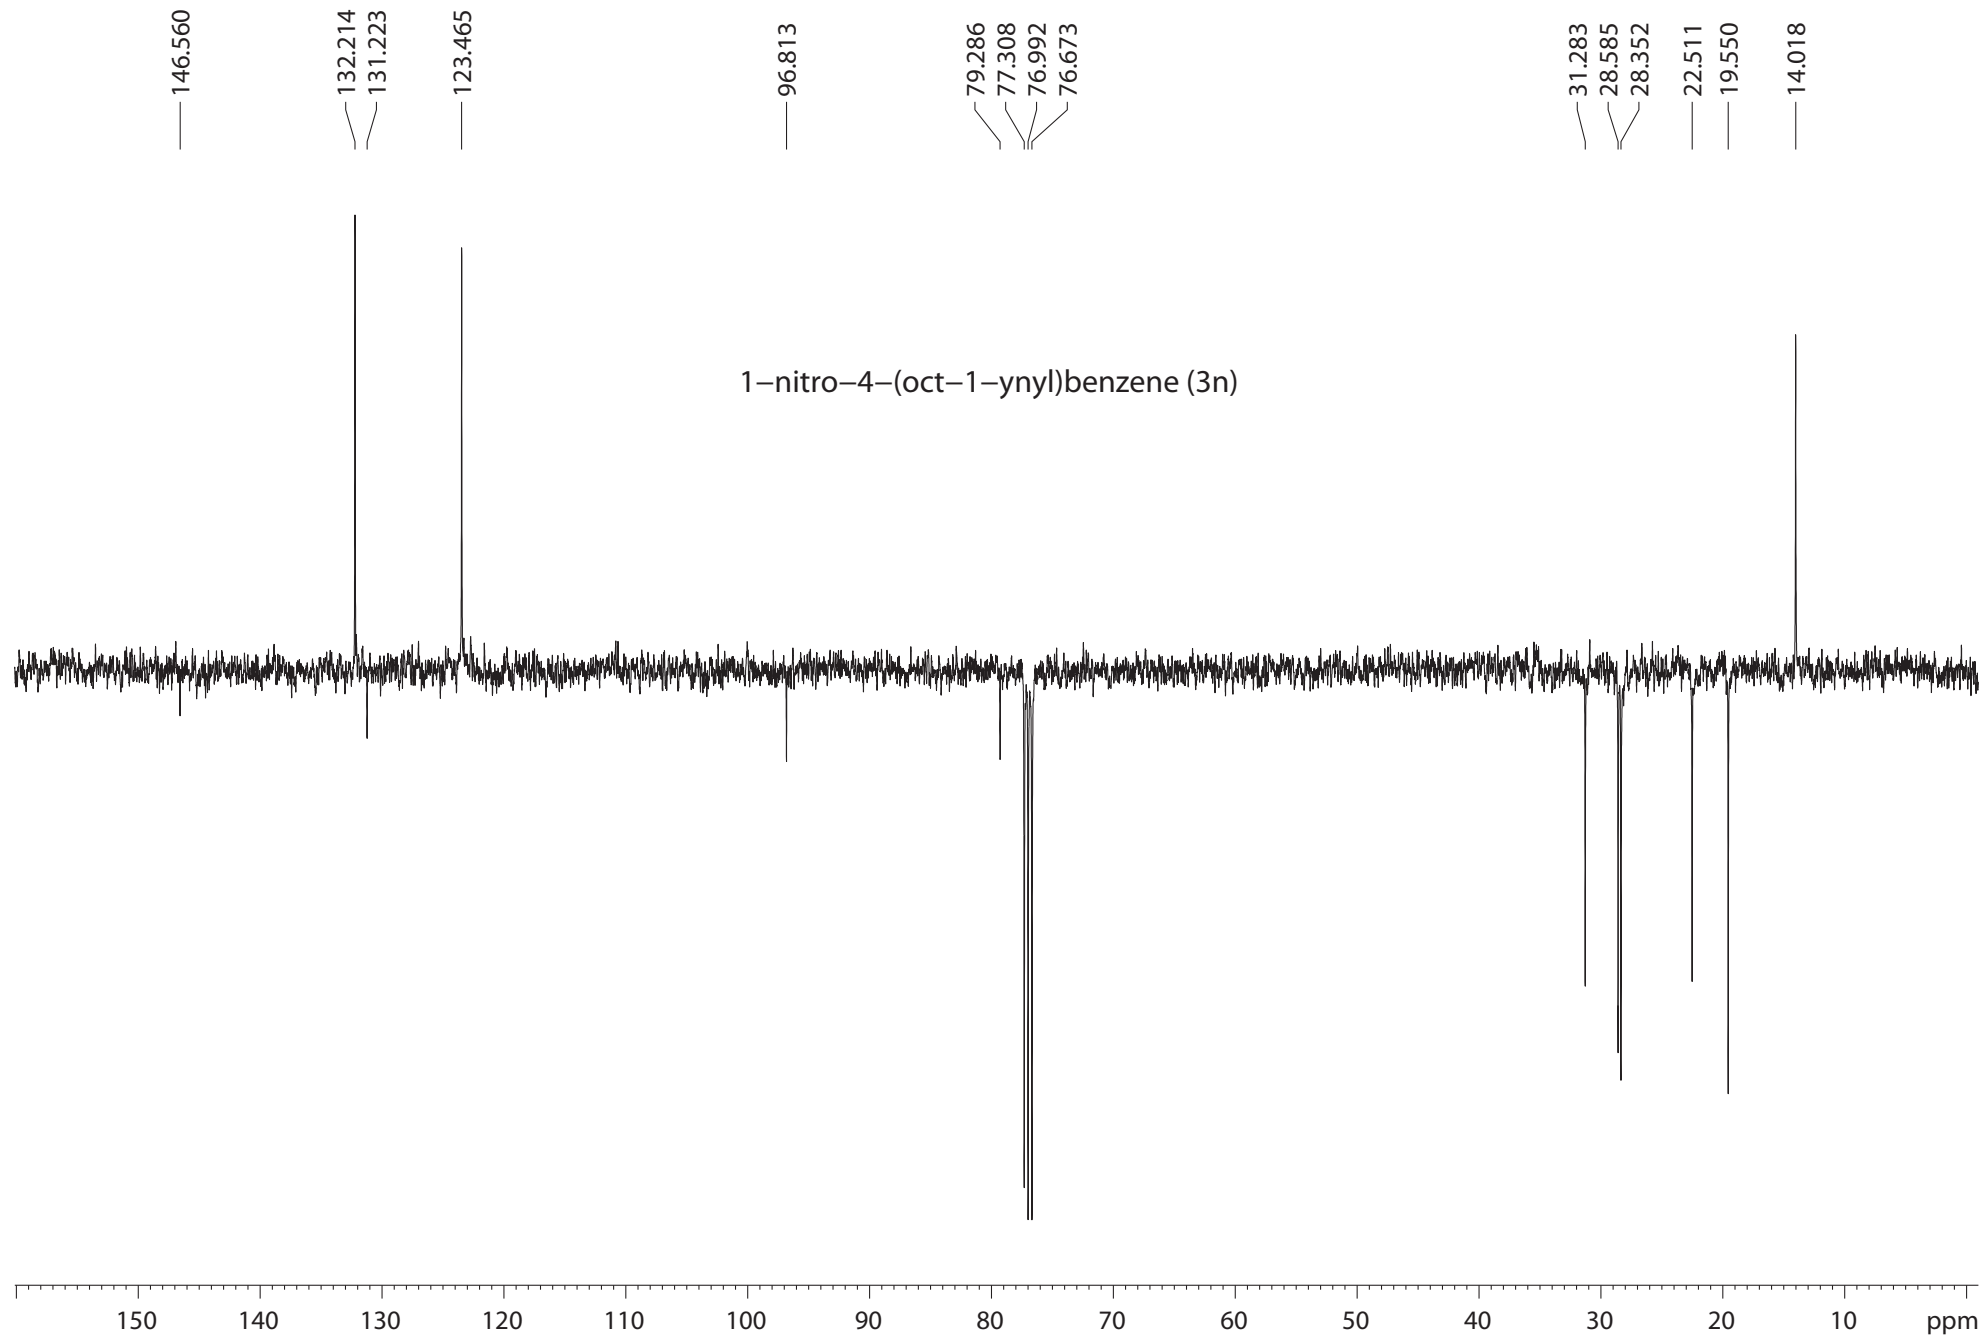



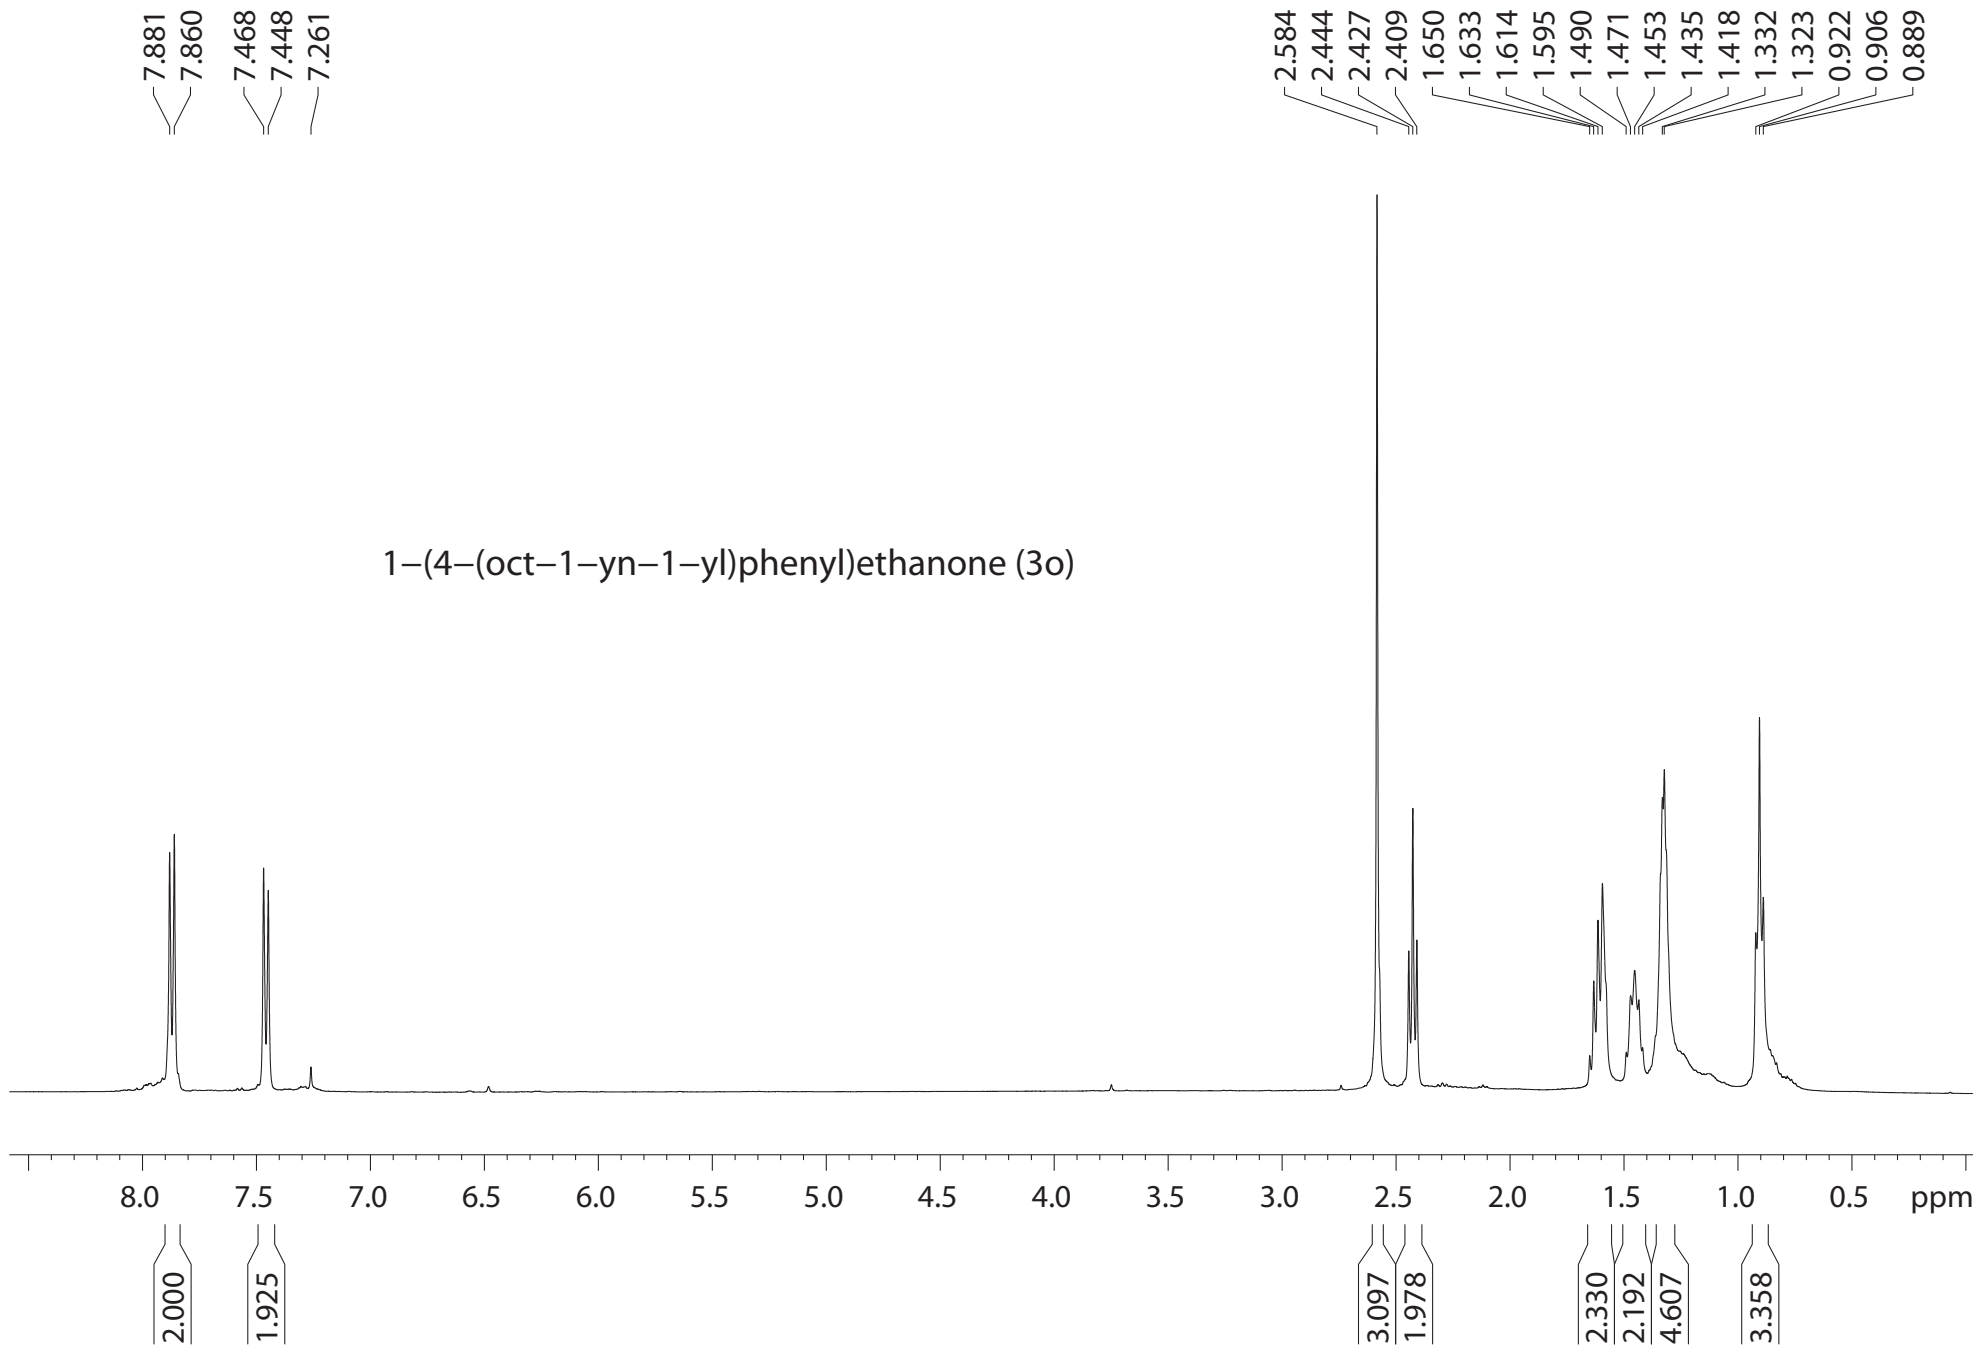

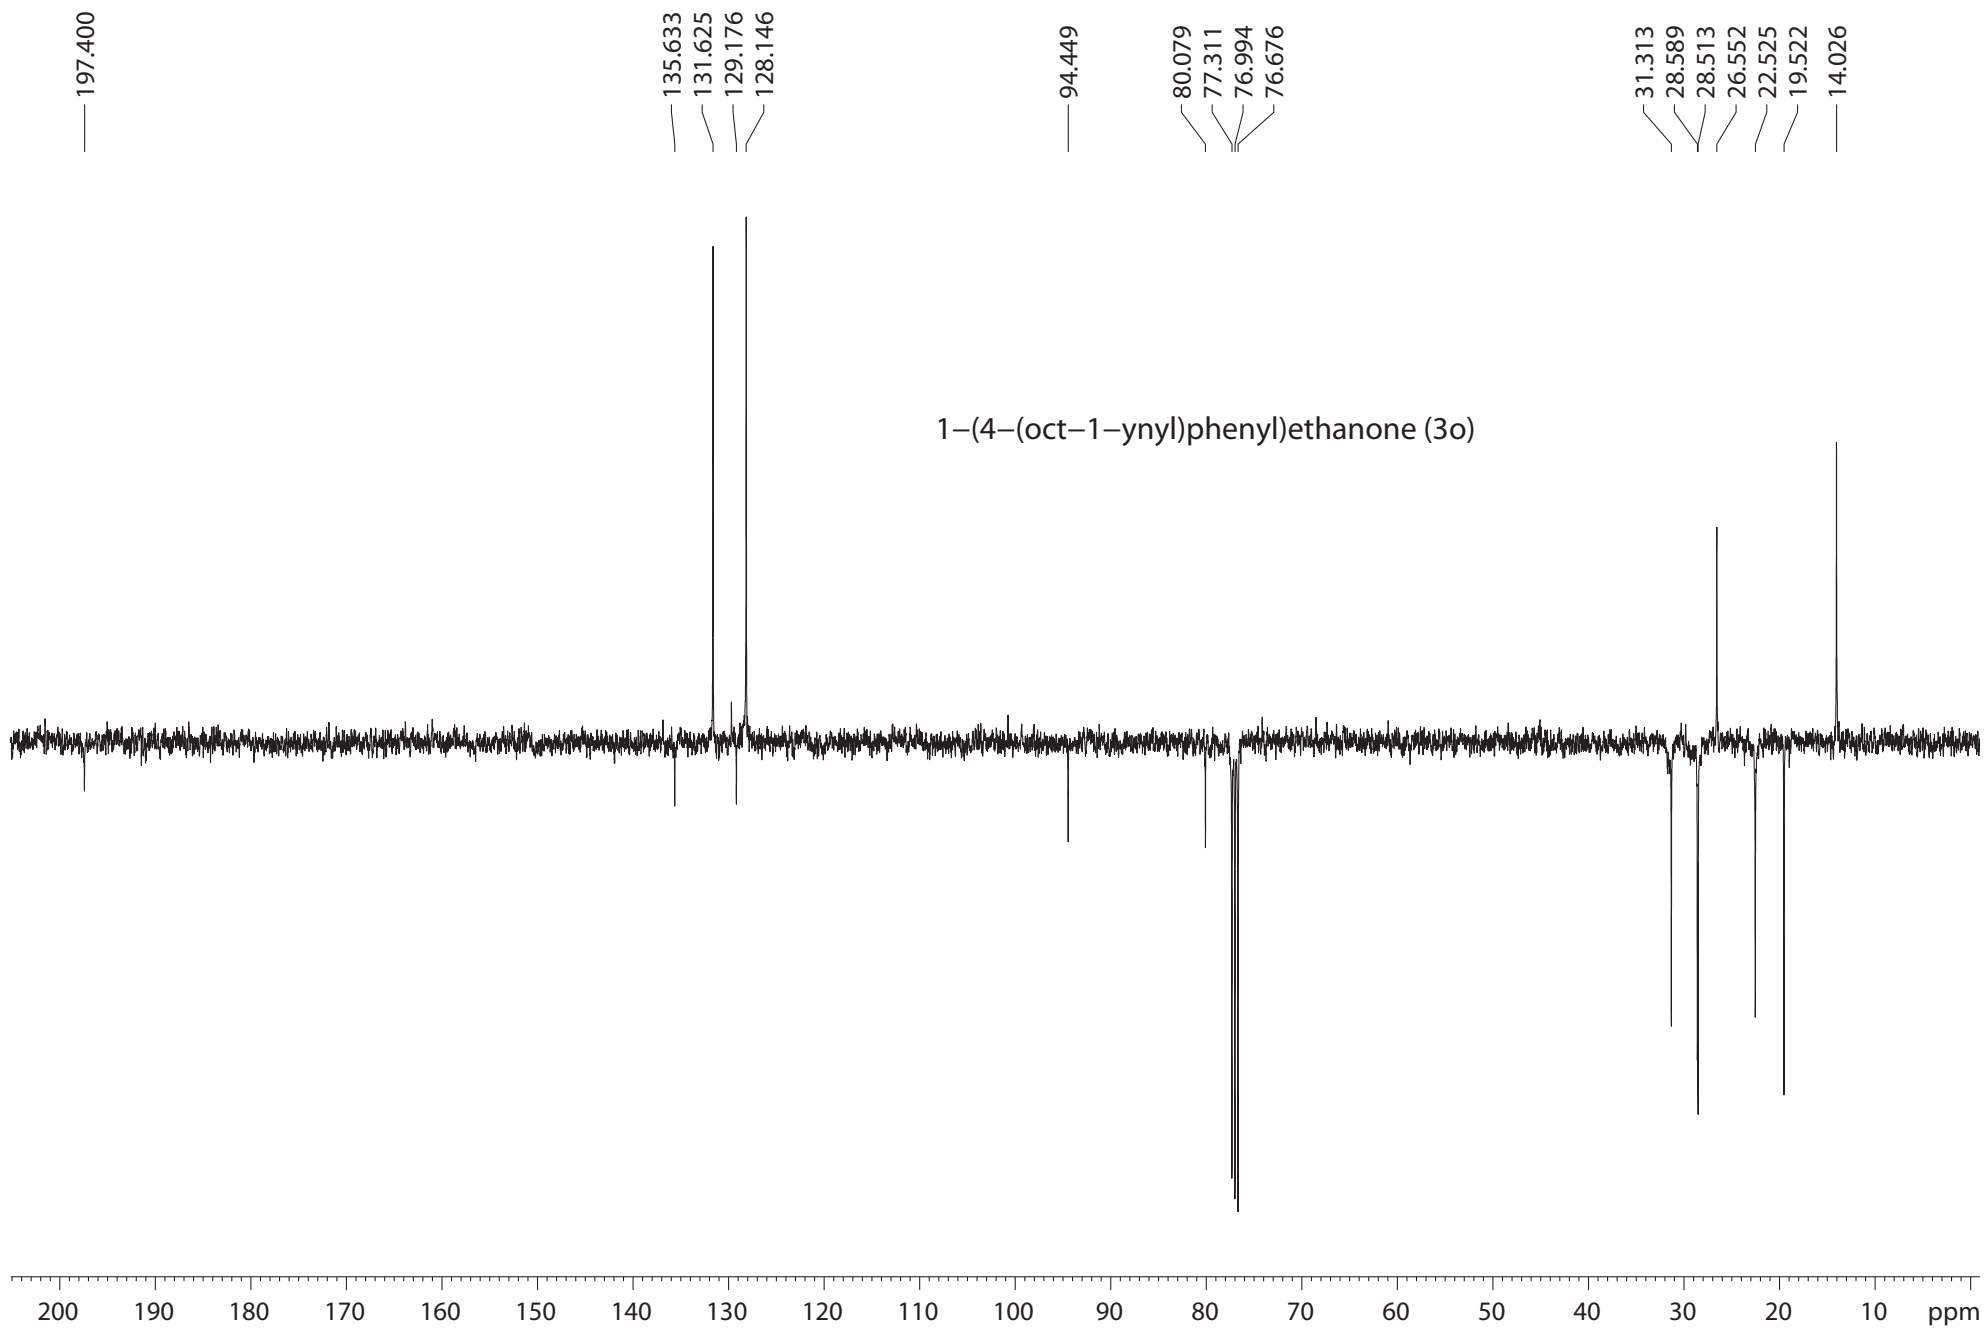

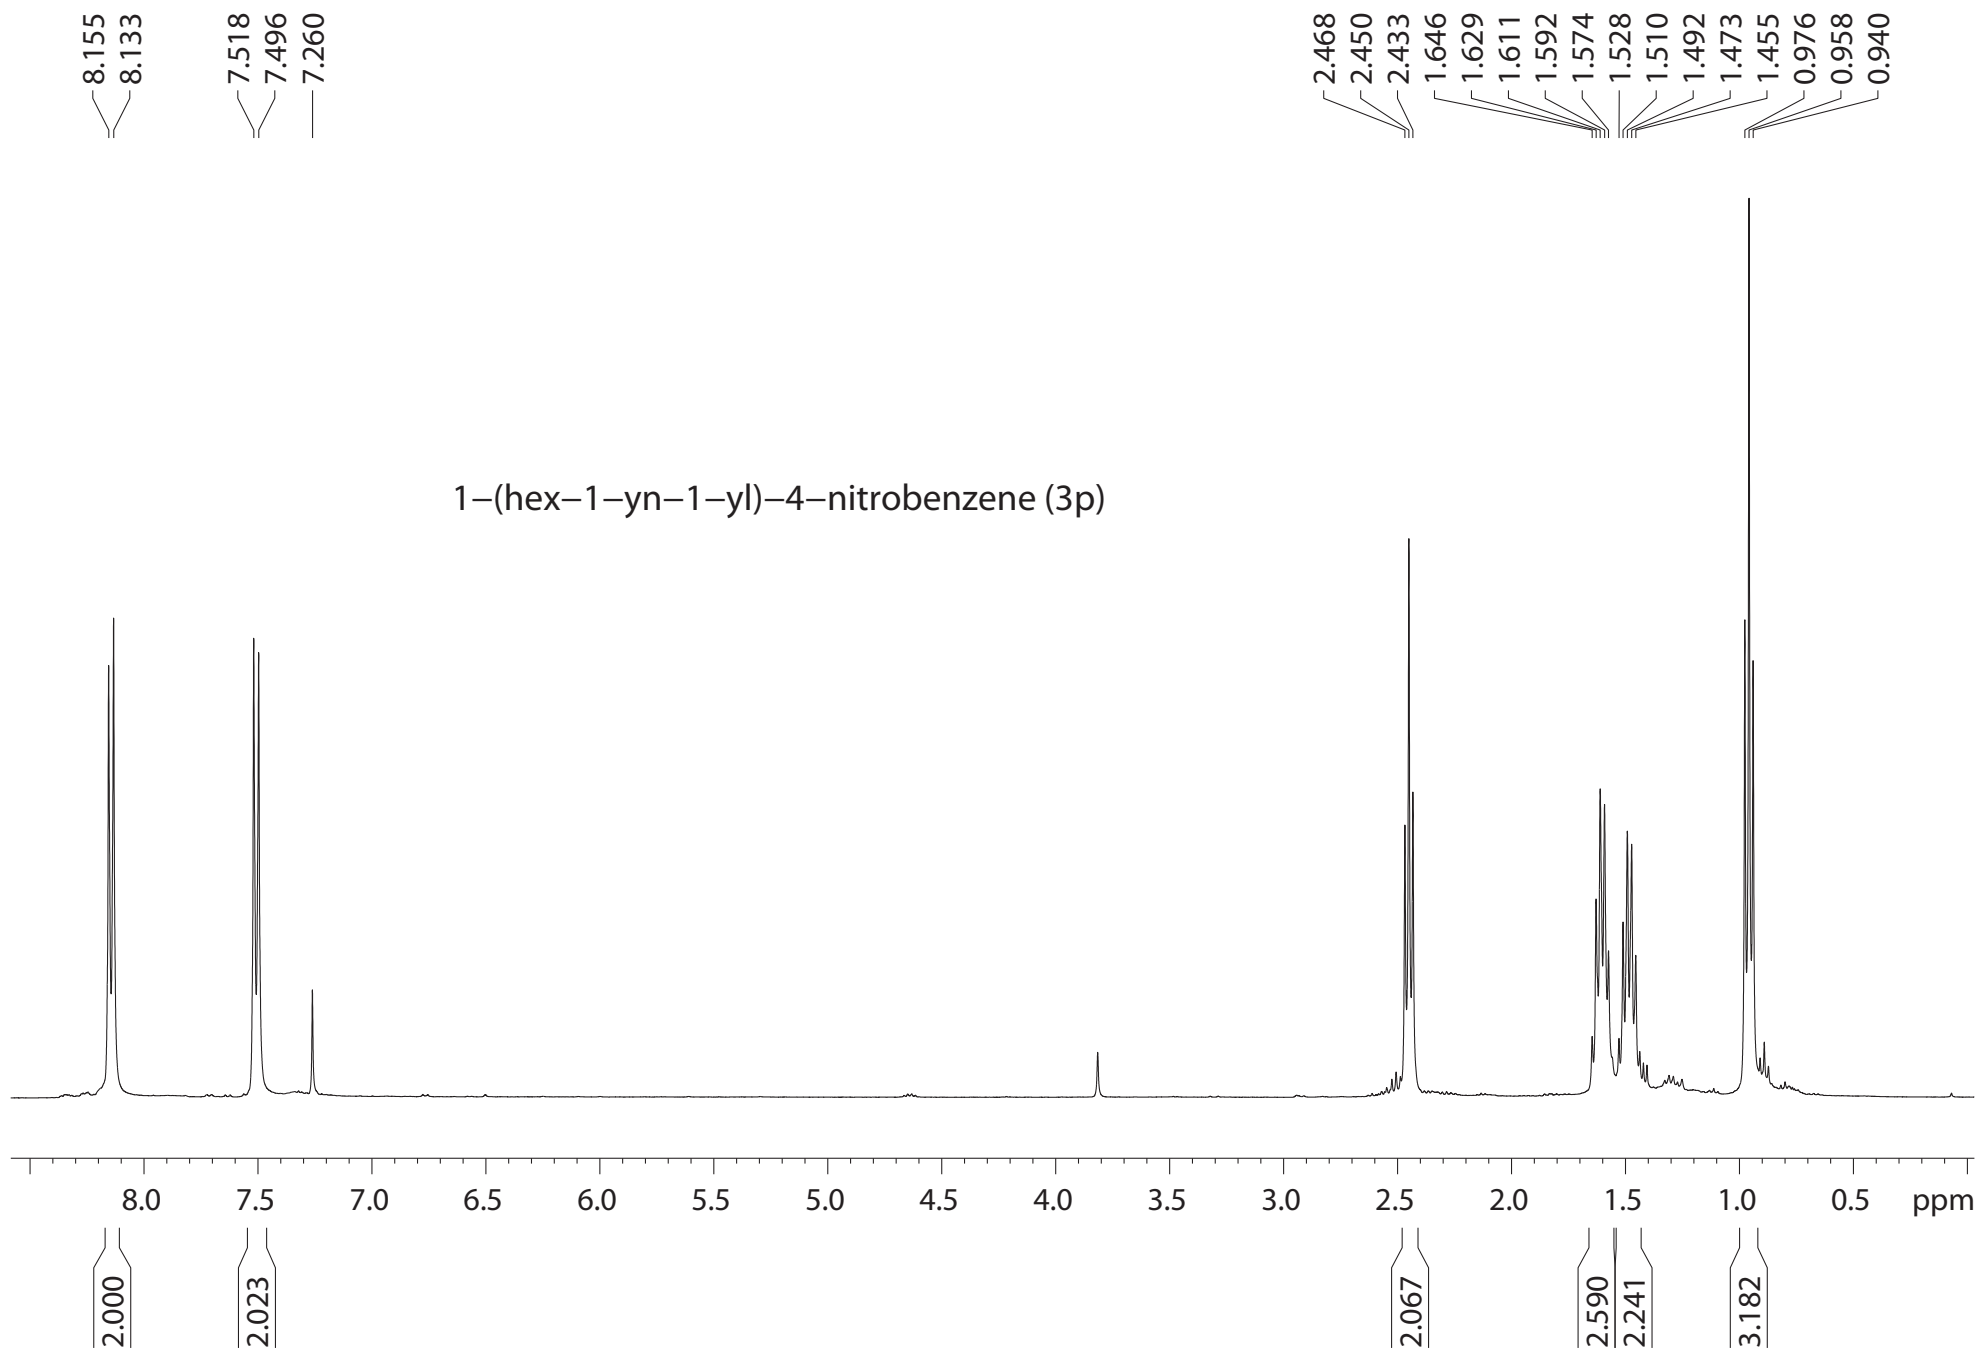

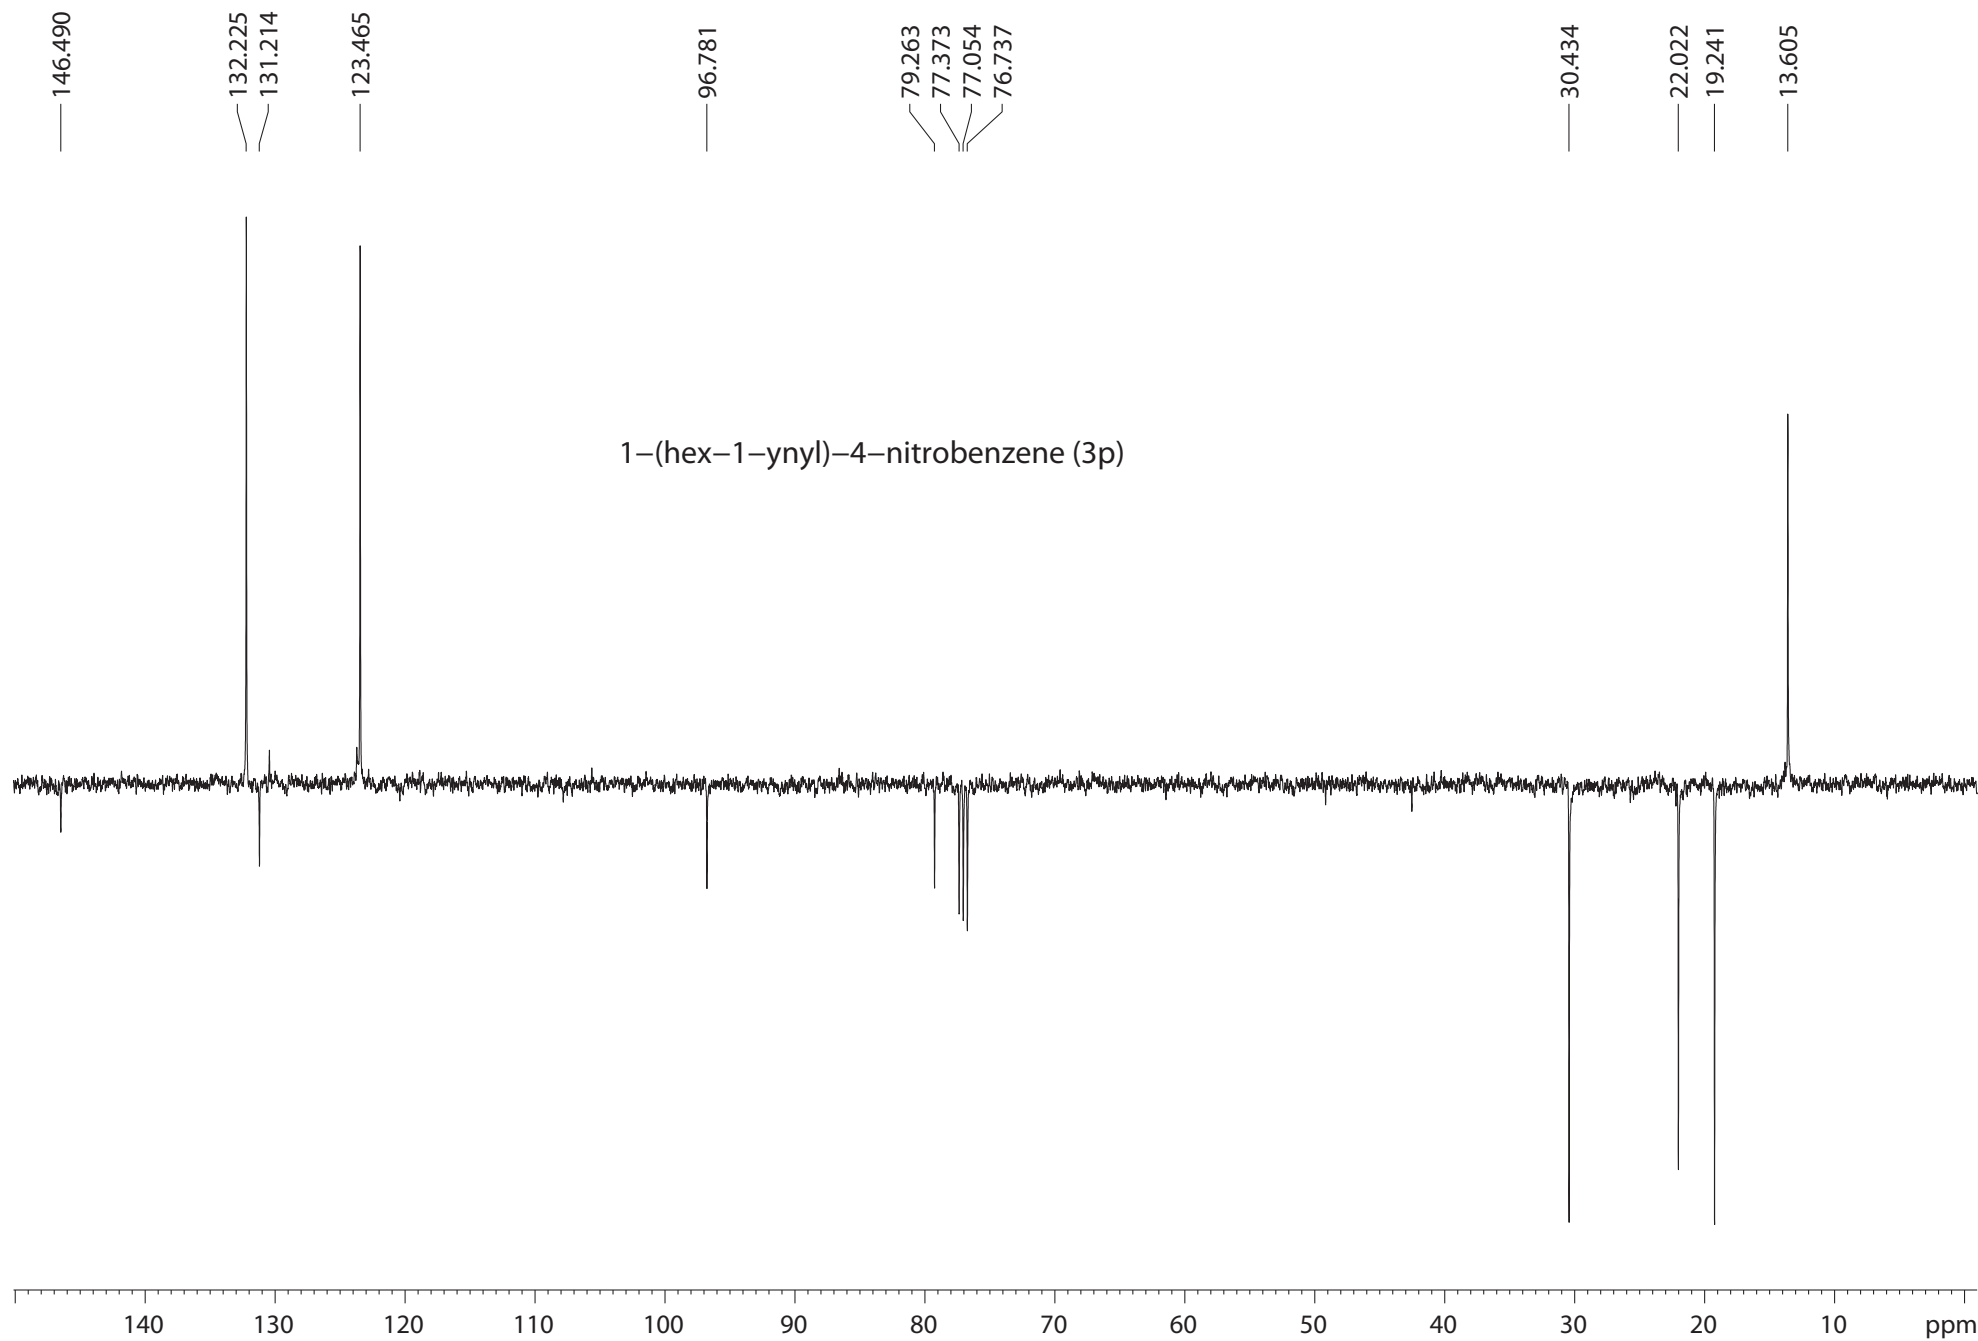

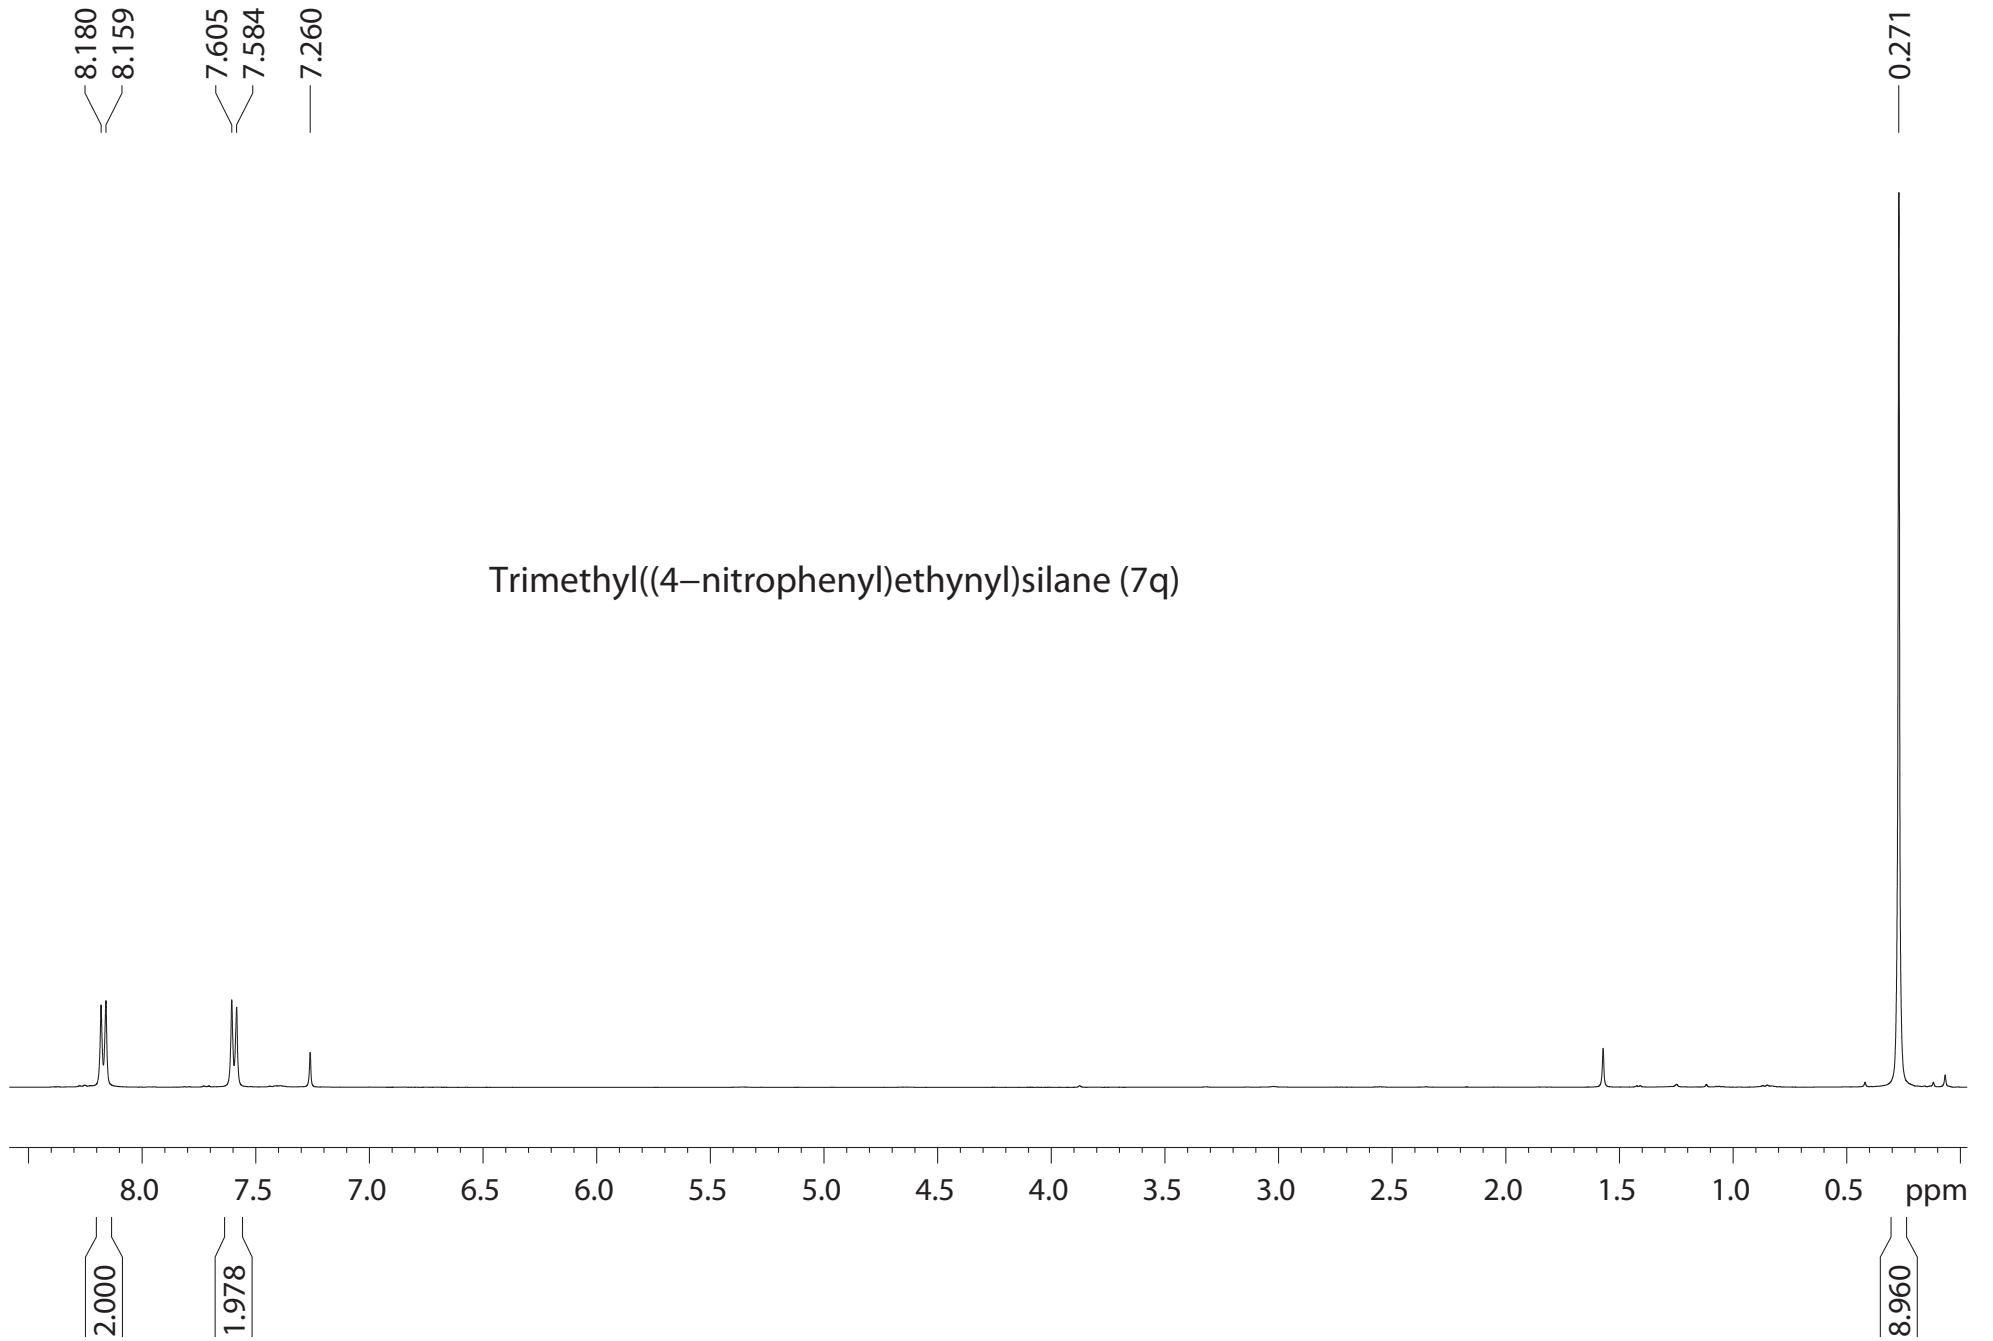

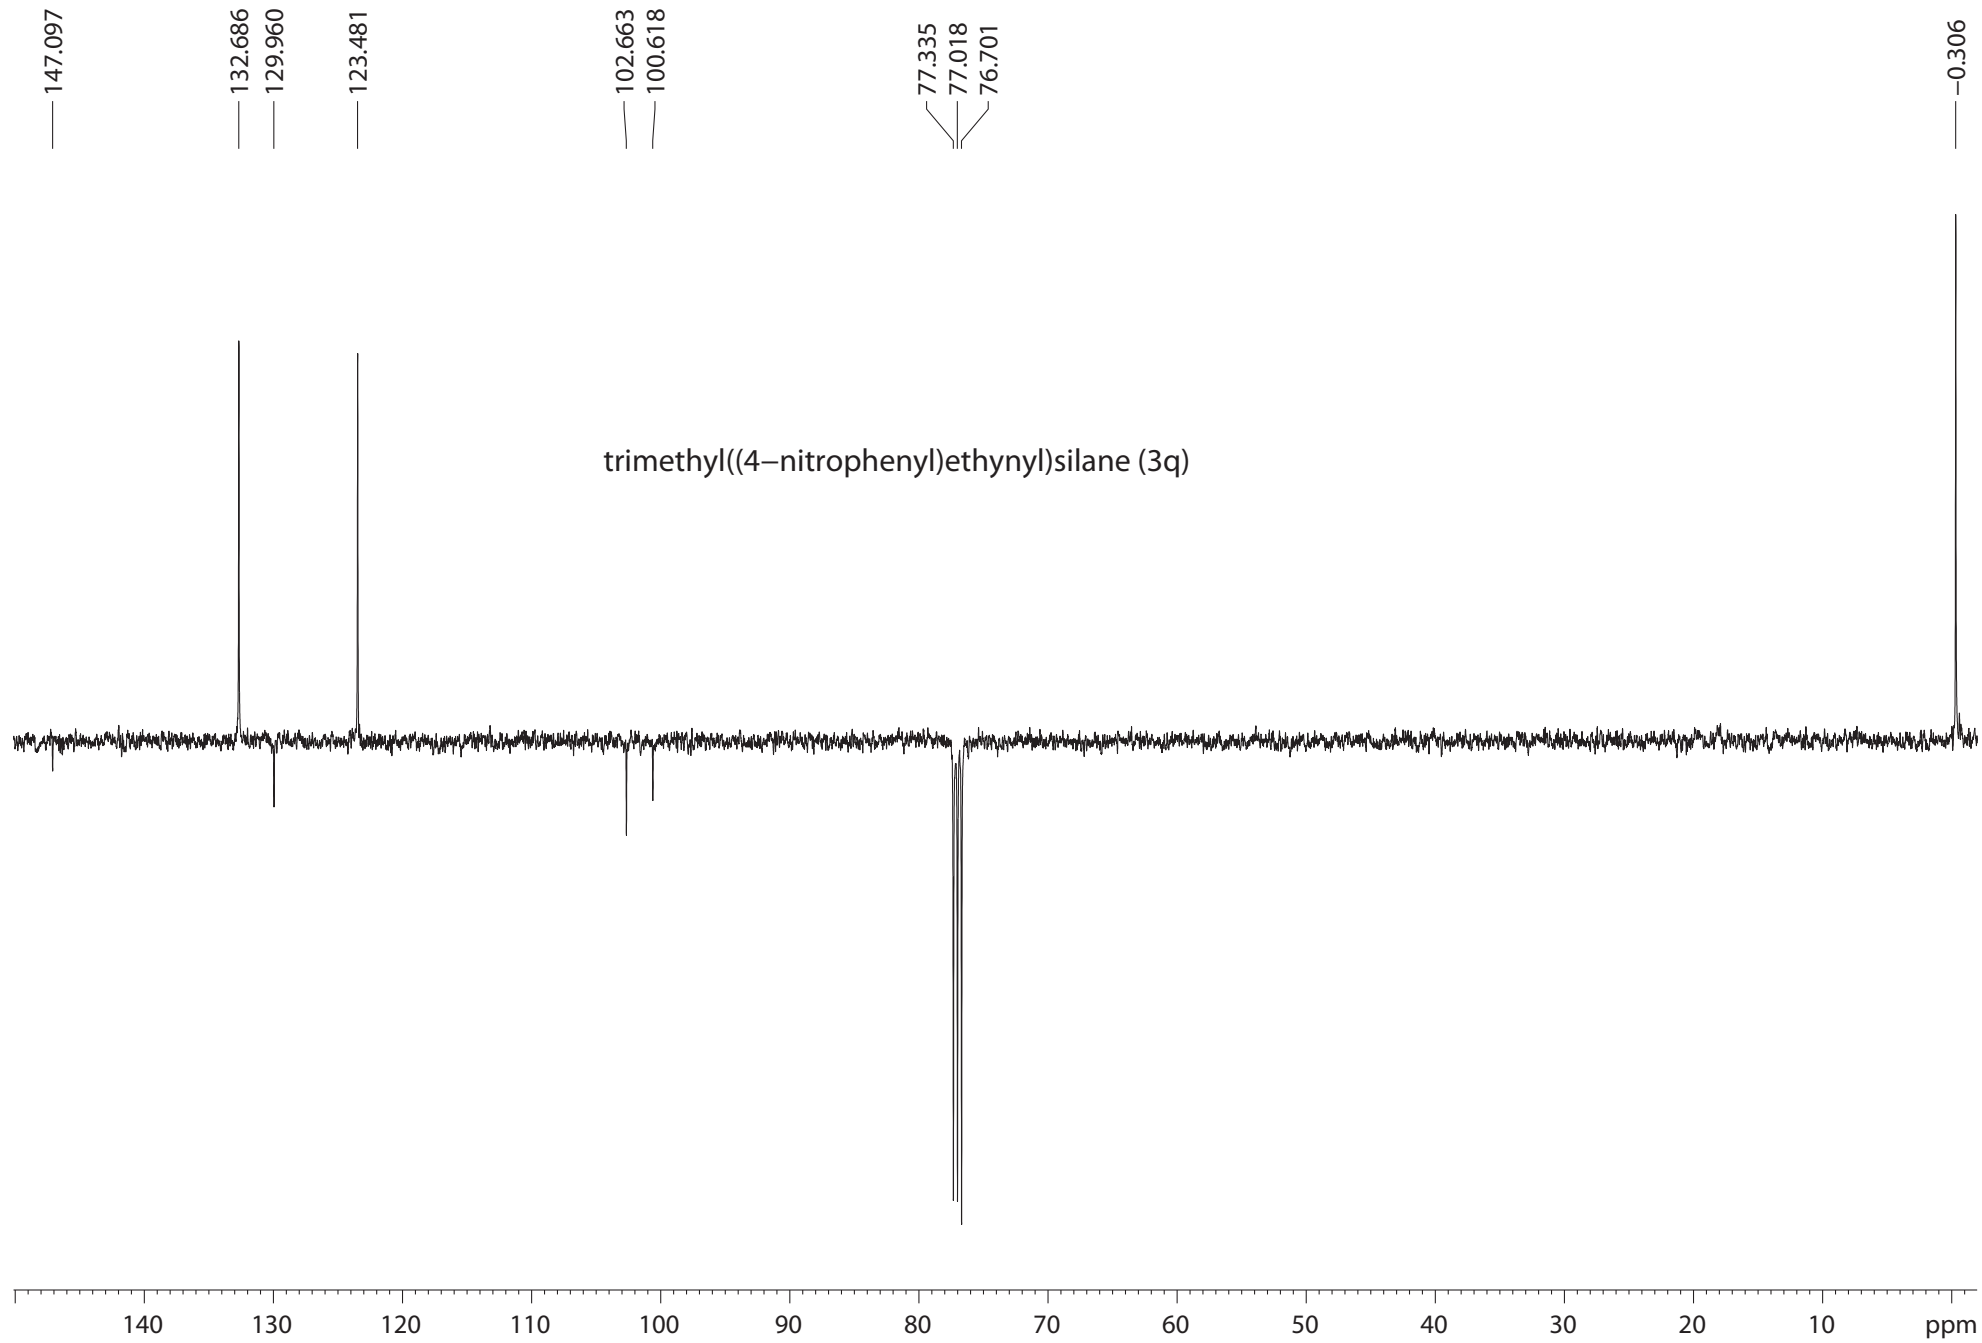

Supplement: c4gc01728e1.pdf [file c4gc01728e1.pdf]
